# Supplementary material
Source: PubMed Central journal article supplement (PMC7659045)
Supplement: jo0c01887_si_002.pdf [file jo0c01887_si_002.pdf]

# Examination of the Dynamic Covalent Chemistry of [2+3]-Imine Cages

Tobias H.G. Schick, Frank Rominger and Michael Mastalerz\*

Organisch-Chemisches Institut Ruprecht-Karls-Universität Heidelberg, Im Neuenheimer Feld 270, 69120 Heidelberg (Germany).

E-mail: michael.mastalerz@oci.uni-heidelberg.de

## Table of Contents

|    |                                                       |     |
|----|-------------------------------------------------------|-----|
| 1  | NMR Spectra.....                                      | S2  |
| 2  | DOSY Experiments.....                                 | S16 |
| 3  | Mass Spectra.....                                     | S18 |
| 4  | Infrared Spectra.....                                 | S20 |
| 5  | Single-crystal X-ray diffraction data.....            | S24 |
| 6  | Cage Formation Experiments .....                      | S30 |
| 7  | Cage-to-cage Scrambling.....                          | S36 |
| 8  | Aldehyde Exchange.....                                | S42 |
| 9  | Amine Exchange .....                                  | S56 |
| 10 | Estimating Thermodynamic Data for Amine Exchange..... | S65 |

## 1. NMR Spectra

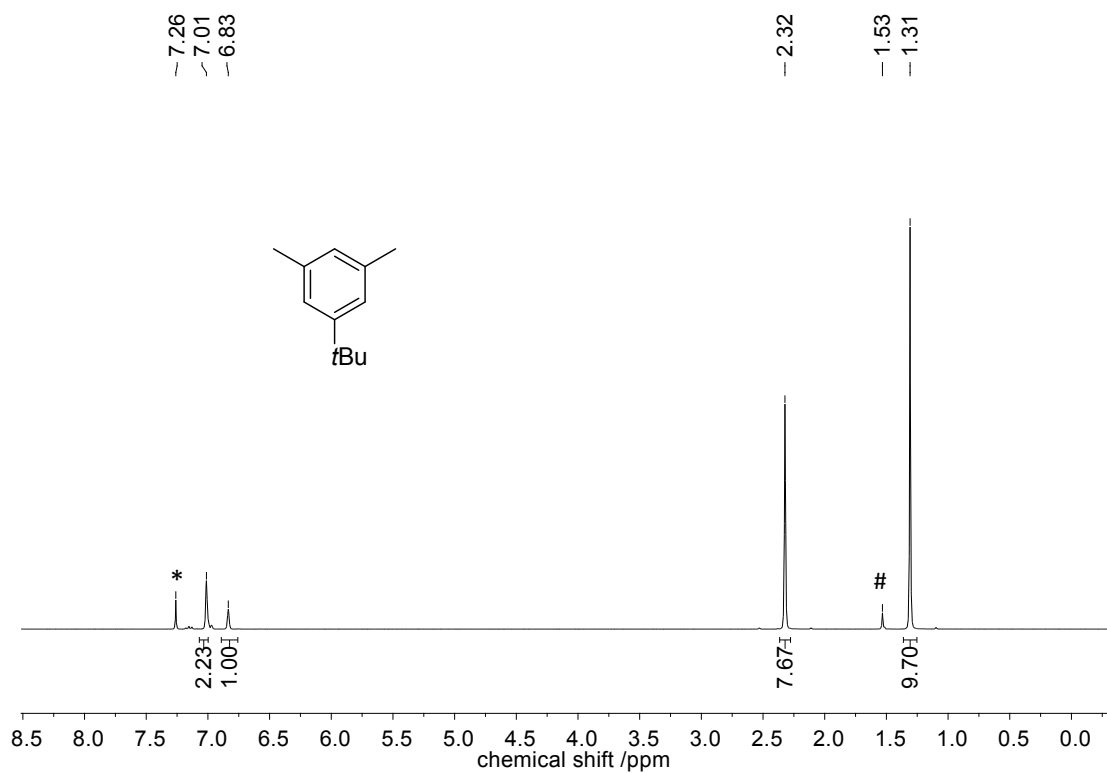

**Figure S1.**  $^1\text{H}$  NMR spectrum ( $\text{CDCl}_3$ , 300 MHz) of 1-(*tert*-butyl)-3,5-dimethylbenzene. \* $\text{CHCl}_3$ , # $\text{H}_2\text{O}$ .

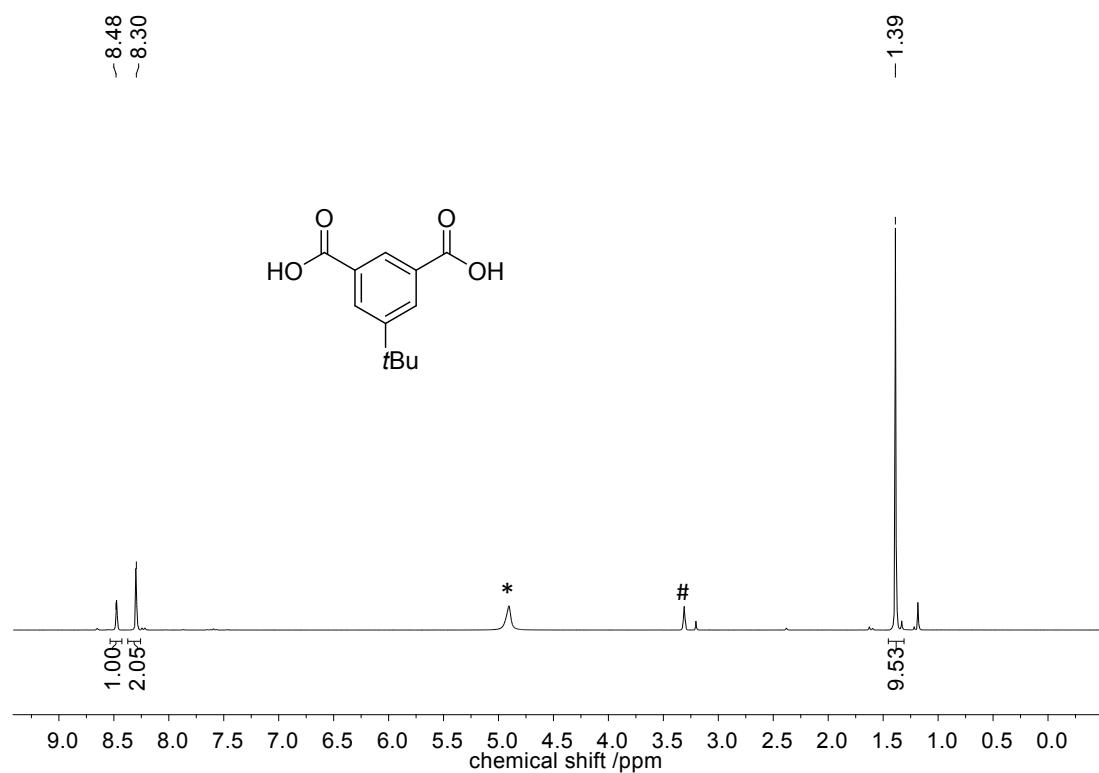

**Figure S2.**  $^1\text{H}$  NMR spectrum of 5-(*tert*-butyl)isophthalic acid- $\text{d}_9$  ( $\text{MeOD}$ , 300 MHz). \* $\text{H}_2\text{O}$ , # $\text{MeOH}$ .

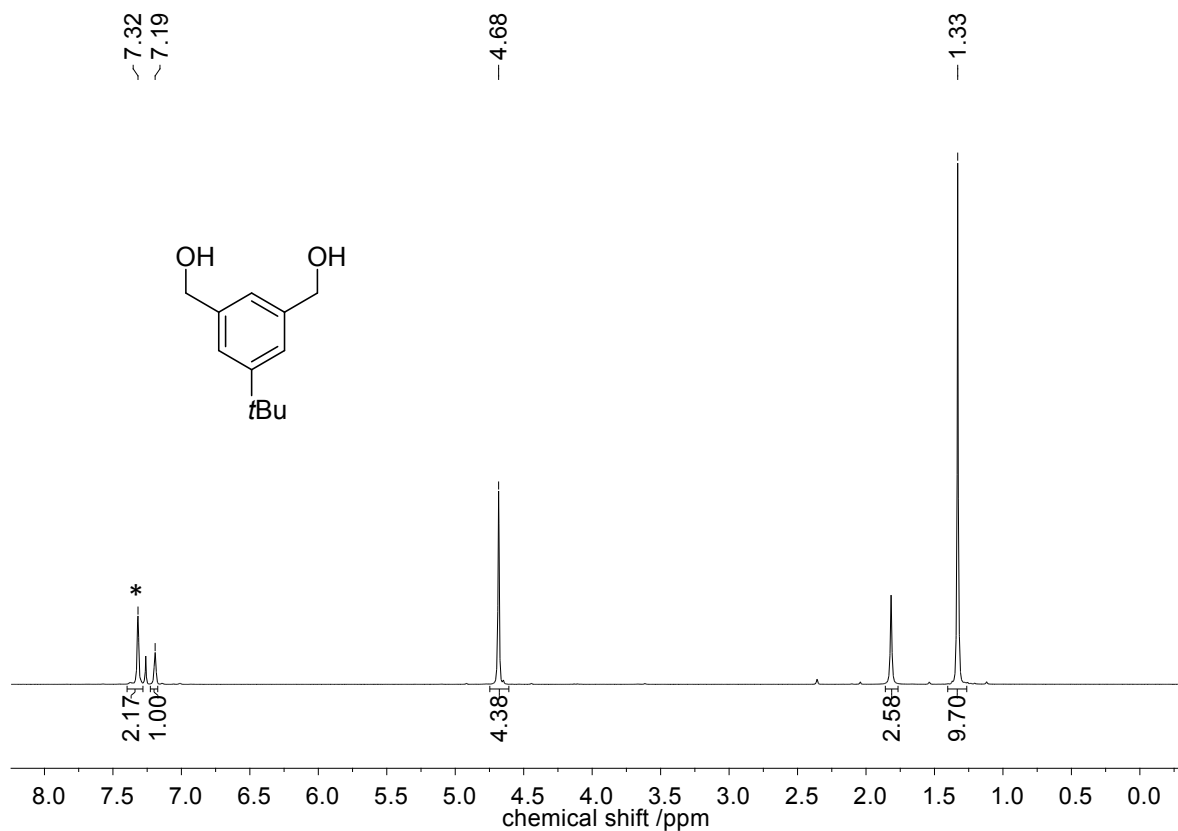

**Figure S3.**  $^1\text{H}$  NMR spectrum ( $\text{CDCl}_3$ , 400 MHz) of (5-(*tert*-butyl)-1,3-dihydroxymethylenebenzene- $\text{d}_9$ ).  $^*\text{CHCl}_3$ .

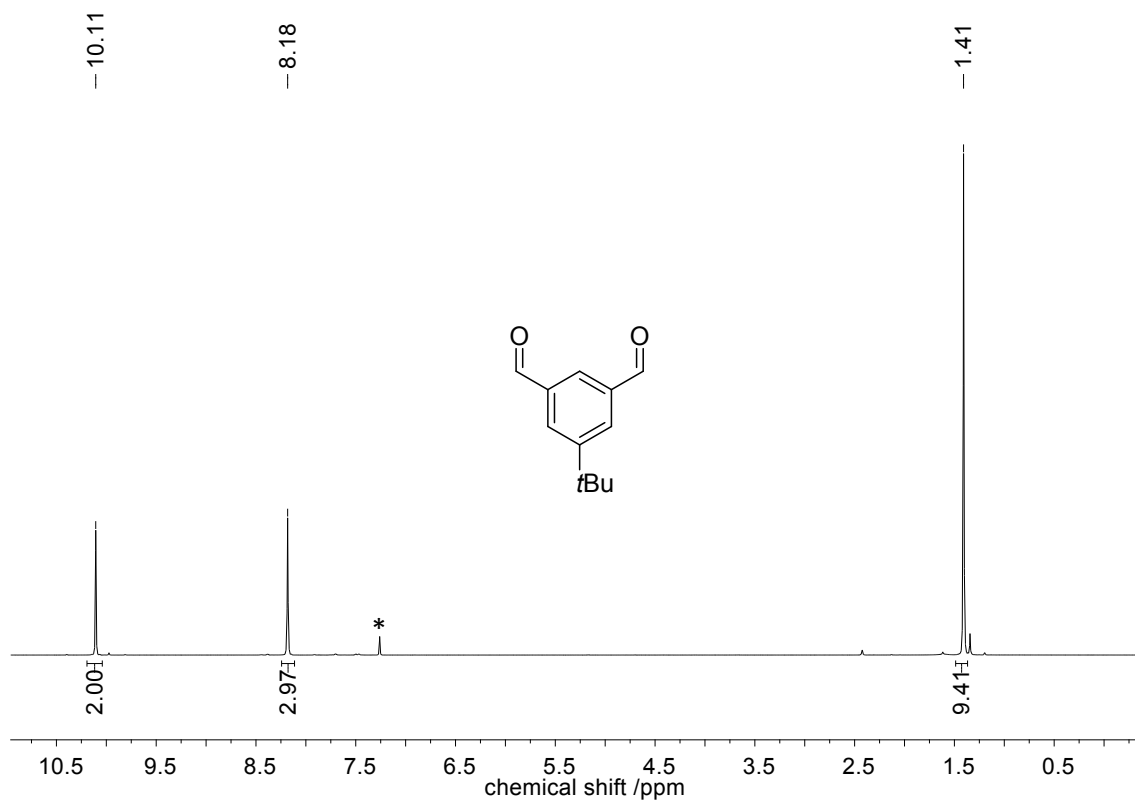

**Figure S4.**  $^1\text{H}$  NMR spectrum ( $\text{CDCl}_3$ , 400 MHz) of compound **1-d9**.  $^*\text{CHCl}_3$ .

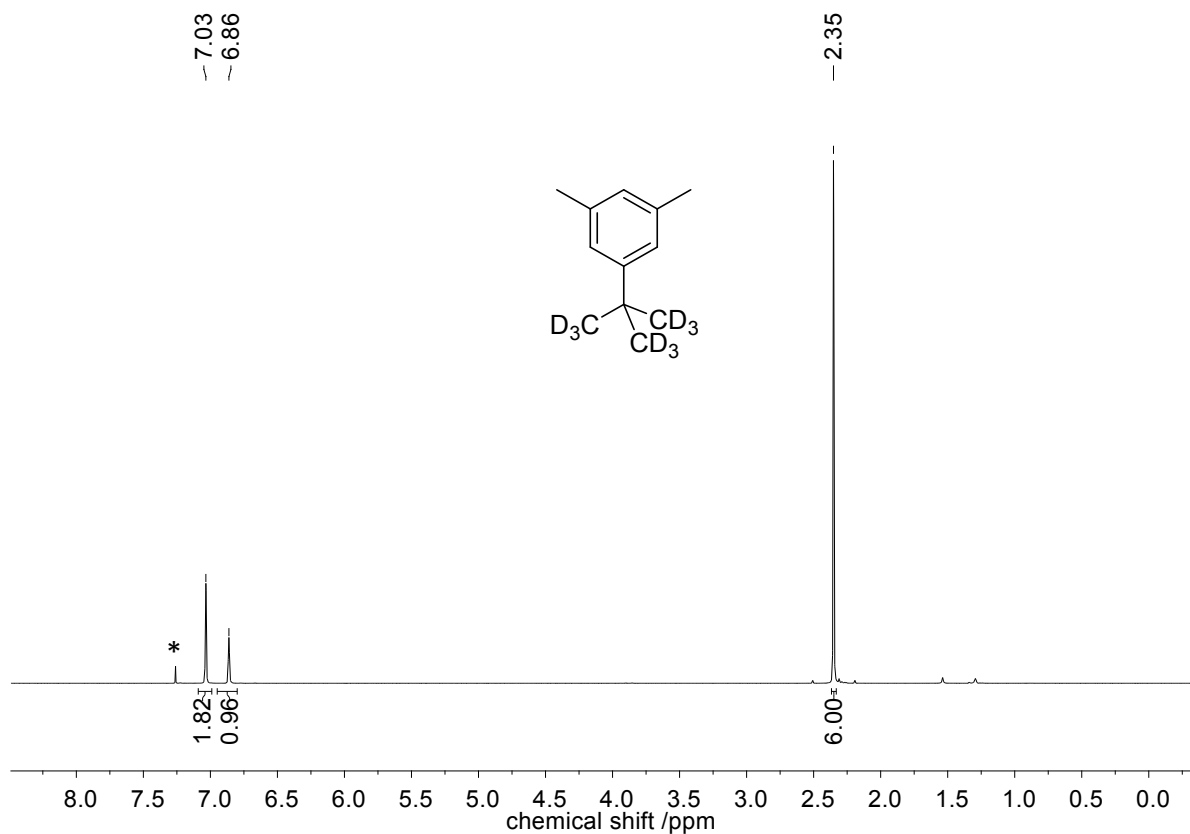

**Figure S5.**  $^1\text{H}$  NMR spectrum ( $\text{CDCl}_3$ , 400 MHz) of 1-(*tert*-butyl)-3,5-dimethylbenzene-d9. \* $\text{CHCl}_3$ .

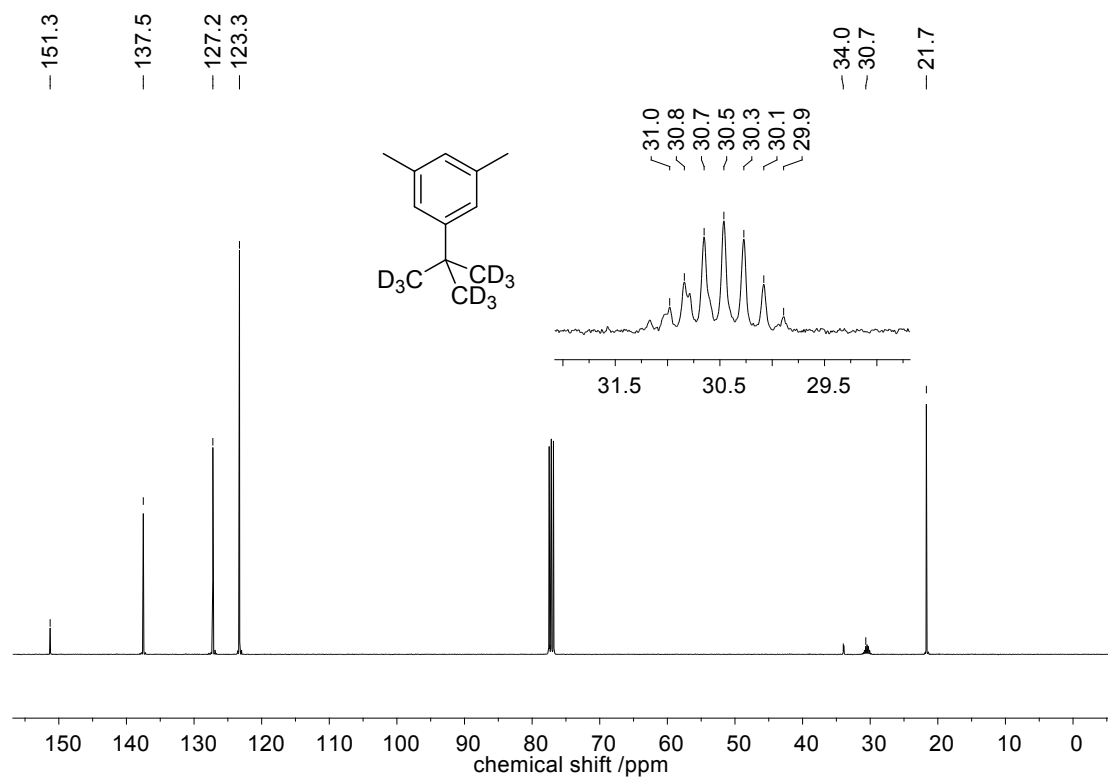

**Figure S6.**  $^{13}\text{C}$  NMR spectrum ( $\text{CDCl}_3$ , 100 MHz) of compound 1-(*tert*-butyl)-3,5-dimethylbenzene-d9.

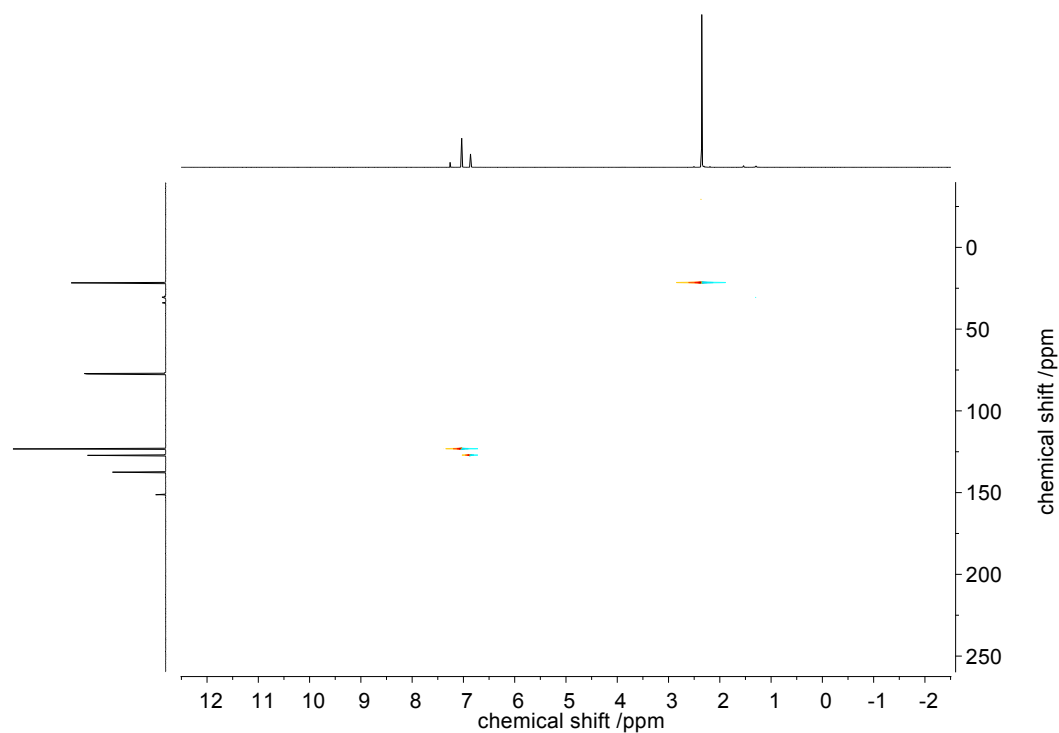

**Figure S7.** HSQC NMR spectrum  $\text{CDCl}_3$ , (400/100 MHz) of 1-(*tert*-butyl)-3,5-dimethylbenzene- $\text{d}_9$ .

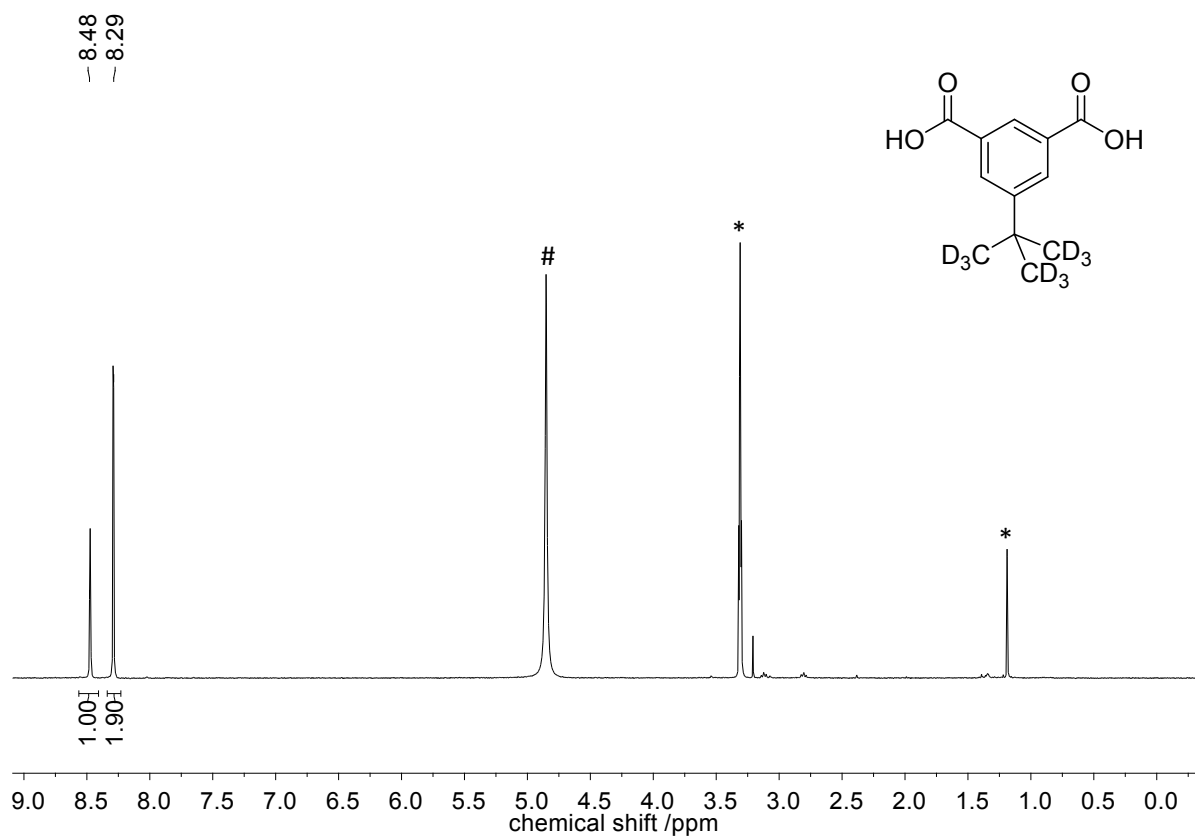

**Figure S8.**  $^1\text{H}$  NMR spectrum of 5-(*tert*-butyl)isophthalic acid- $\text{d}_9$  (MeOD, 300 MHz). \*MeOH, # $\text{H}_2\text{O}$ .

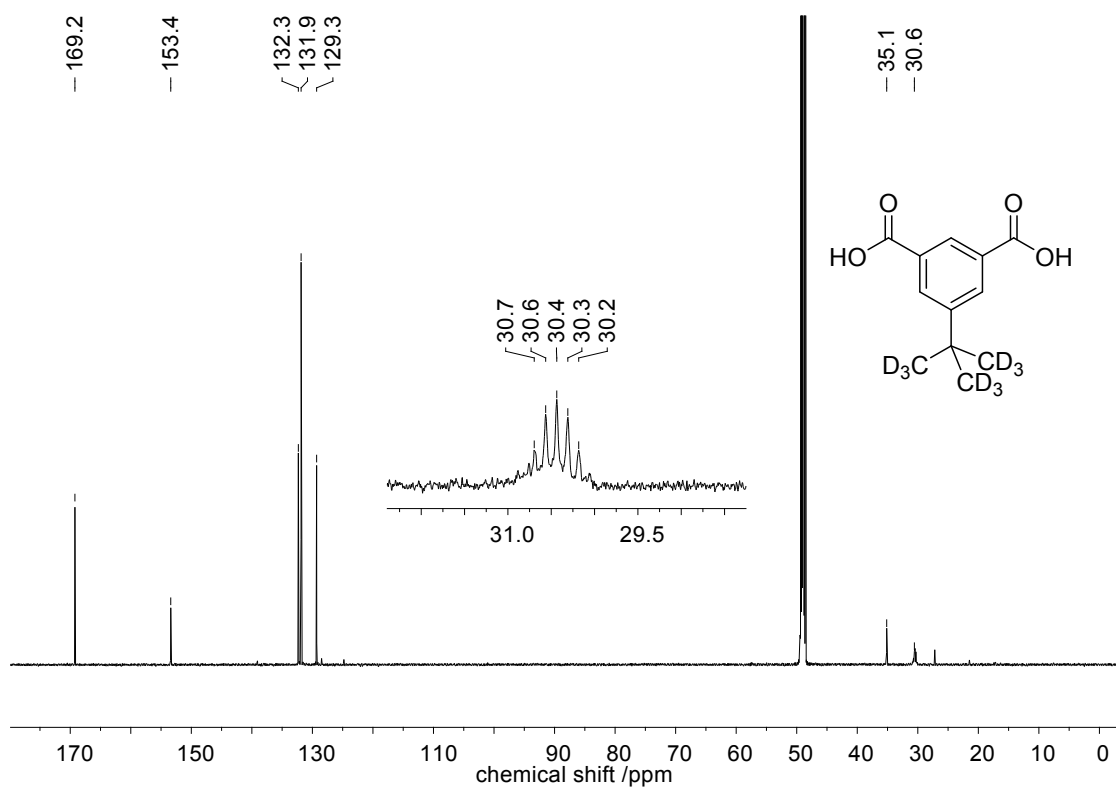

**Figure S9.** <sup>13</sup>C NMR spectrum (MeOD, 150 MHz) of 5-(*tert*-butyl)isophthalic acid-d<sub>9</sub>.

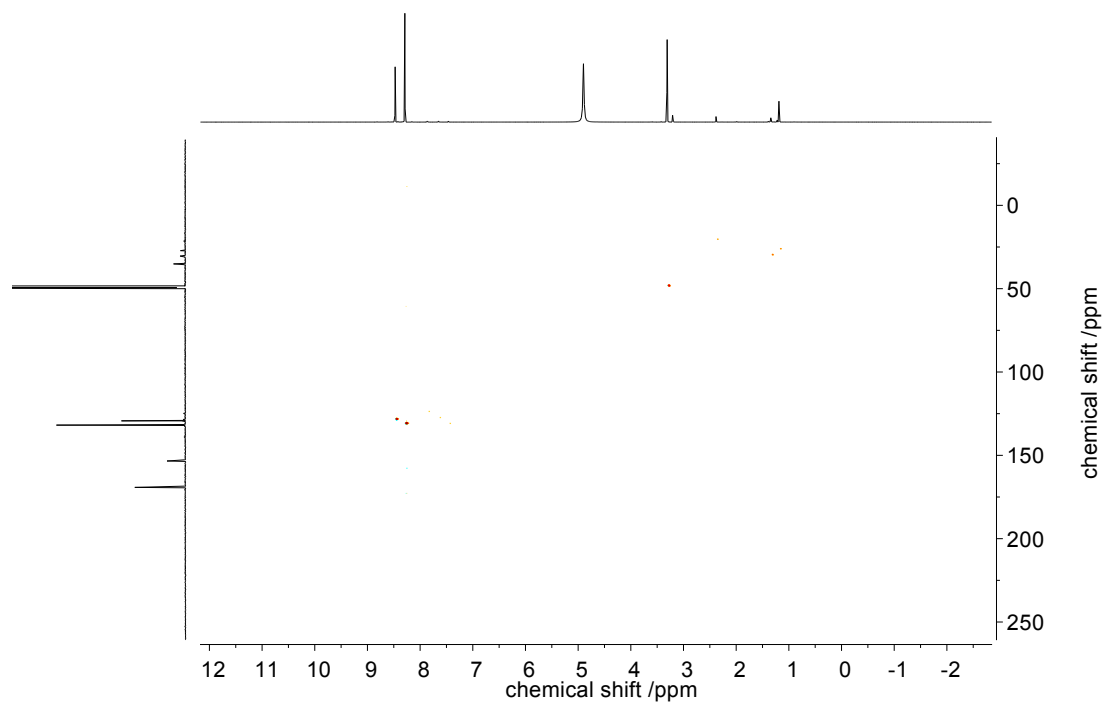

**Figure S10.** HSQC NMR spectrum (MeOD, 600 MHz) of 5-(*tert*-butyl)isophthalic acid-d<sub>9</sub>.

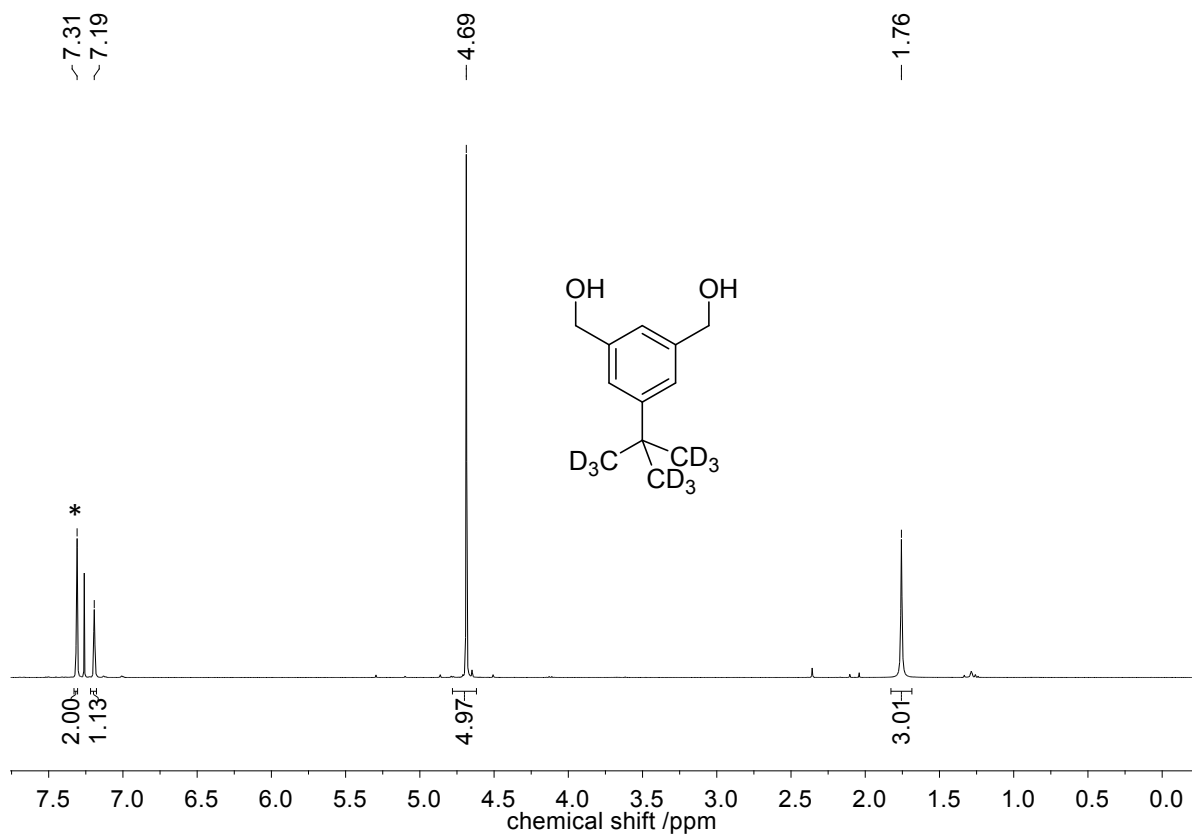

**Figure S11.**  $^1\text{H}$  NMR spectrum ( $\text{CDCl}_3$ , 400 MHz) of (5-(*tert*-butyl)-1,3-dihydroxymethylenebenzene- $d_9$ ). \* $\text{CHCl}_3$ .

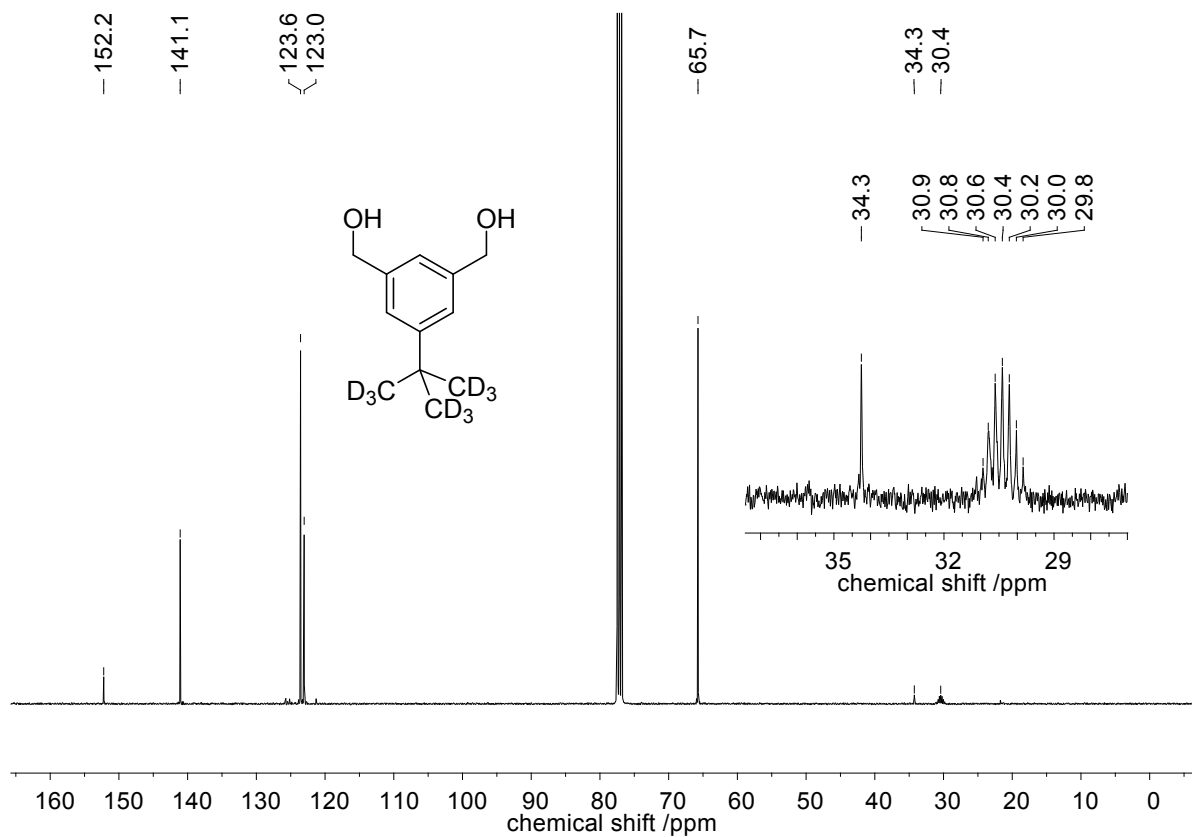

**Figure S12.**  $^{13}\text{C}$  NMR spectrum ( $\text{CDCl}_3$ , 100 MHz) of (5-(*tert*-butyl)-1,3-dihydroxymethylenebenzene-d<sub>9</sub>).

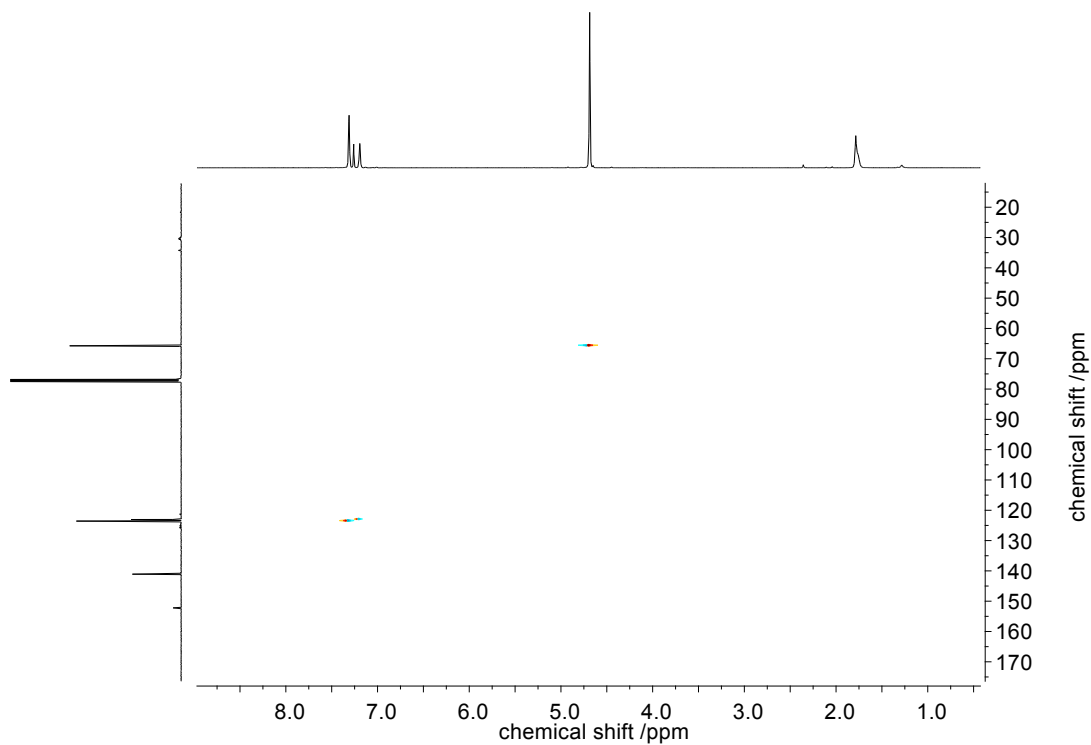

**Figure S13.** HSQC NMR spectrum ( $\text{CDCl}_3$ , 400 MHz) of (5-(*tert*-butyl)-1,3-dihydroxymethylenebenzene-d<sub>9</sub>).

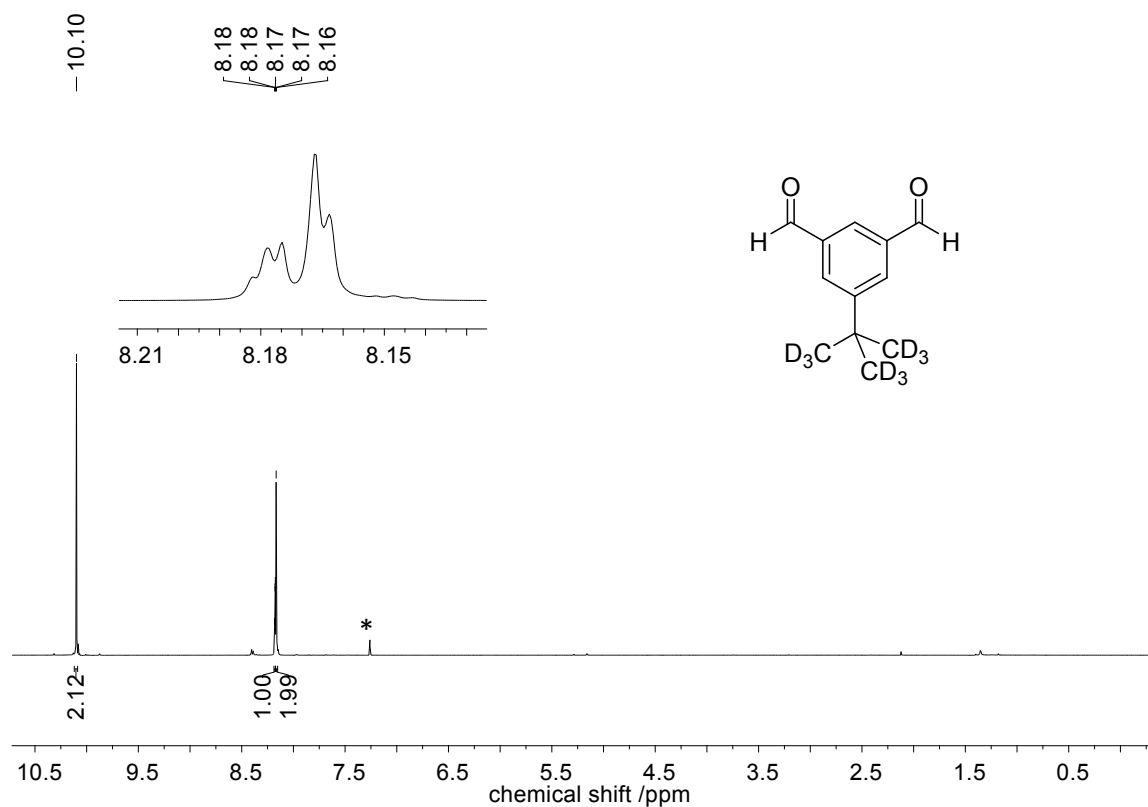

**Figure S14.**  $^1\text{H}$  NMR spectrum ( $\text{CDCl}_3$ , 400 MHz) of **1-d<sub>9</sub>**. \* $\text{CHCl}_3$ .



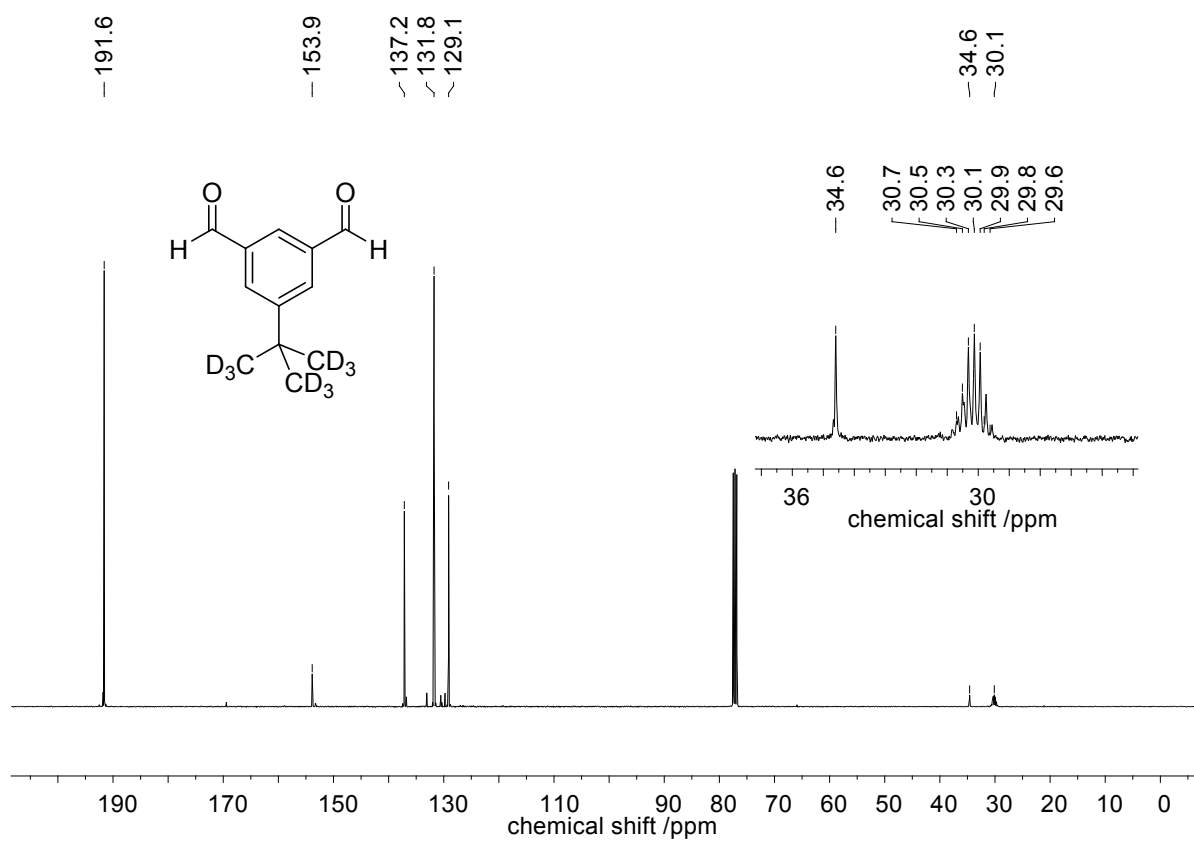

**Figure S15.** <sup>13</sup>C NMR spectrum (CDCl<sub>3</sub>, 100 MHz) of **1d-9**.

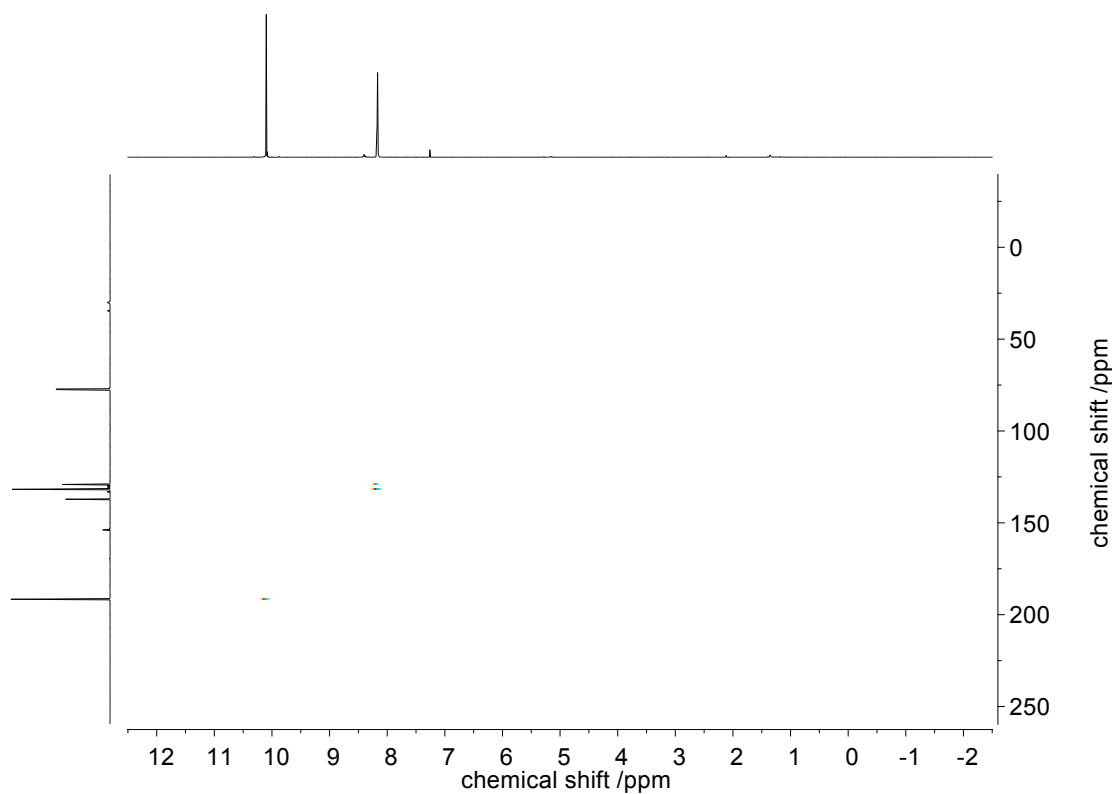

**Figure S16.** HSQC NMR spectrum (CDCl<sub>3</sub>, 400 MHz) of **1d-9**.

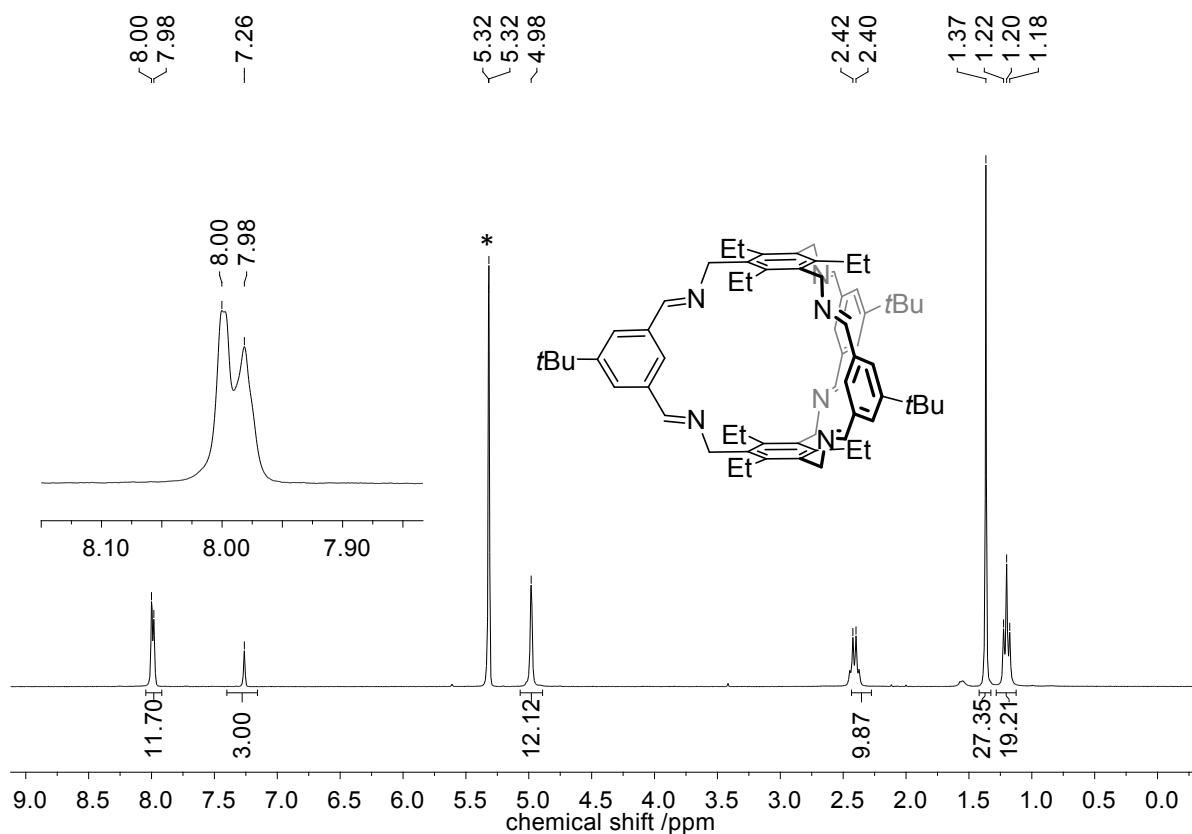

**Figure S17.**  $^1\text{H}$  NMR spectrum of cage **4** ( $\text{CD}_2\text{Cl}_2$ , 600 MHz).  $^*\text{CH}_2\text{Cl}_2$ .

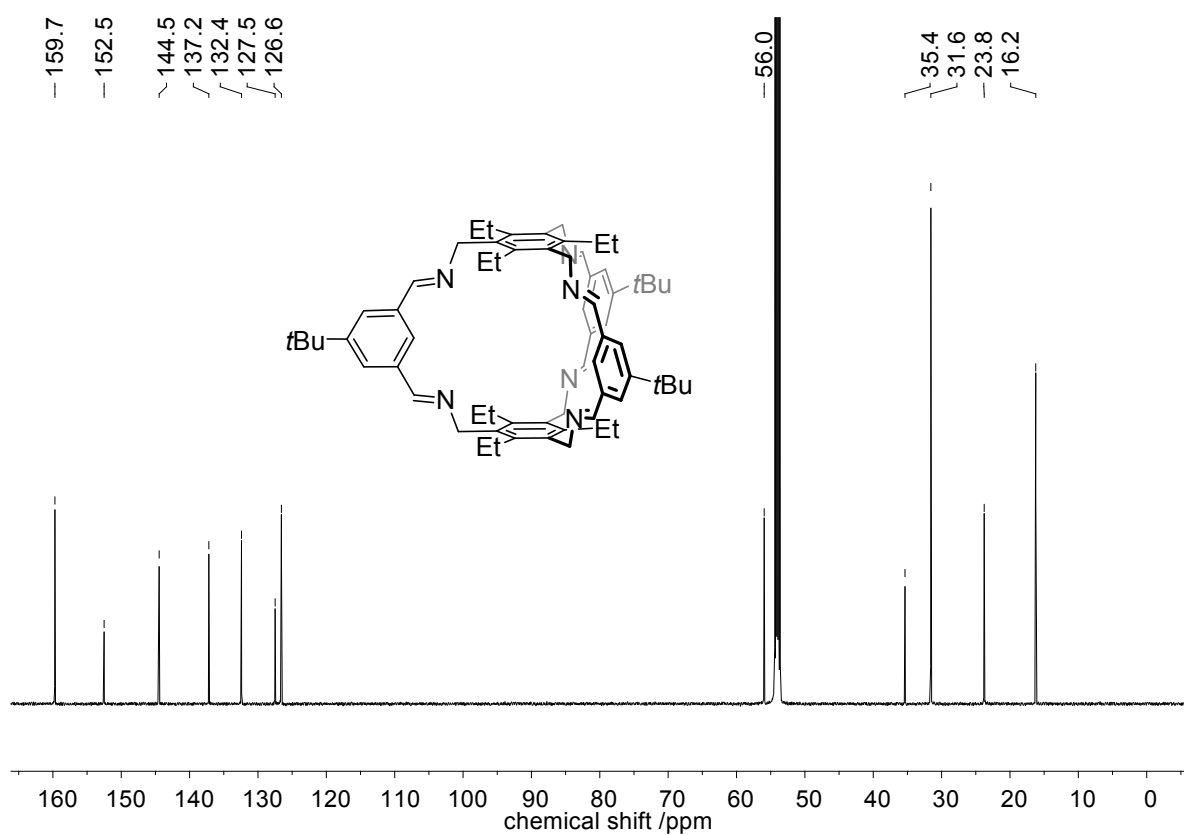

**Figure S18.**  $^{13}\text{C}$  NMR spectrum ( $\text{CD}_2\text{Cl}_2$ , 150 MHz) of cage **4**.

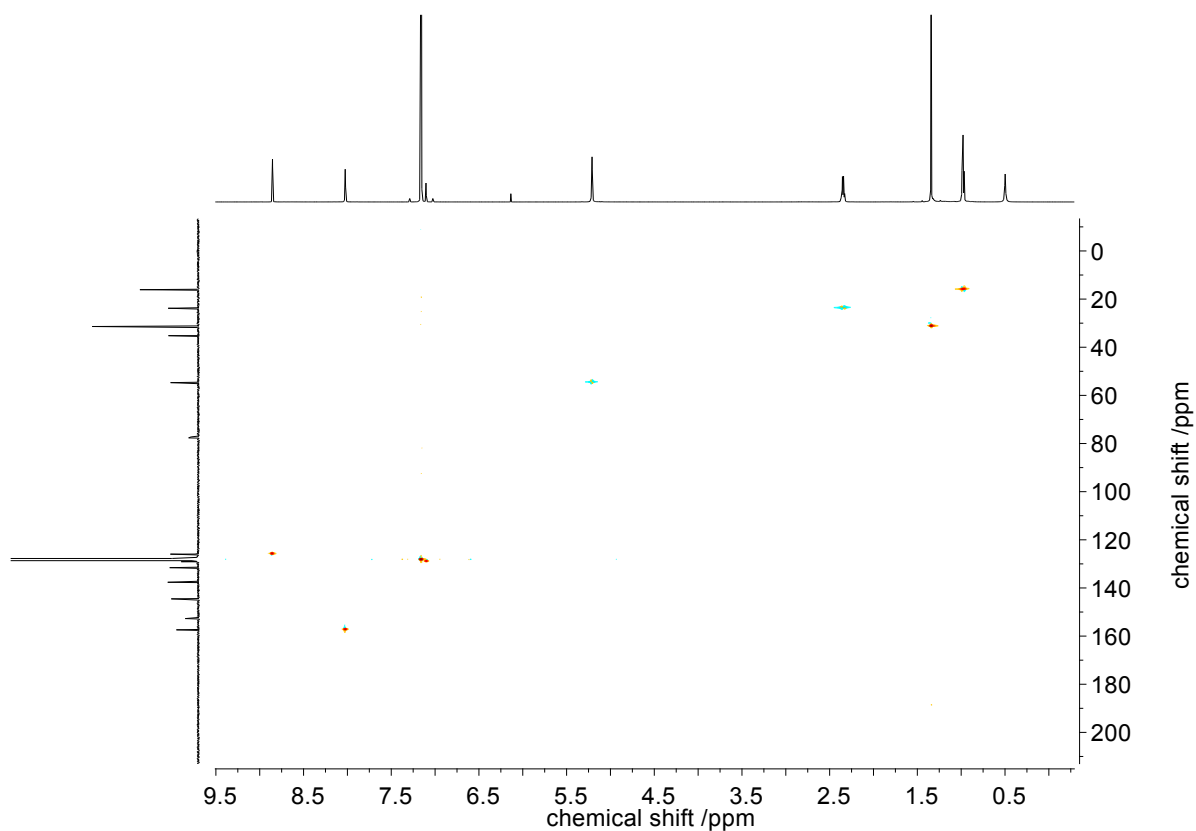

**Figure S19.** HSQC NMR spectrum of cage **4** ( $C_6D_6$ , 600/150 MHz).

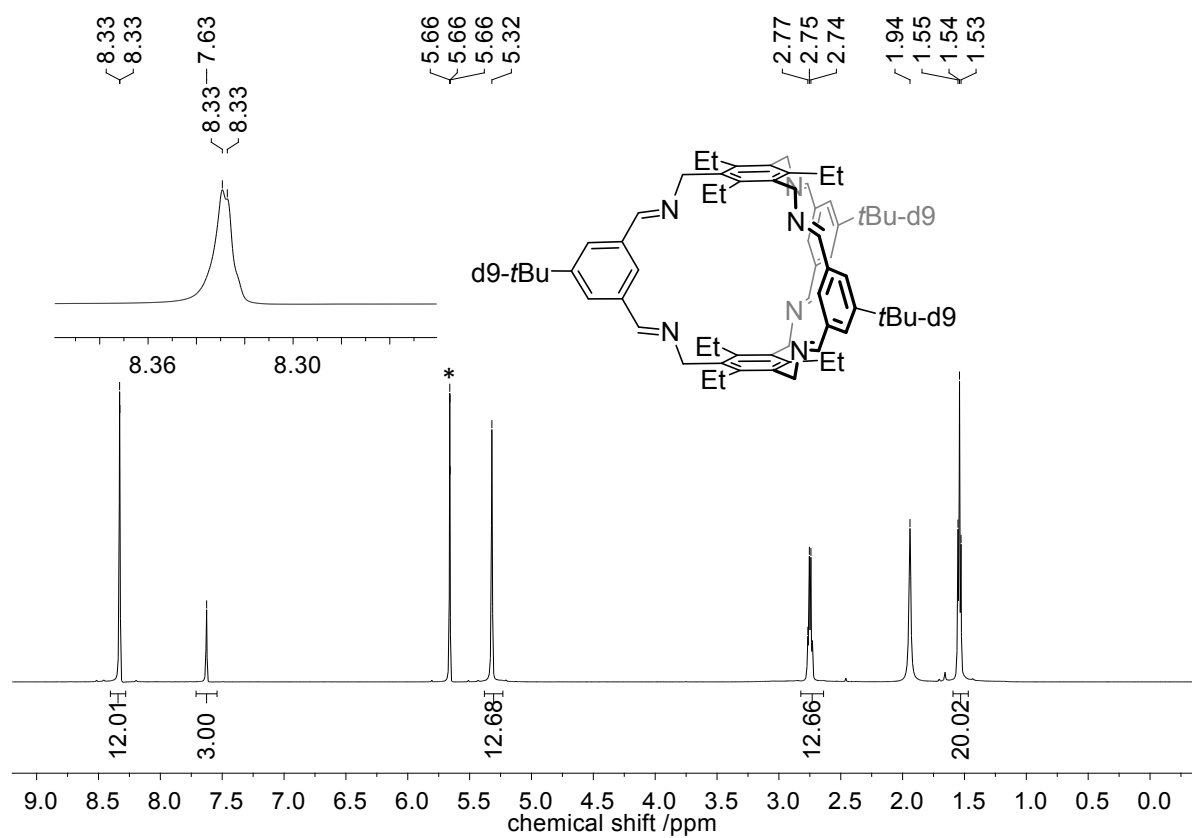

**Figure S20.**  $^1H$  NMR spectrum ( $CD_2Cl_2$ , 600 MHz) of cage **4-d9**. \* $CH_2Cl_2$ .

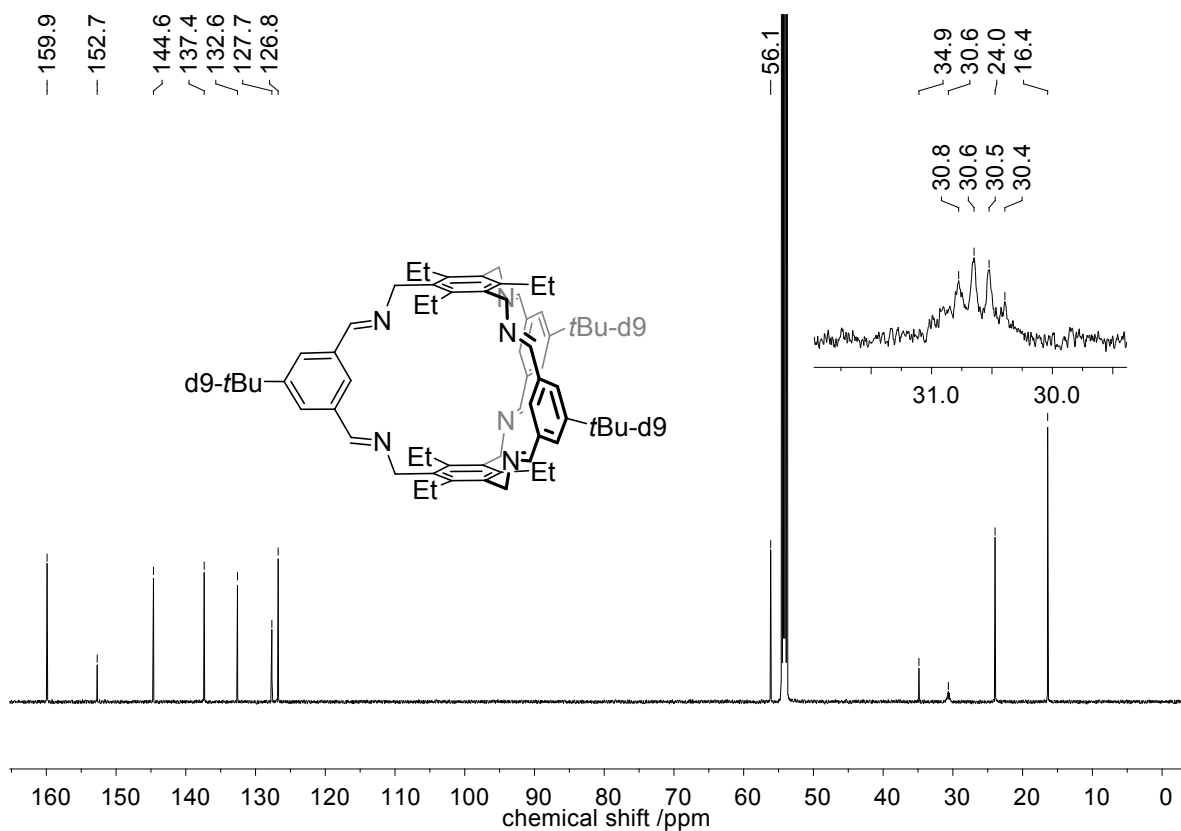

**Figure S21.**  $^{13}\text{C}$  NMR spectrum ( $\text{CD}_2\text{Cl}_2$ , 150 MHz) of cage **4-d9**.

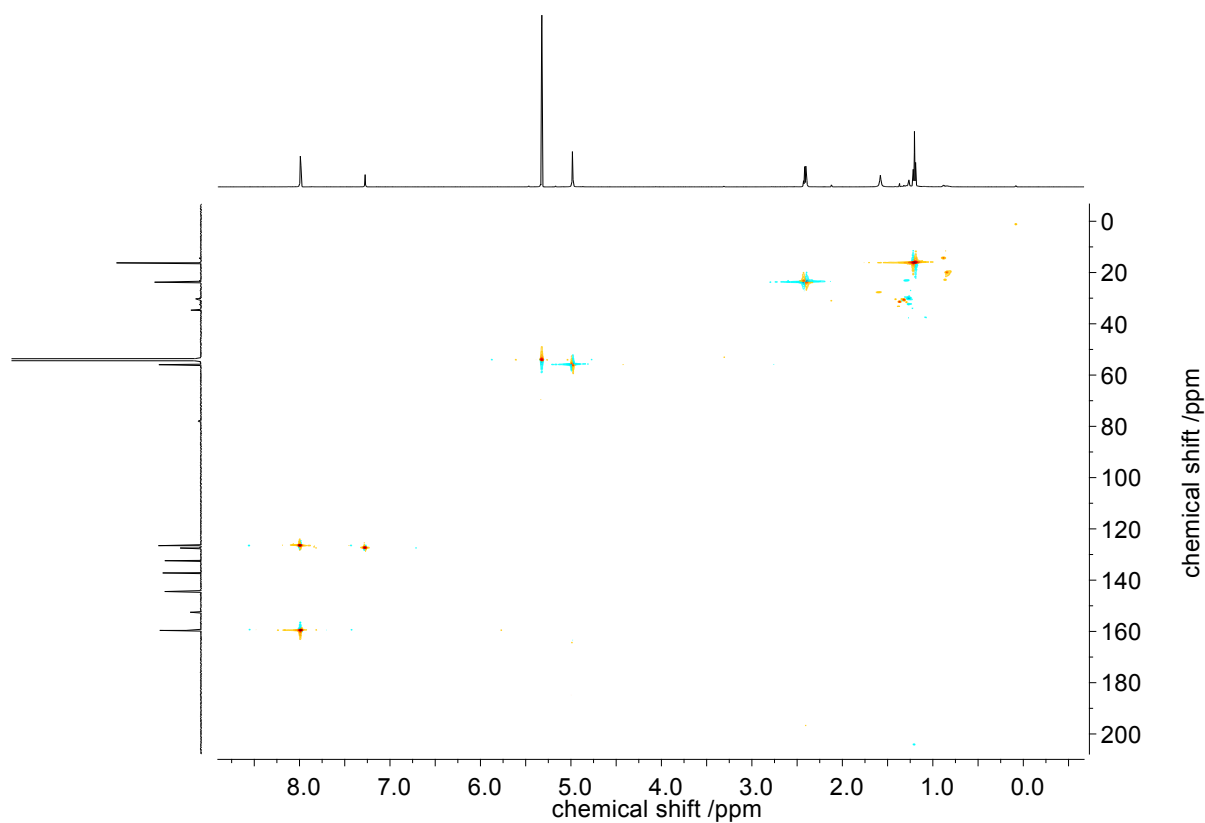

**Figure S22.** HSQC NMR spectrum ( $\text{CD}_2\text{Cl}_2$ , 600 MHz) of compound **4-d9**.

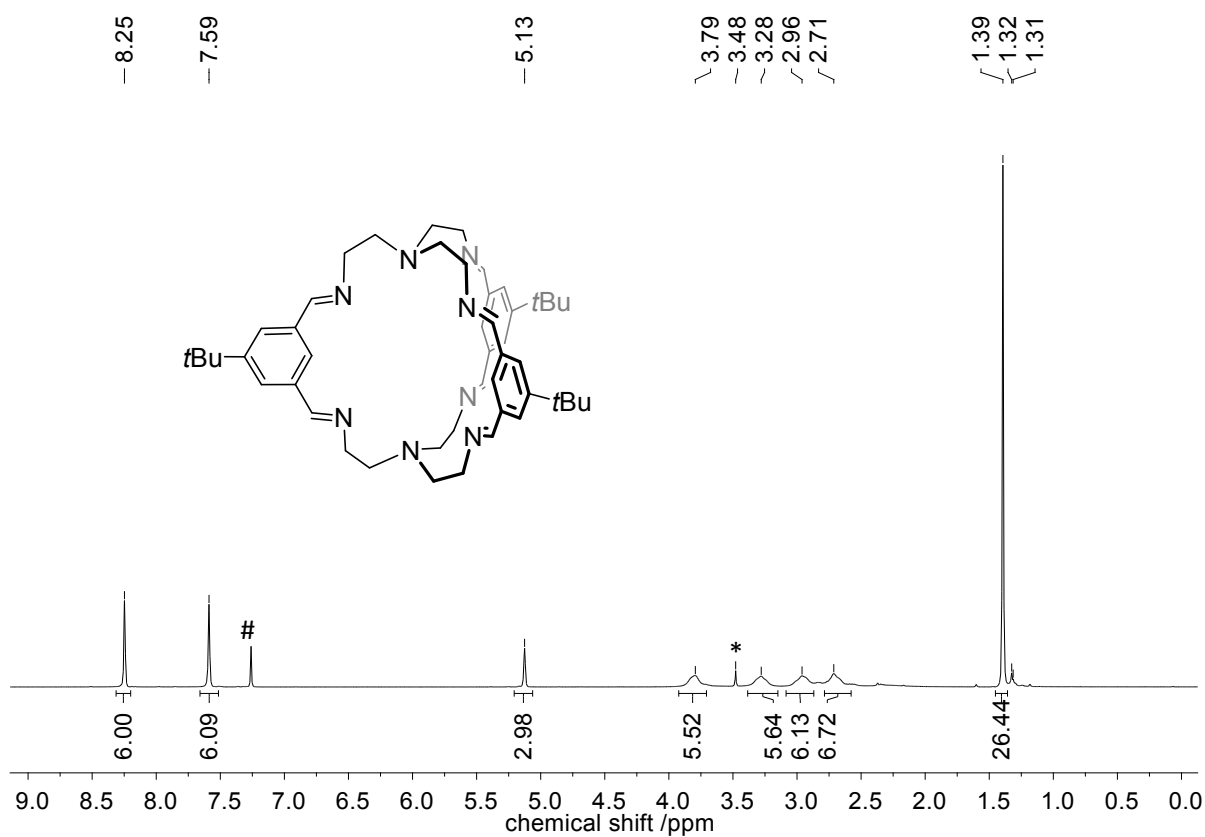

**Figure S23.** <sup>1</sup>H NMR spectrum (CDCl<sub>3</sub>, 300 MHz) of cage 5. #CHCl<sub>3</sub>\*MeOH.

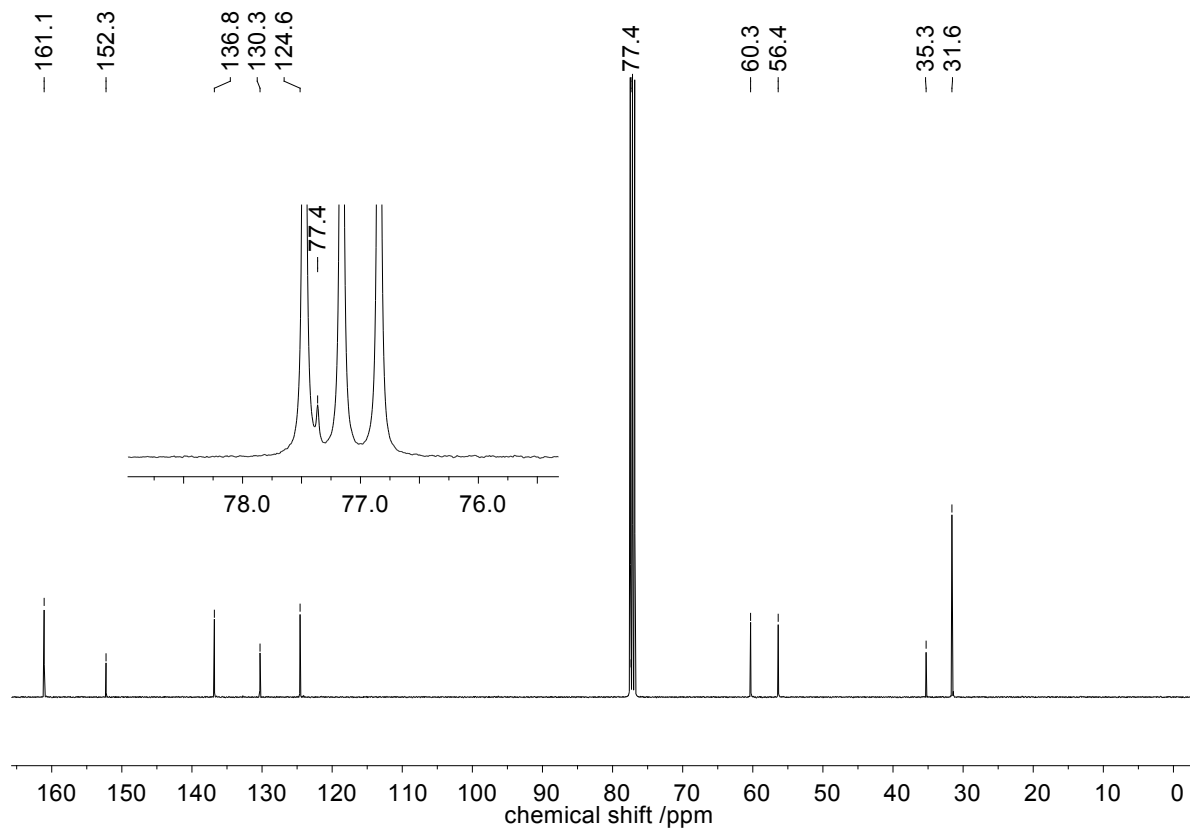

**Figure S24.** <sup>13</sup>C NMR spectrum (CDCl<sub>3</sub>, 100 MHz) of cage 5.

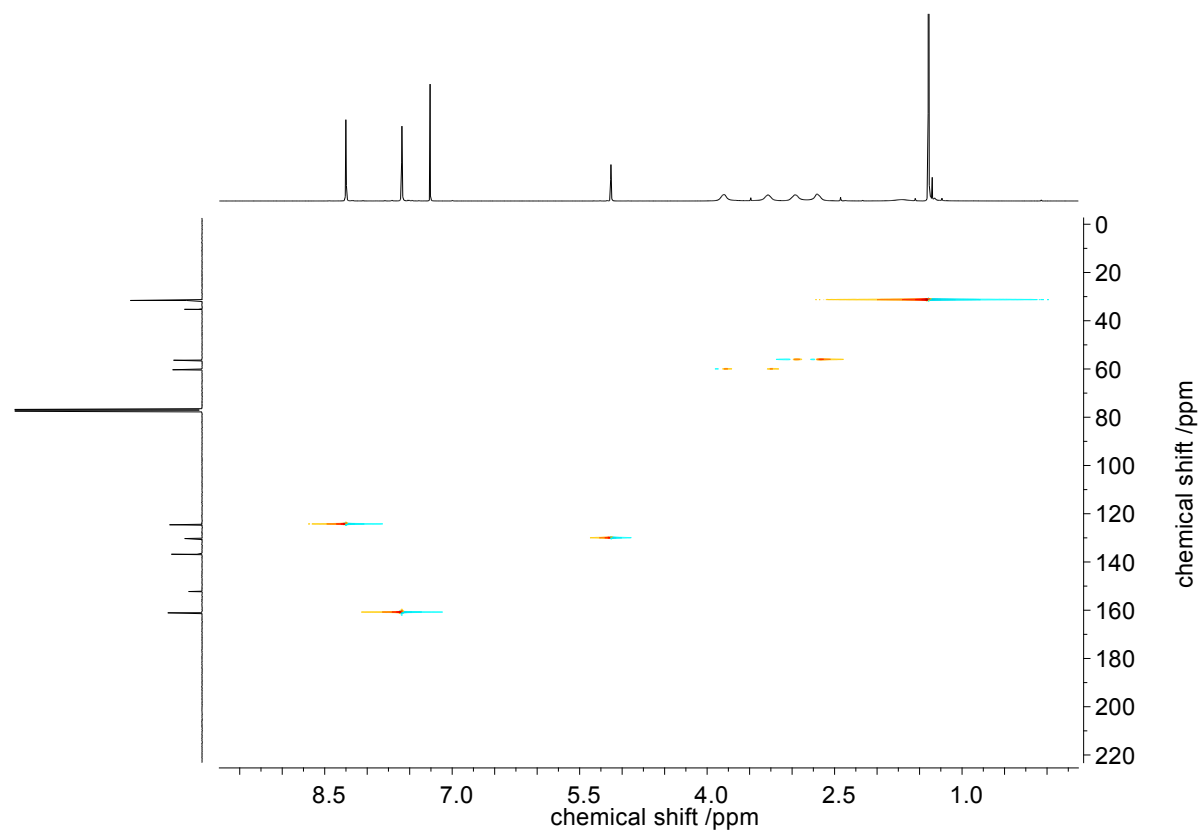

**Figure S25.** HSQC NMR spectrum ( $\text{CDCl}_3$ , 300 MHz) of compound **5**.

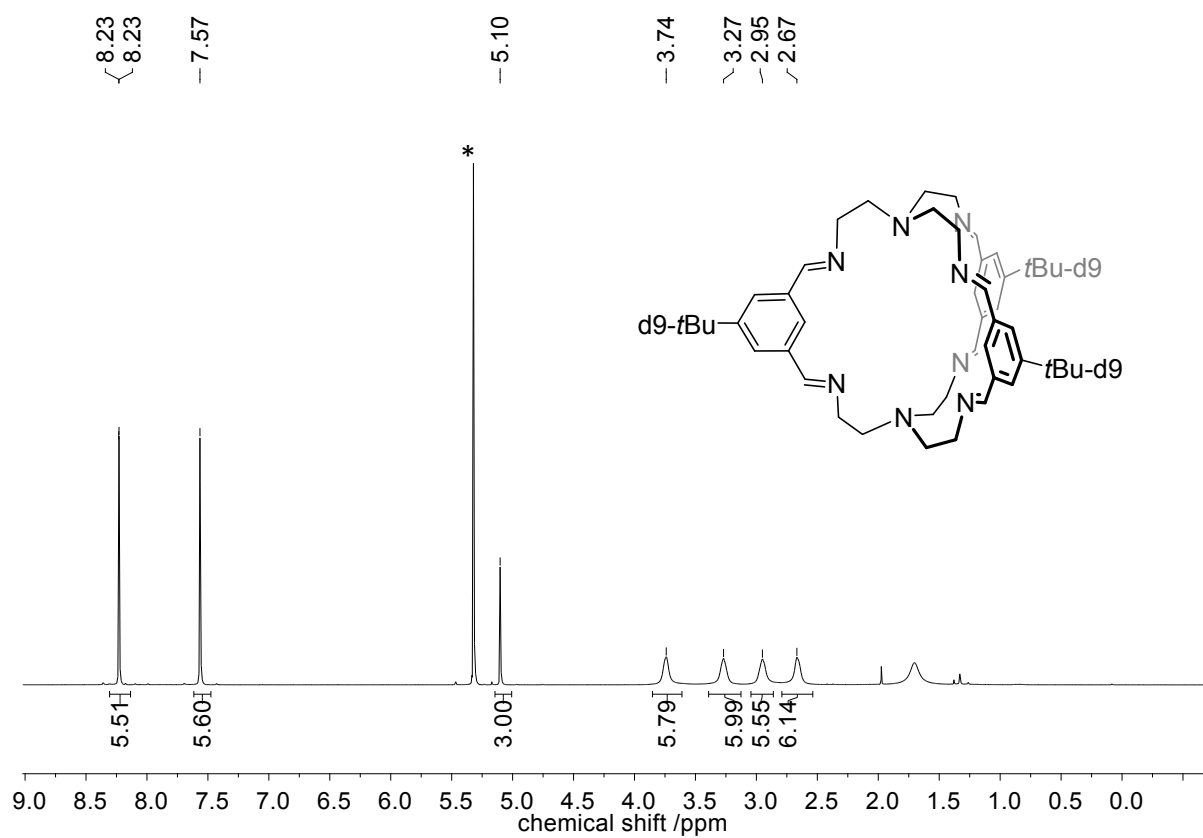

**Figure S26.**  $^1\text{H}$  NMR spectrum ( $\text{CD}_2\text{Cl}_2$ , 600 MHz) of cage **5-d9**.  $^*\text{CH}_2\text{Cl}_2$

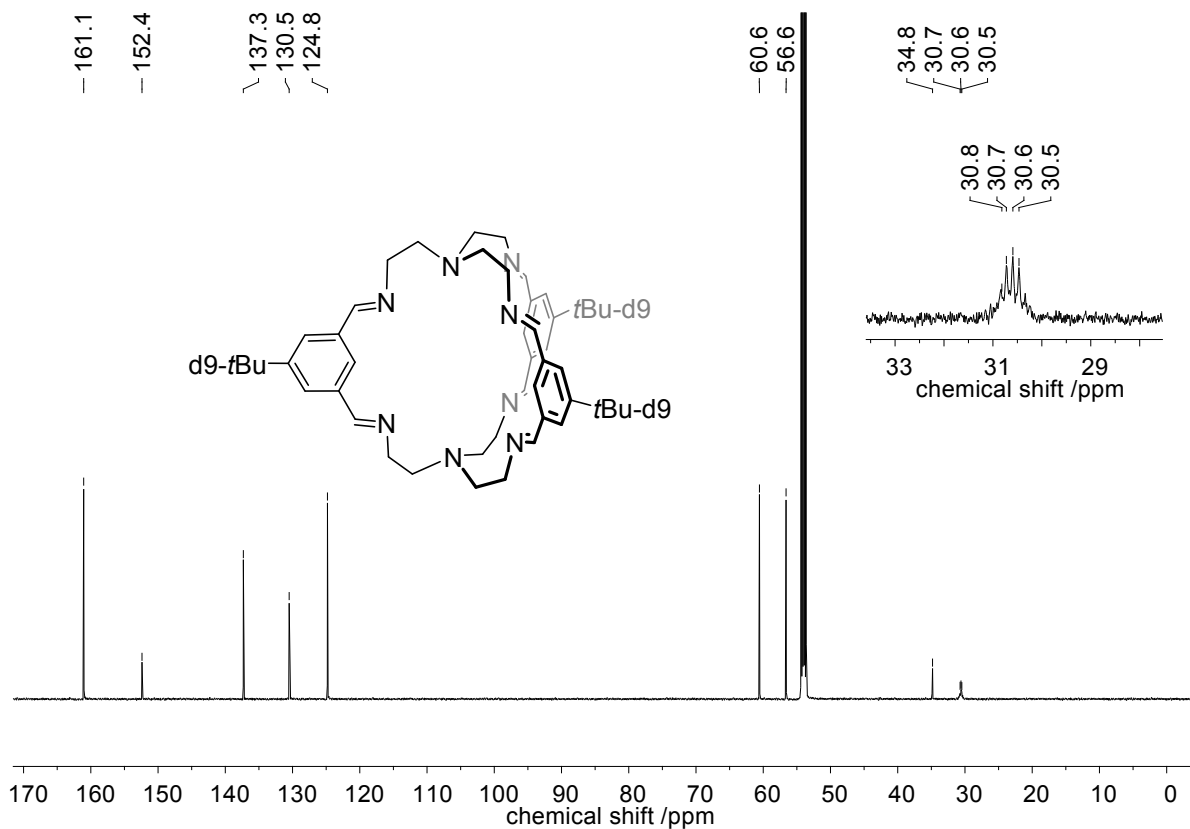

**Figure S27.**  $^{13}\text{C}$  NMR spectrum ( $\text{CD}_2\text{Cl}_2$ , 150 MHz) of compound **5-d9**.

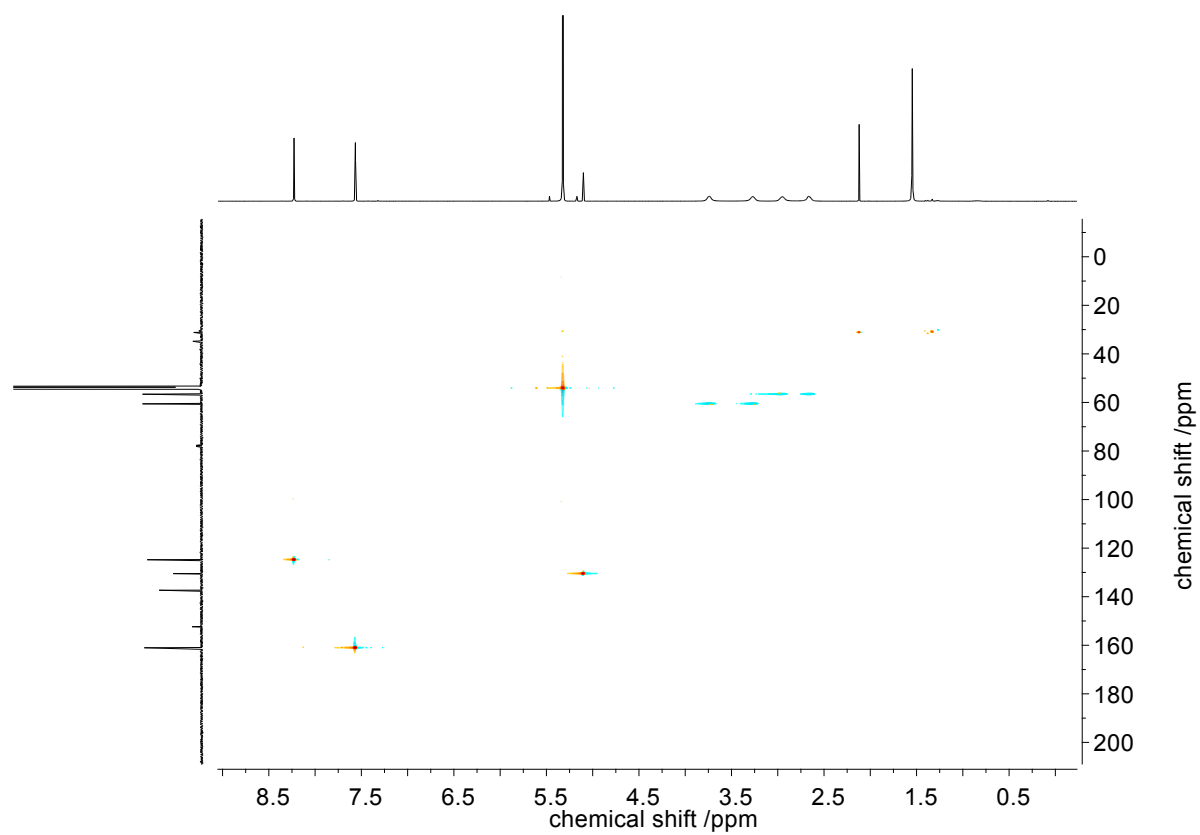

**Figure S28.** HSQC NMR spectrum ( $\text{CD}_2\text{Cl}_2$ , 600 MHz) of compound **5-d9**.

## 2. DOSY Experiments

DOSY NMR experiments were calibrated using known self-diffusion values for the solvents used ( $D_{solv}$ ).<sup>26</sup> The solvodynamic radii were estimated using the semi-empirical modification of the Stokes-Einstein equation proposed by Chen and Chen.<sup>27</sup> This equation was solved for  $r_s$  using values of  $r_{solv}$  and  $\eta$  from the literature.<sup>28</sup>

$$D = \frac{k_B T}{\left( \frac{6}{1 + 0.695 \left( \frac{r_{solv}}{r_s} \right)^{2.234}} \right) \pi \eta r_s}$$

$D$  is the measured diffusion coefficient ( $\text{m}^2 \cdot \text{s}^{-1}$ )

$k_B$  is Boltzmann constant ( $1.3806485 \cdot 10^{-23} \text{ m}^2 \cdot \text{kg} \cdot \text{s}^{-2} \cdot \text{K}^{-1}$ )

$T$  is the temperature (K)

$r_{solv}$  is the hydrodynamic radius of the solvent (m)

$r_s$  is the hydrodynamic radius of the analyte (m)

$\eta$  is the viscosity of the solvent at temperature  $T$  ( $\text{kg} \cdot \text{m}^{-1} \cdot \text{s}^{-1}$ )

**Table S1:** Estimation of the hydrodynamic radius of cage compounds ( $r_h$ ) in the corresponding solvents using parameters from literature and diffusion coefficients measured by DOSY NMR.

| Compound | T [K] | Solvent                | $D_{solv} \cdot 10^{-9}$ [ $\text{m}^2 \cdot \text{s}^{-1}$ ] | $r_{solv}$ [nm] | $\eta \cdot 10^{-3}$ [ $\text{kg} \cdot \text{m}^{-1} \cdot \text{s}^{-1}$ ] | $D \cdot 10^{-10}$ [ $\text{m}^2 \cdot \text{s}^{-1}$ ] | $r_h$ [nm] |
|----------|-------|------------------------|---------------------------------------------------------------|-----------------|------------------------------------------------------------------------------|---------------------------------------------------------|------------|
| 4        | 298   | $\text{C}_6\text{D}_6$ | 2.18                                                          | 0.270           | 0.603                                                                        | 4.89                                                    | 0.73       |
| 5        | 298   | $\text{CDCl}_3$        | 2.45                                                          | 0.260           | 0.542                                                                        | 6.31                                                    | 0.63       |



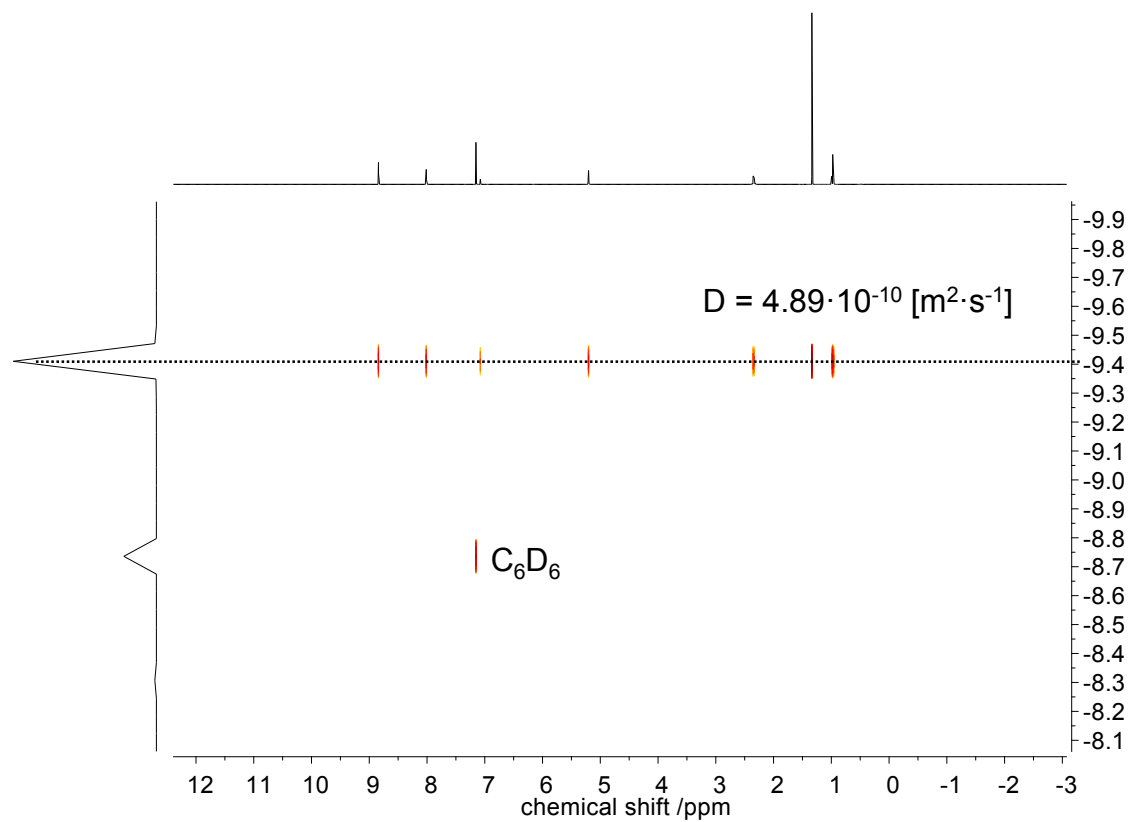

**Figure S29.** DOSY NMR spectrum of compound **4** ( $\text{C}_6\text{D}_6$ , 298 K, 400 MHz).

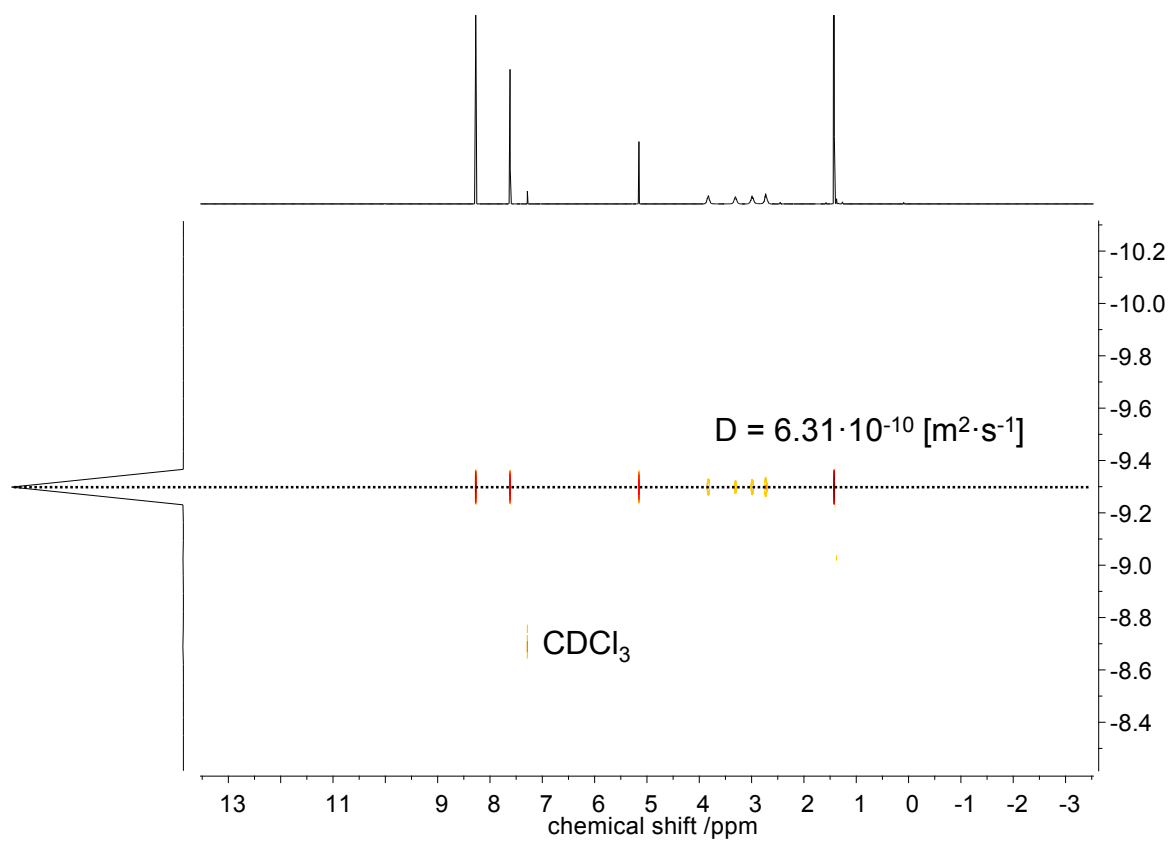

**Figure S30.** DOSY NMR spectrum of compound **5** ( $\text{CDCl}_3$ , 298 K, 400 MHz).

### 3. Mass Spectra

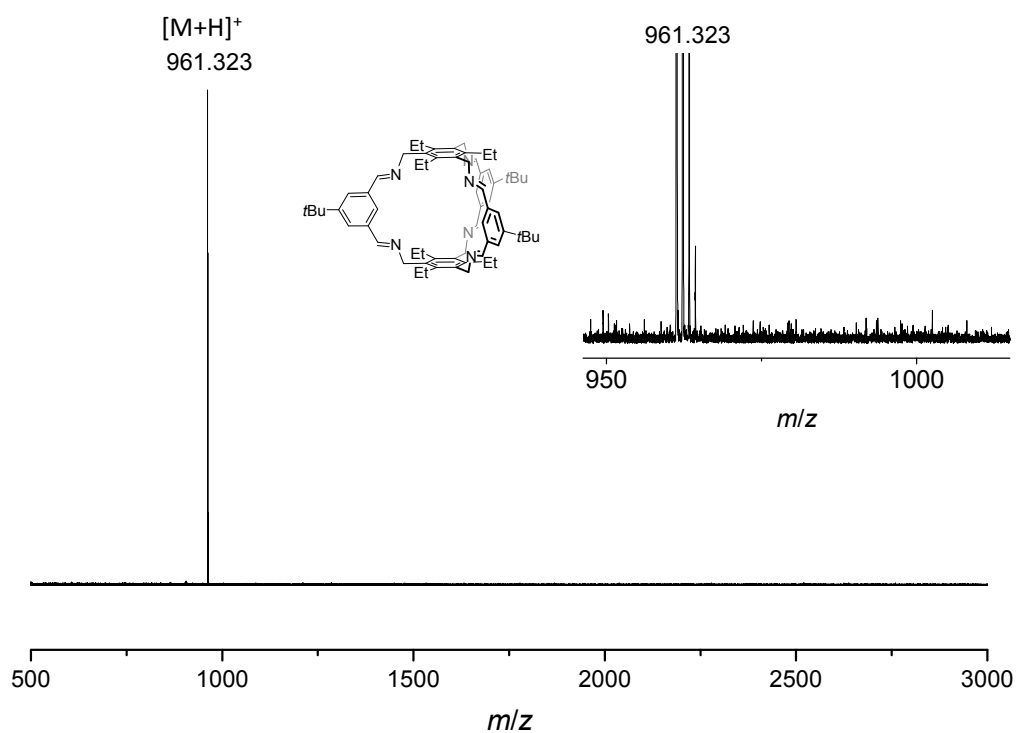

**Figure S31.** MALDI-TOF MS (DCTB) of cage 4. The isotopic pattern of the signal at  $m/z = 961.323$  in the zoomed spectrum is not visible since the signal was cut due to its high intensity.

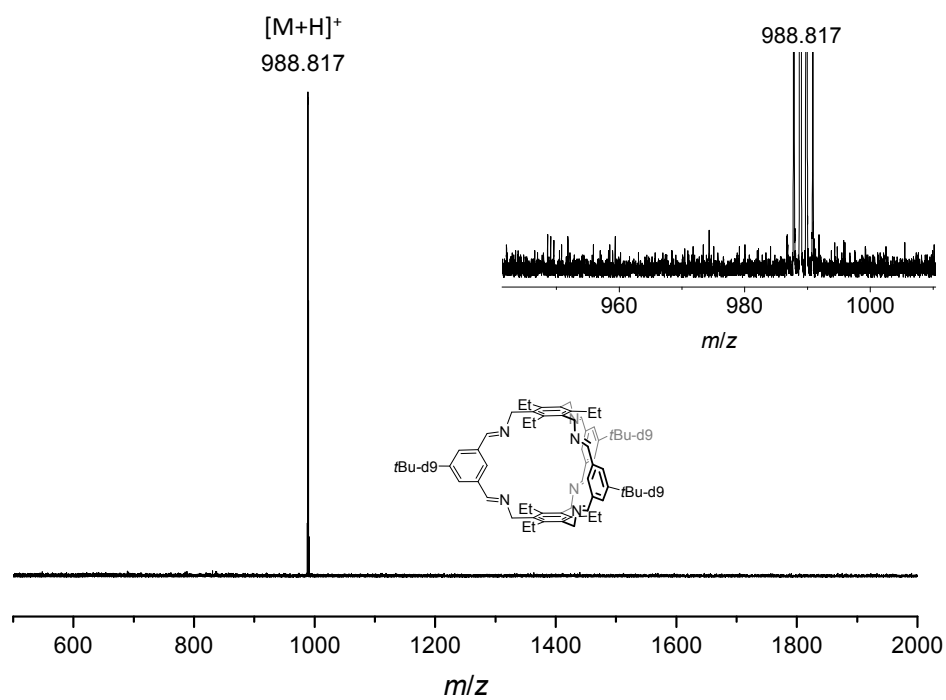

**Figure S32.** MALDI-TOF MS (DCTB) of cage 4-d<sub>27</sub>. The isotopic pattern of the signal at  $m/z = 988.817$  in the zoomed spectrum is not visible since the signal was cut due to its high intensity.

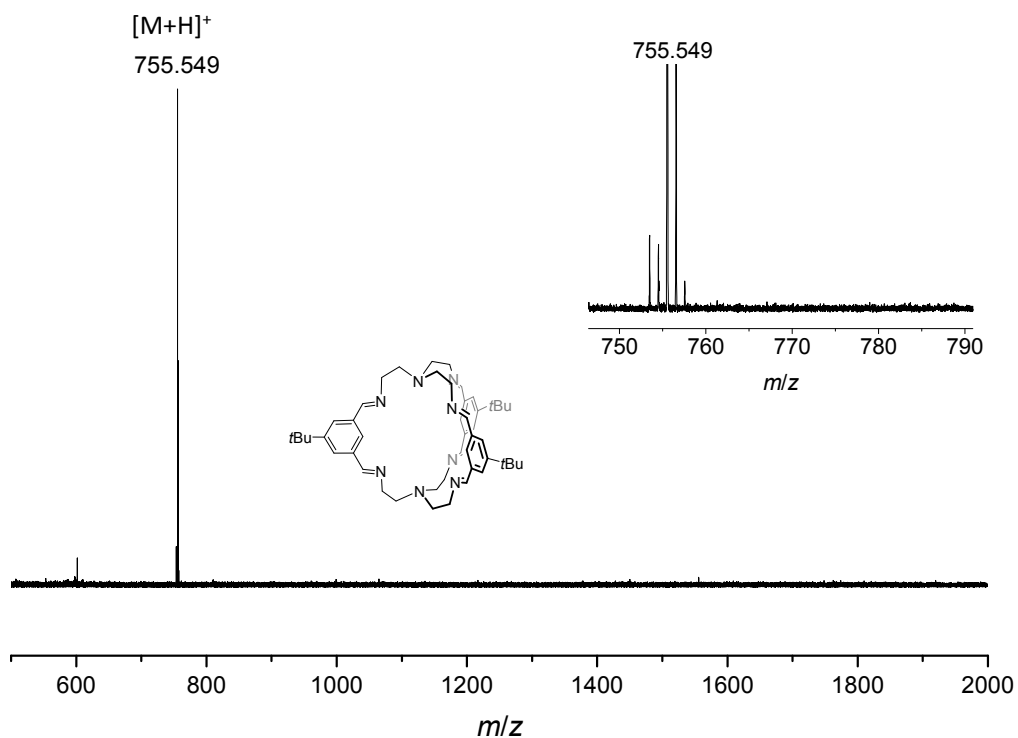

**Figure S33.** MALDI-TOF MS (DCTB) of cage 5. The isotopic pattern of the signal at  $m/z = 755.549$  in the zoomed spectrum is not visible since the signal was cut due to its high intensity.

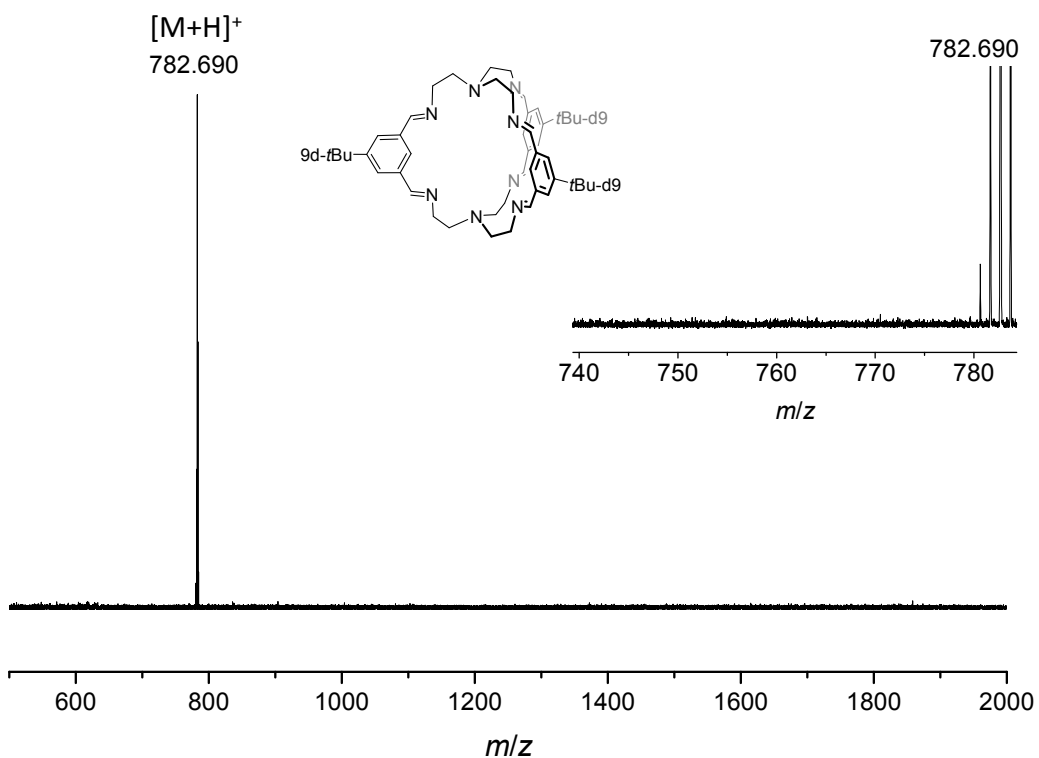

**Figure S34.** MALDI-TOF MS (DCTB) of cage 5-d27. The isotopic pattern of the signal at  $m/z = 782.690$  in the zoomed spectrum is not visible since the signal was cut due to its high intensity.

#### 4. Infrared Spectra

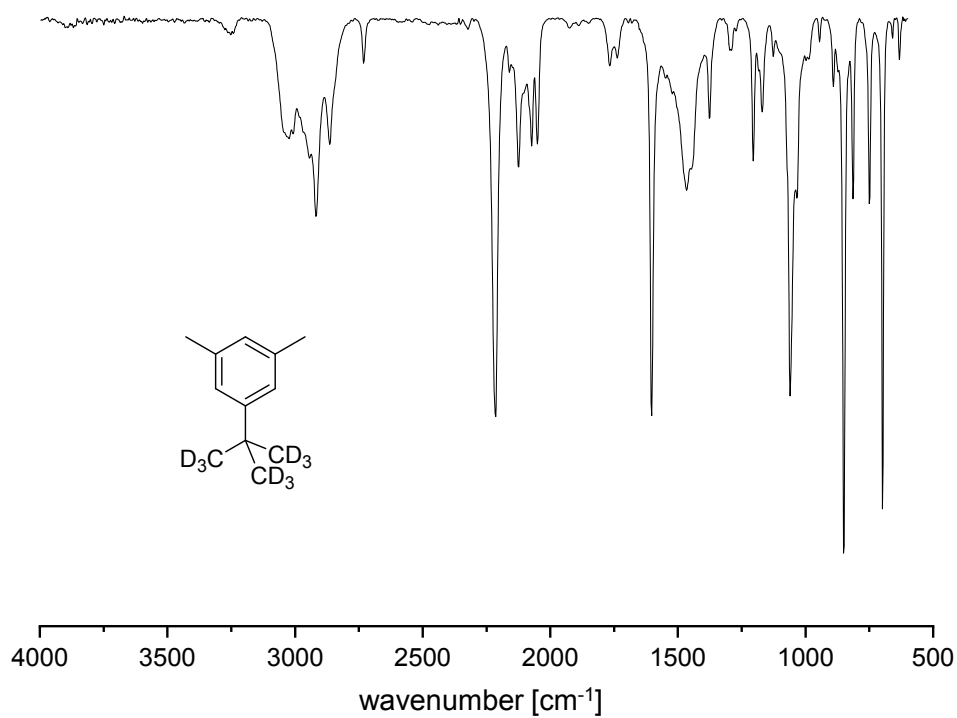

**Figure S35.** IR spectrum (ATR) of 1-(*tert*-butyl)-3,5-dimethyl-benzene-d<sub>9</sub>.

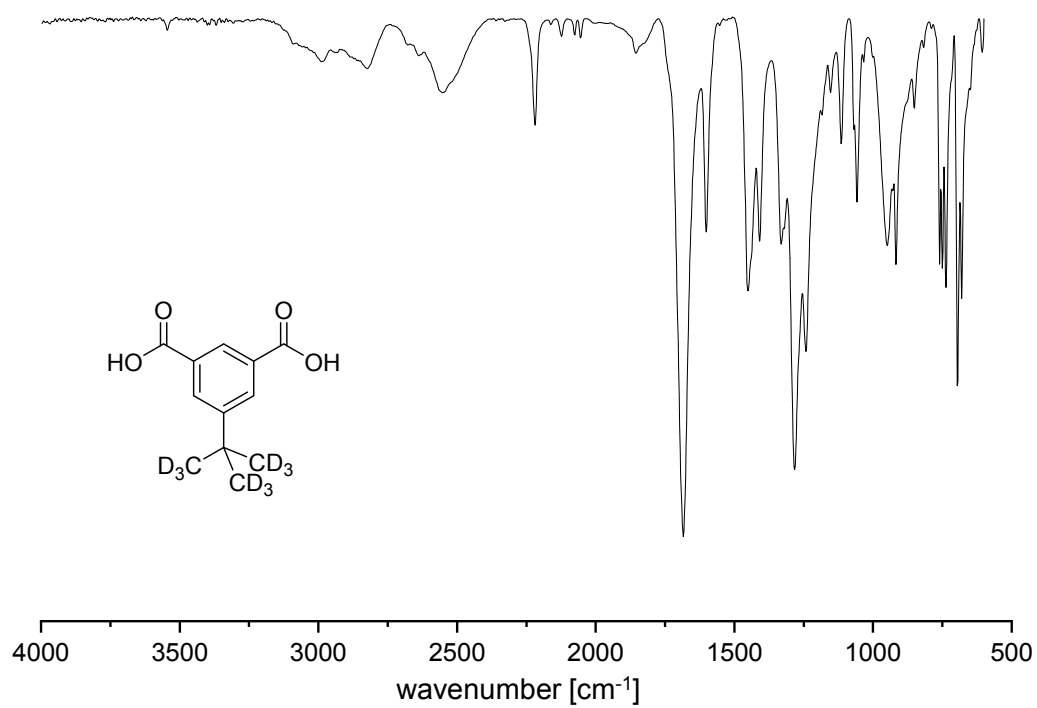

**Figure S36.** IR spectrum (ATR) of 5-(*tert*-butyl)isophthalic acid-d<sub>9</sub>.

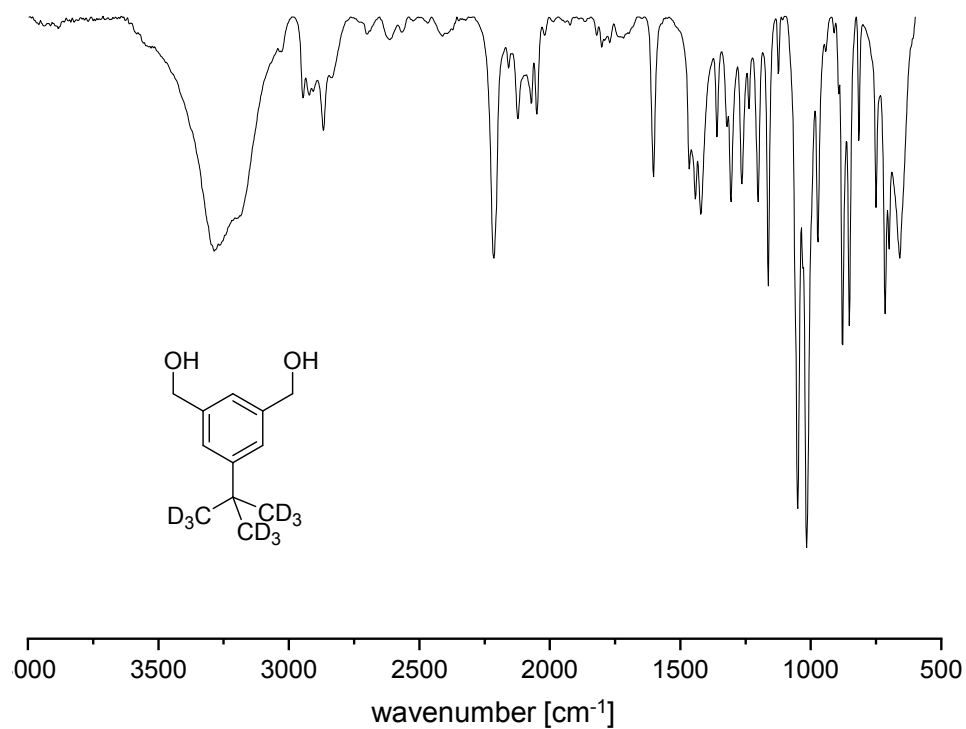

**Figure S37.** IR spectrum (ATR) of (5-(*tert*-butyl)-1,3-dihydroxymethylenebenzene-d<sub>9</sub>).

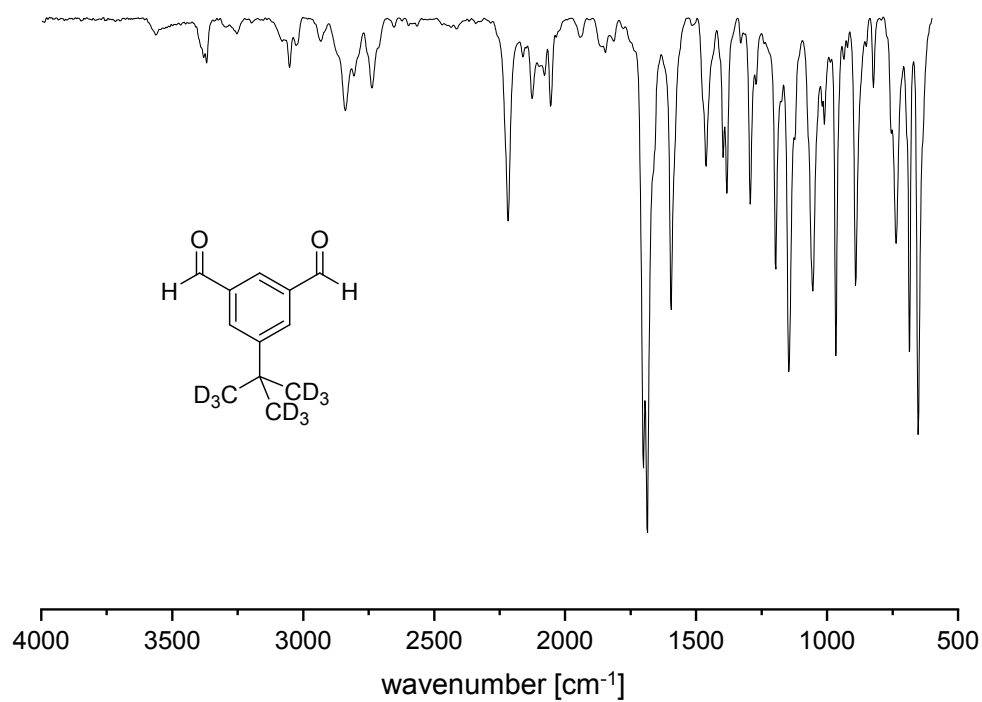

**Figure S38.** IR spectrum (ATR) of compound 1-d<sub>9</sub>.

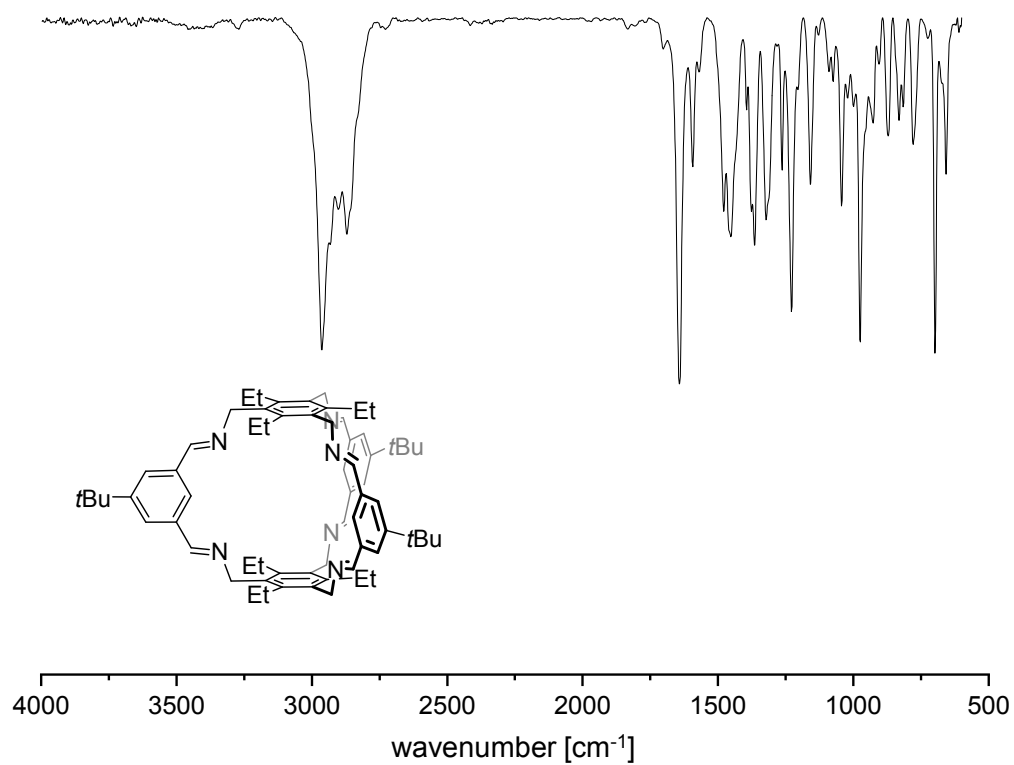

**Figure S39.** IR spectrum (ATR) of cage compound 4.

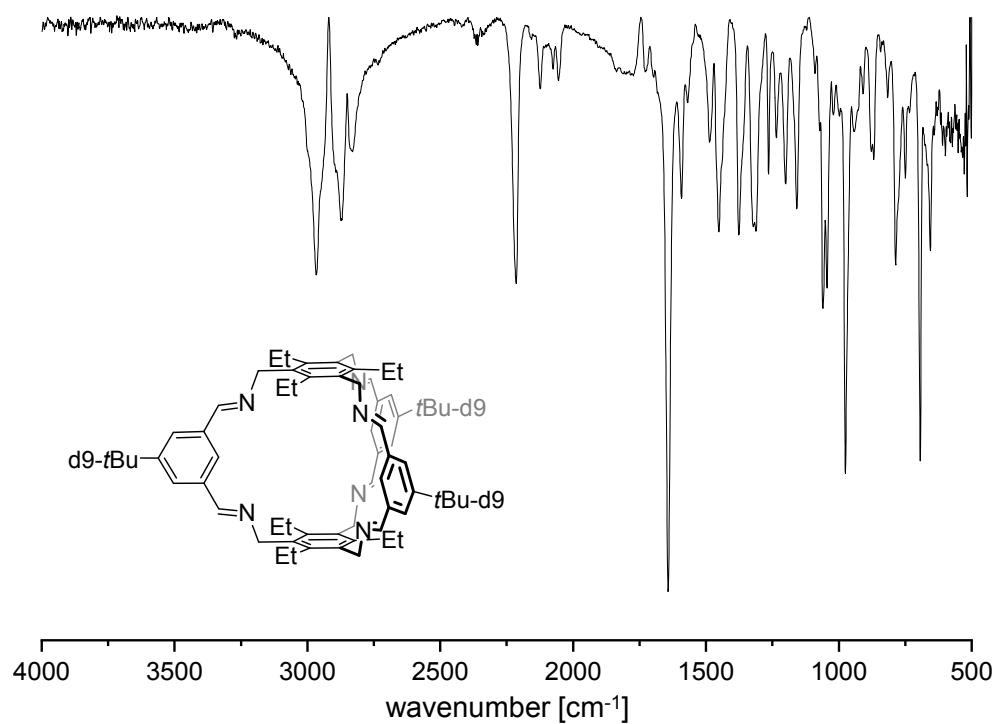

**Figure S40.** IR spectrum (ATR) of cage compound 4-d<sub>9</sub>.

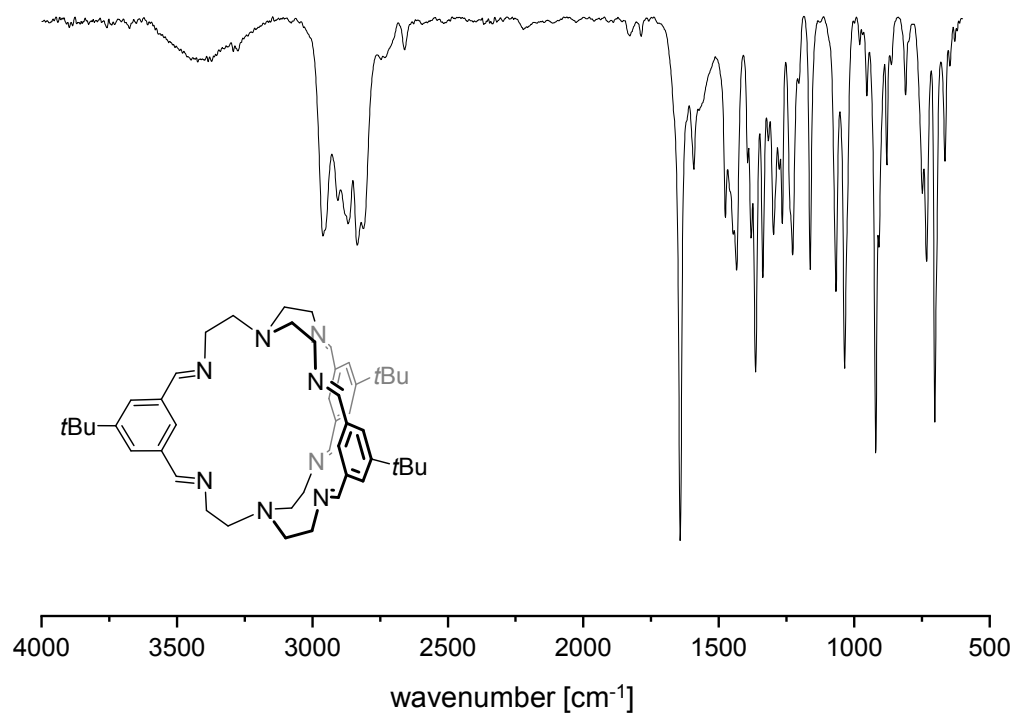

**Figure S41.** IR spectrum (ATR) of cage compound **5**.

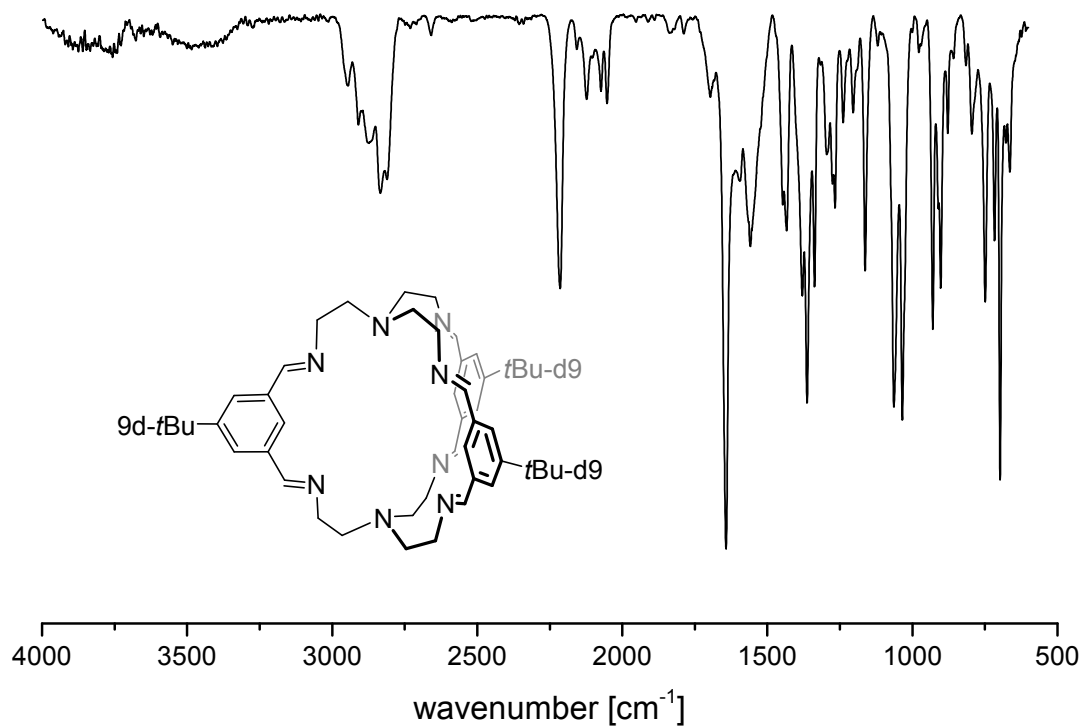

**Figure S42.** IR spectrum (ATR) of cage compound **5d-9**.

## 5. Single-crystal X-ray Diffraction Data

### Crystal structure of compound 4-d27

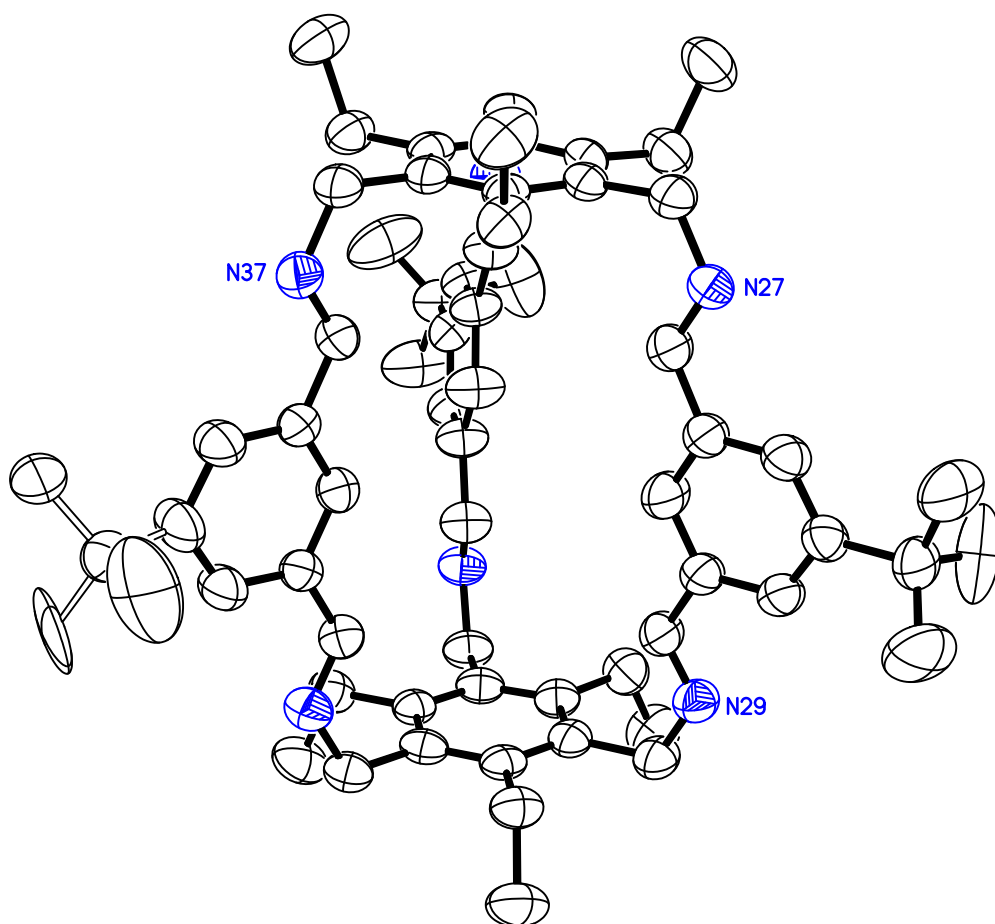

**Figure S43.** Crystal structure of compound 4-d27. Atoms of carbon are depicted in white and nitrogen in blue. Ellipsoid contour plot at a 50% probability level.



Crystals were obtained by slow evaporation of Benzene.

CCDC-number : 2016234

**Table S2:** Crystal data and structure refinement for **4-d27**.

---

|                                   |                                                                                                        |
|-----------------------------------|--------------------------------------------------------------------------------------------------------|
| Empirical formula                 | C <sub>90</sub> H <sub>108</sub> N <sub>6</sub>                                                        |
| Formula weight                    | 1273.82                                                                                                |
| Temperature                       | 200(2) K                                                                                               |
| Wavelength                        | 1.54178 Å                                                                                              |
| Crystal system                    | orthorhombic                                                                                           |
| Space group                       | Pnna                                                                                                   |
| Z                                 | 4                                                                                                      |
| Unit cell dimensions              | a = 29.9197(13) Å    α = 90 deg.<br>b = 21.7163(8) Å    β = 90 deg.<br>c = 12.1918(4) Å    γ = 90 deg. |
| Volume                            | 7921.6(5) Å <sup>3</sup>                                                                               |
| Density (calculated)              | 1.07 g/cm <sup>3</sup>                                                                                 |
| Absorption coefficient            | 0.47 mm <sup>-1</sup>                                                                                  |
| Crystal shape                     | plate                                                                                                  |
| Crystal size                      | 0.089 x 0.066 x 0.019 mm <sup>3</sup>                                                                  |
| Crystal colour                    | colourless                                                                                             |
| Theta range for data collection   | 3.0 to 52.6 deg.                                                                                       |
| Index ranges                      | -28 ≤ h ≤ 30, -22 ≤ k ≤ 11, -12 ≤ l ≤ 9                                                                |
| Reflections collected             | 19298                                                                                                  |
| Independent reflections           | 4513 (R(int) = 0.0720)                                                                                 |
| Observed reflections              | 2610 (I > 2σ(I))                                                                                       |
| Absorption correction             | Semi-empirical from equivalents                                                                        |
| Max. and min. transmission        | 1.39 and 0.79                                                                                          |
| Refinement method                 | Full-matrix least-squares on F <sup>2</sup>                                                            |
| Data/restraints/parameters        | 4513 / 79 / 493                                                                                        |
| Goodness-of-fit on F <sup>2</sup> | 1.06                                                                                                   |
| Final R indices (I > 2σ(I))       | R1 = 0.061, wR2 = 0.126                                                                                |
| Largest diff. peak and hole       | 0.14 and -0.15 eÅ <sup>-3</sup>                                                                        |

---

## Crystal structure of compound 4

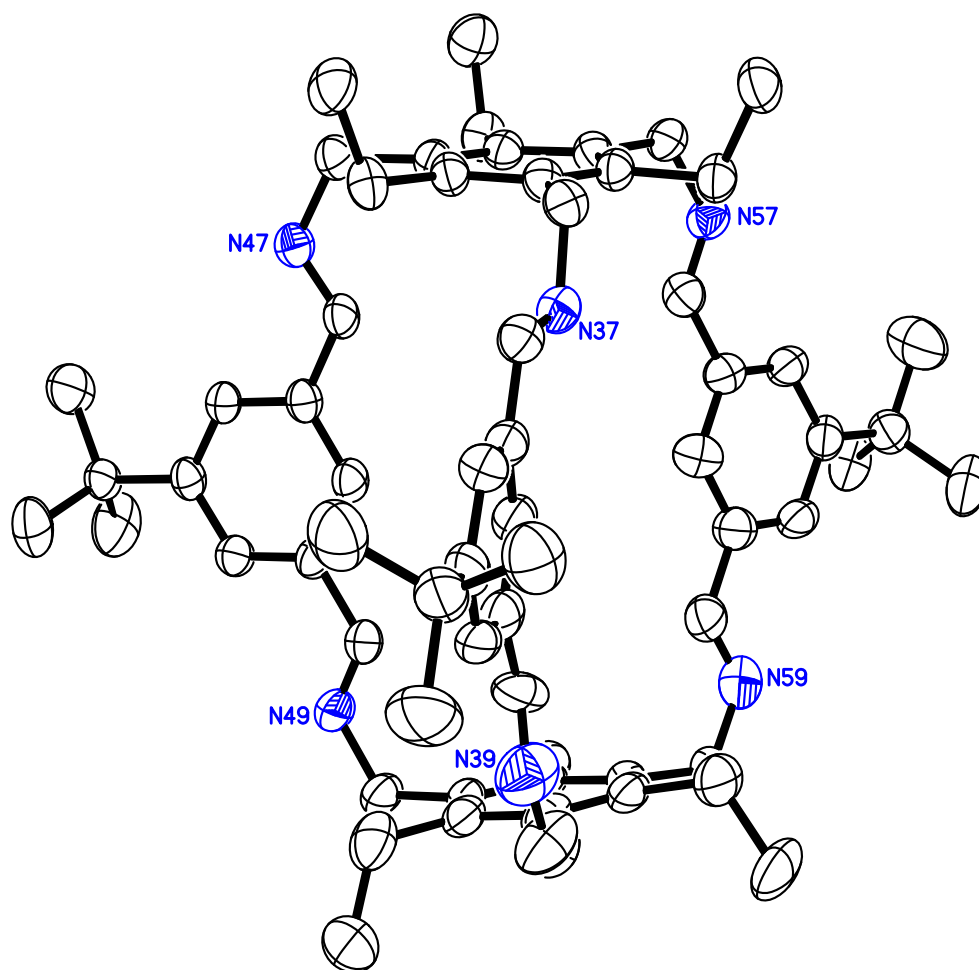

**Figure S44** Crystal structure of compound 4. Atoms of carbon are depicted in white and nitrogen in blue. Ellipsoid contour plots at a 50% probability level.

Crystals were obtained by diffusion of methanol into a chloroform solution of cage **4**.

CCDC-number : 2016637

**Table S3:** Crystal data and structure refinement for **4**.

---

|                                   |                                                                                                                                        |
|-----------------------------------|----------------------------------------------------------------------------------------------------------------------------------------|
| Empirical formula                 | C <sub>66</sub> H <sub>84</sub> N <sub>6</sub>                                                                                         |
| Formula weight                    | 961.39                                                                                                                                 |
| Temperature                       | 200(2) K                                                                                                                               |
| Wavelength                        | 1.54178 Å                                                                                                                              |
| Crystal system                    | triclinic                                                                                                                              |
| Space group                       | P $\bar{1}$                                                                                                                            |
| Z                                 | 2                                                                                                                                      |
| Unit cell dimensions              | a = 13.1663(8) Å $\alpha$ = 71.914(4) deg.<br>b = 14.0425(8) Å $\beta$ = 88.948(5) deg.<br>c = 18.3518(10) Å $\gamma$ = 85.804(5) deg. |
| Volume                            | 3216.7(3) Å <sup>3</sup>                                                                                                               |
| Density (calculated)              | 0.99 g/cm <sup>3</sup>                                                                                                                 |
| Absorption coefficient            | 0.44 mm <sup>-1</sup>                                                                                                                  |
| Crystal shape                     | brick                                                                                                                                  |
| Crystal size                      | 0.106 x 0.105 x 0.068 mm <sup>3</sup>                                                                                                  |
| Crystal colour                    | colourless                                                                                                                             |
| Theta range for data collection   | 2.5 to 67.2 deg.                                                                                                                       |
| Index ranges                      | -14 ≤ h ≤ 15, -16 ≤ k ≤ 16, -21 ≤ l ≤ 12                                                                                               |
| Reflections collected             | 29468                                                                                                                                  |
| Independent reflections           | 11058 (R(int) = 0.0539)                                                                                                                |
| Observed reflections              | 6567 (I > 2σ(I))                                                                                                                       |
| Absorption correction             | Semi-empirical from equivalents                                                                                                        |
| Max. and min. transmission        | 1.82 and 0.65                                                                                                                          |
| Refinement method                 | Full-matrix least-squares on F <sup>2</sup>                                                                                            |
| Data/restraints/parameters        | 11058 / 0 / 664                                                                                                                        |
| Goodness-of-fit on F <sup>2</sup> | 1.04                                                                                                                                   |
| Final R indices (I > 2σ(I))       | R1 = 0.075, wR2 = 0.191                                                                                                                |
| Largest diff. peak and hole       | 0.62 and -0.31 eÅ <sup>-3</sup>                                                                                                        |

---

## Crystal structure of compound 5

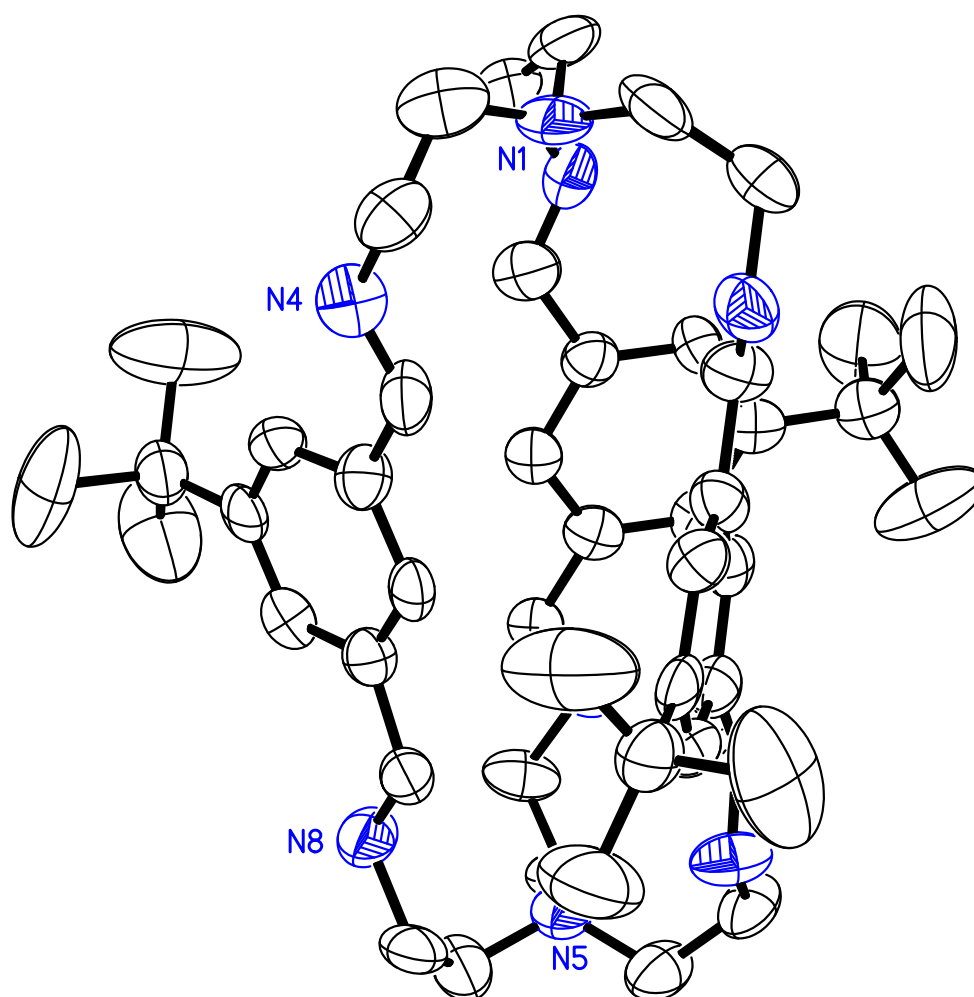

**Figure S45** Crystal structure of compound 5. Atoms of carbon are depicted in white and nitrogen in blue. Ellipsoid contour plots at a 50% probability level.

Crystals were obtained by slow evaporation of chloroform.

CCDC-number : 2016235

**Table S4:** Crystal data and structure refinement for **5**.

---

|                                      |                                                                                                                        |
|--------------------------------------|------------------------------------------------------------------------------------------------------------------------|
| Empirical formula                    | $C_{48}H_{66}N_8$                                                                                                      |
| Formula weight                       | 755.08                                                                                                                 |
| Temperature                          | 200(2) K                                                                                                               |
| Wavelength                           | 1.54178 Å                                                                                                              |
| Crystal system                       | trigonal                                                                                                               |
| Space group                          | $P_{\bar{3}1}$                                                                                                         |
| Z                                    | 4                                                                                                                      |
| Unit cell dimensions                 | $a = 11.9345(3)$ Å $\alpha = 90$ deg.<br>$b = 11.9345(3)$ Å $\beta = 90$ deg.<br>$c = 40.593(2)$ Å $\gamma = 120$ deg. |
| Volume                               | $5007.2(4)$ Å <sup>3</sup>                                                                                             |
| Density (calculated)                 | 1.00 g/cm <sup>3</sup>                                                                                                 |
| Absorption coefficient               | 0.46 mm <sup>-1</sup>                                                                                                  |
| Crystal shape                        | plank                                                                                                                  |
| Crystal size                         | 0.142 x 0.082 x 0.055 mm <sup>3</sup>                                                                                  |
| Crystal colour                       | colourless                                                                                                             |
| Theta range for data collection      | 2.2 to 63.7 deg.                                                                                                       |
| Index ranges                         | $-12 \leq h \leq 13$ , $-13 \leq k \leq 13$ , $-47 \leq l \leq 28$                                                     |
| Reflections collected                | 30462                                                                                                                  |
| Independent reflections              | 4294 ( $R(\text{int}) = 0.0803$ )                                                                                      |
| Observed reflections                 | 2623 ( $I > 2\sigma(I)$ )                                                                                              |
| Absorption correction                | Semi-empirical from equivalents                                                                                        |
| Max. and min. transmission           | 1.48 and 0.73                                                                                                          |
| Refinement method                    | Full-matrix least-squares on $F^2$                                                                                     |
| Data/restraints/parameters           | 4294 / 667 / 338                                                                                                       |
| Goodness-of-fit on $F^2$             | 1.72                                                                                                                   |
| Final R indices ( $I > 2\sigma(I)$ ) | $R1 = 0.175$ , $wR2 = 0.391$                                                                                           |
| Absolute structure parameter         | 0.7(3)                                                                                                                 |
| Largest diff. peak and hole          | 1.14 and -0.69 eÅ <sup>-3</sup>                                                                                        |

---

## 6. Cage Formation Experiments

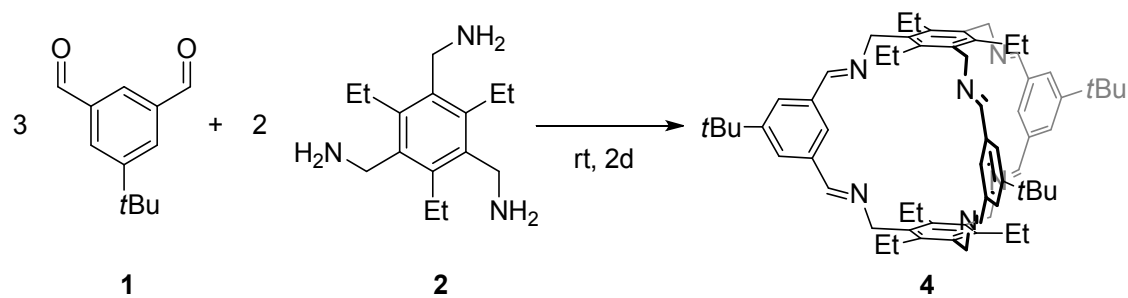

Without TFA

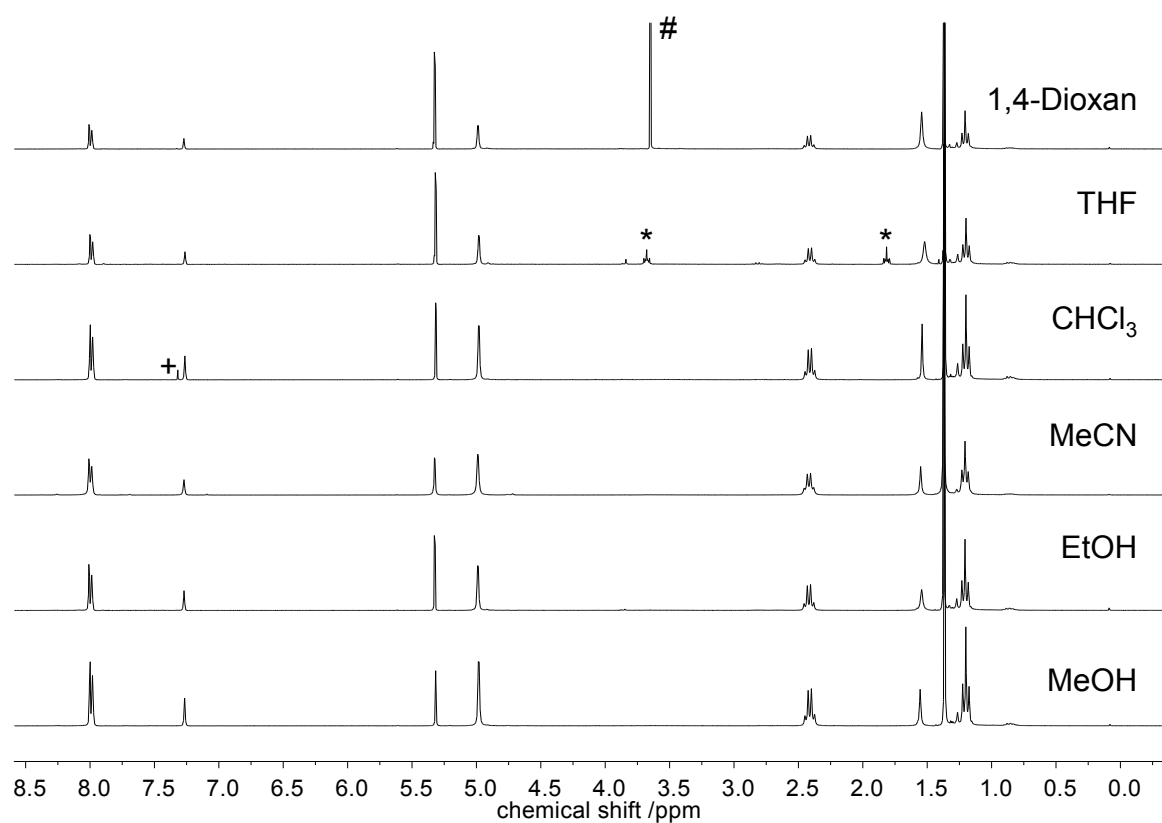

**Figure S46.** Stacked  $^1\text{H}$  NMR spectra (CD<sub>2</sub>Cl<sub>2</sub>, 300 MHz) from the isolated precipitates (reaction a, b, c, e, f, g).  $^+\text{CHCl}_3$ , #1,4-Dioxane, \*THF.

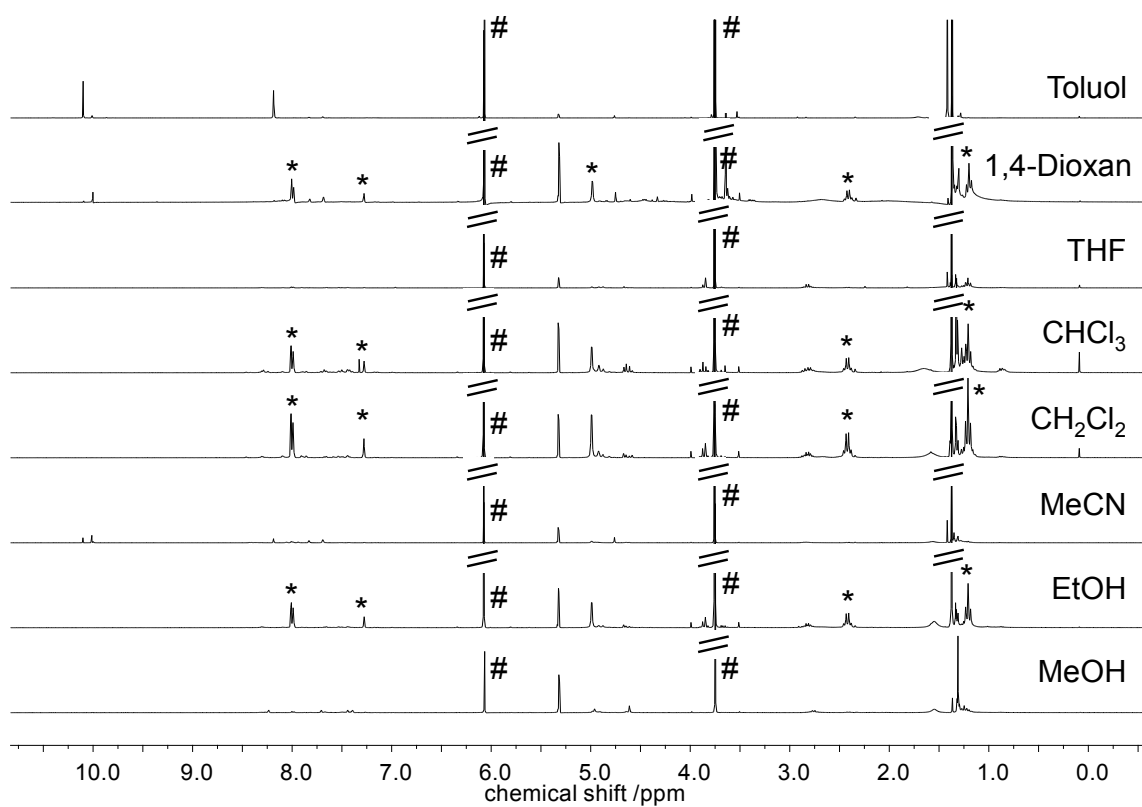

**Figure S47.** Stacked <sup>1</sup>H NMR spectra (CD<sub>2</sub>Cl<sub>2</sub>, 300 MHz) from the mother liquor (reaction a, b, c, d, e, f, g, h). \*Cage compound **4**, #1,3,5-trimethoxybenzene as standard.

With 2 mol% of TFA

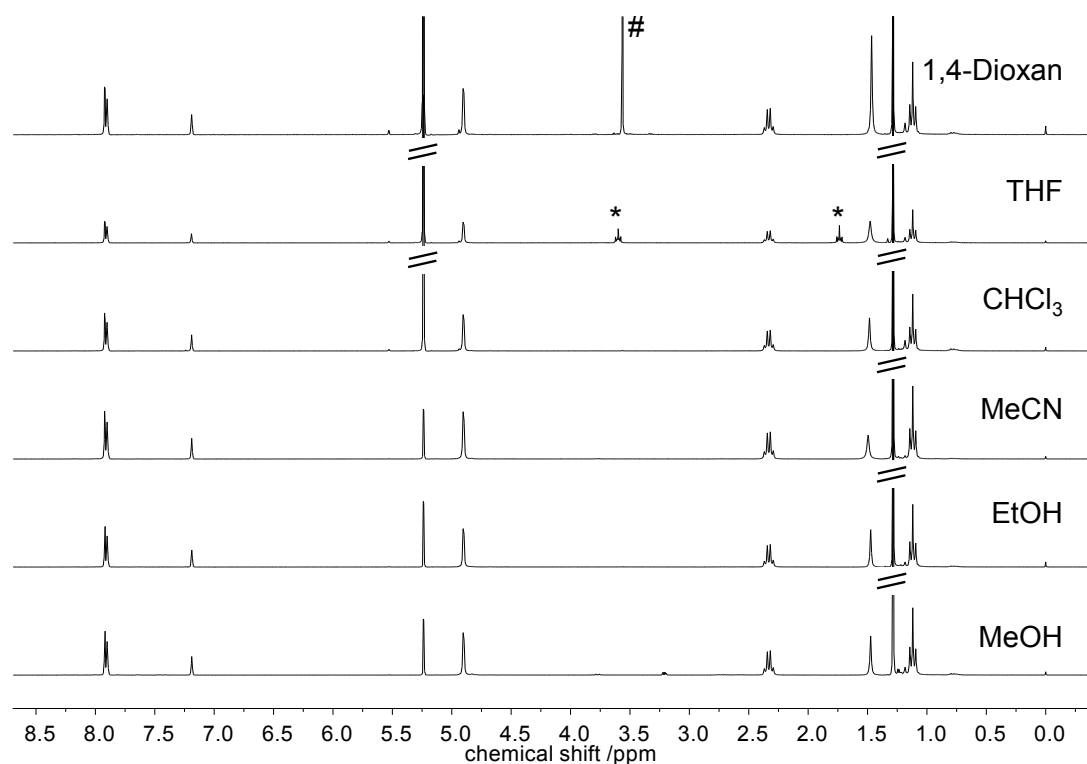

**Figure S48.** Stacked  $^1\text{H}$  NMR spectra (CD $_2$ Cl $_2$ , 300 MHz) from the isolated precipitate (reaction a, b, c, e, f, g). #1,4-Dioxane, \*THF.

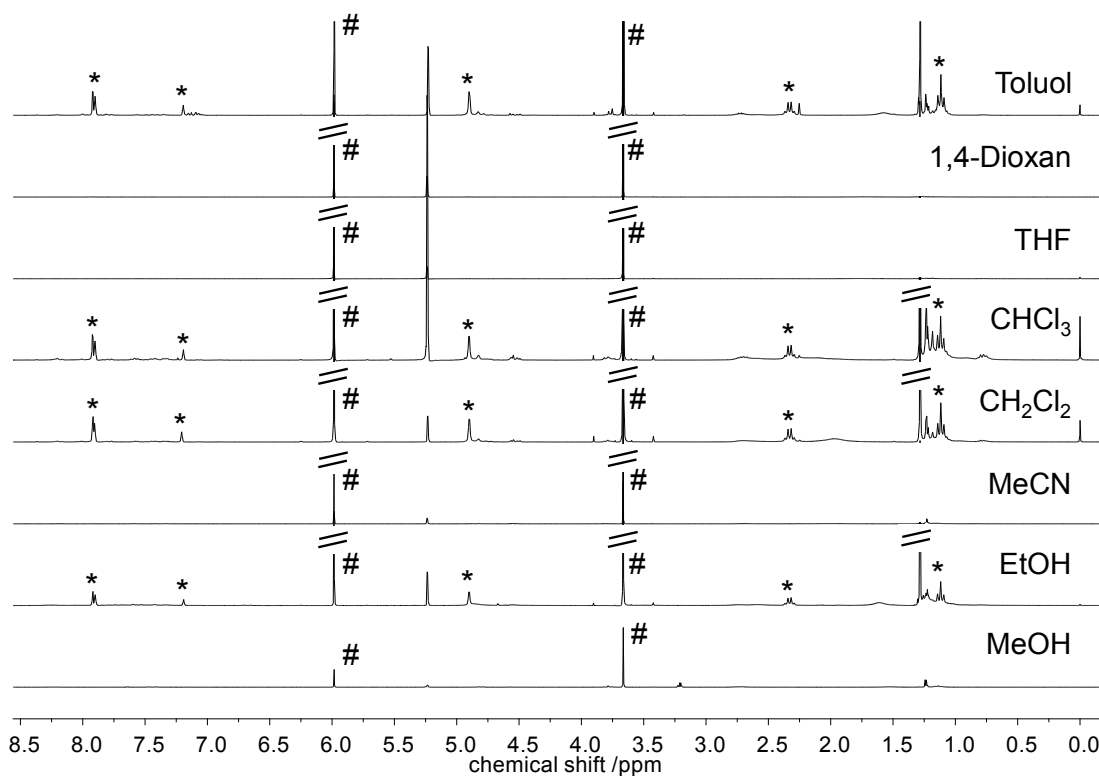

**Figure S49.** Stacked  $^1\text{H}$  NMR spectra (CD $_2$ Cl $_2$ , 300 MHz) from the isolated solid form from the mother liquor (reaction a, b, c, d, e, f, g, h). \*Cage compound 4, #1,3,5-Trimethoxybenzene as standard.



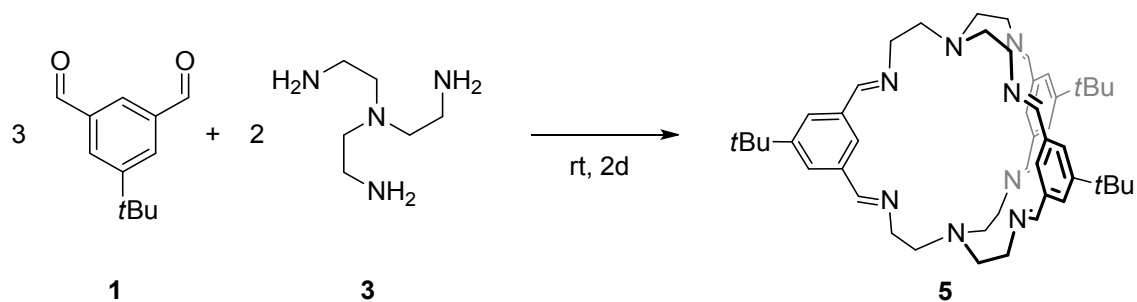

Without TFA

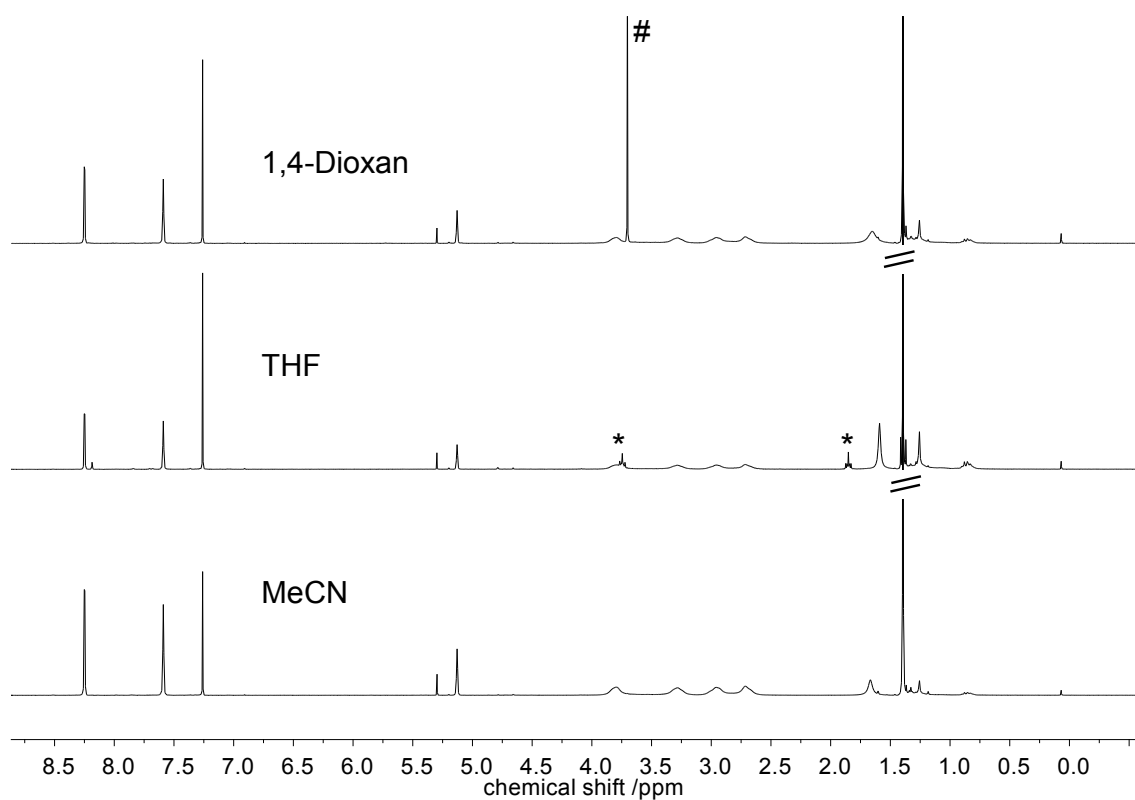

**Figure S50.** Stacked  $^1\text{H}$  NMR spectra ( $\text{CD}_2\text{Cl}_2$ , 300 MHz) from the isolated precipitates (reaction c, f, g). #1,4-Dioxane, \*THF.

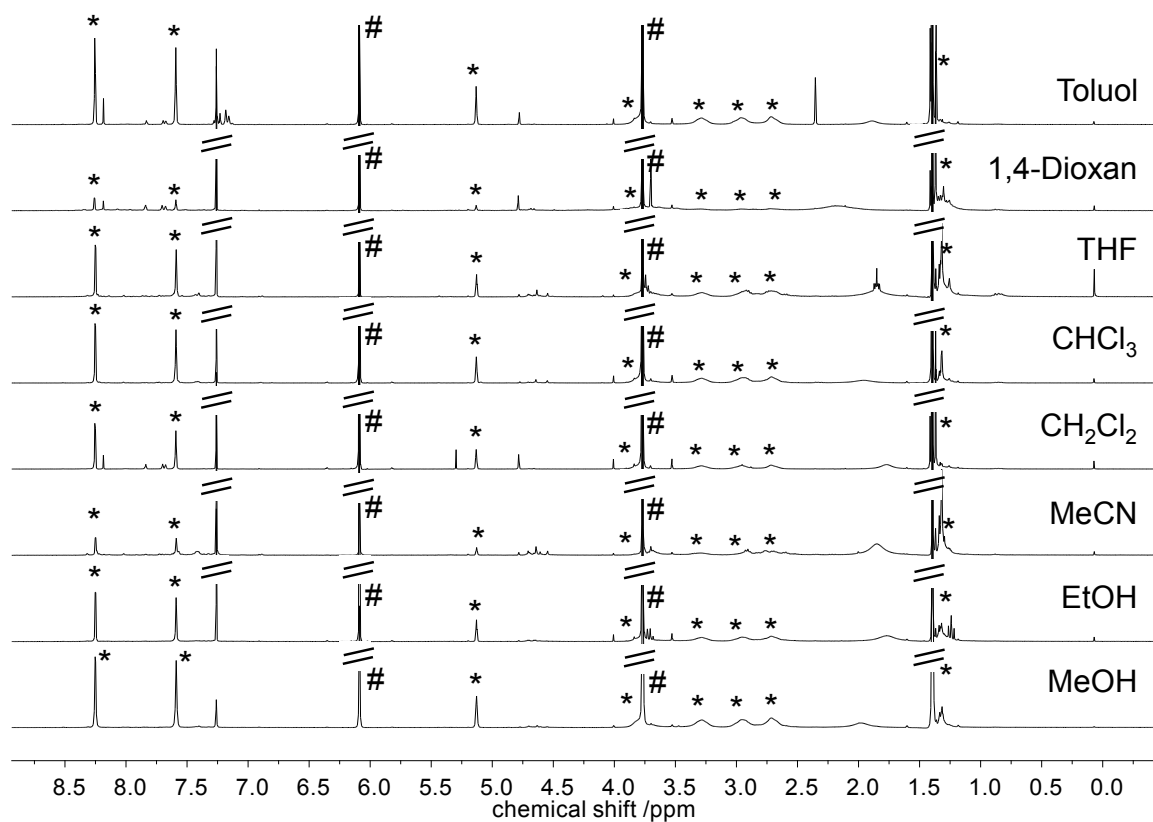

**Figure S51.** Stacked <sup>1</sup>H NMR spectra (CD<sub>2</sub>Cl<sub>2</sub>, 300 MHz) from the isolated solid form the mother liquor (reaction a, b, c, d e, f, g, h). \*Cage compound **5**, #1,3,5-Trimethoxybenzene as standard.

with 2 mol% of TFA

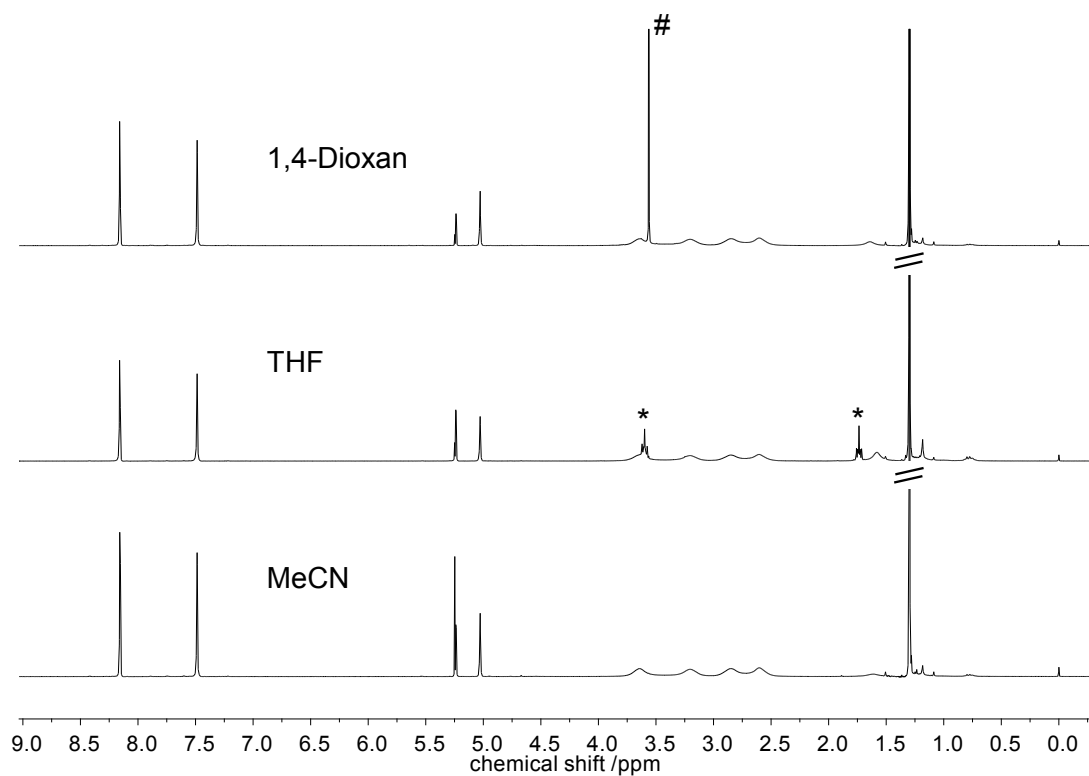

**Figure S52.** Stacked <sup>1</sup>H NMR spectra (CD<sub>2</sub>Cl<sub>2</sub>, 300 MHz) from the isolated precipitate (reaction c, f, g). #1,4-Dioxane, \*THF.

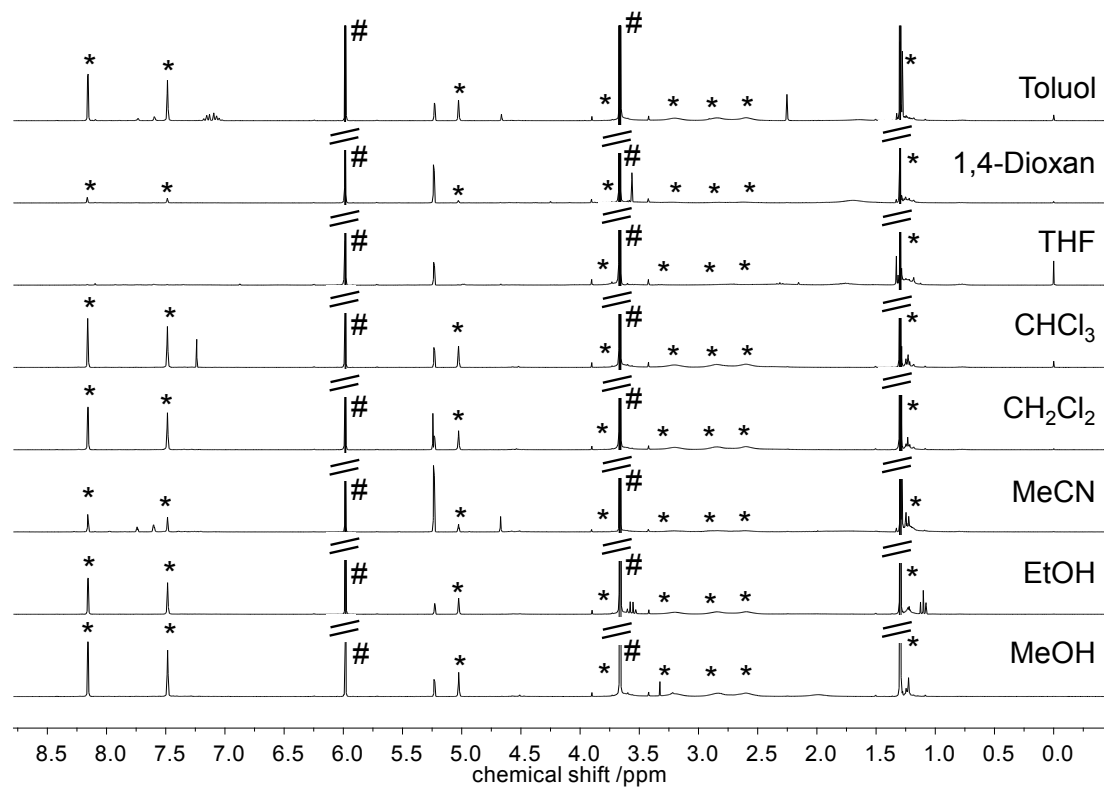

**Figure S53.** <sup>1</sup>H NMR spectra (CD<sub>2</sub>Cl<sub>2</sub>, 300 MHz) from the isolated solid form the mother liquor (reaction a, b, c, d, e, f, g, h). \*Cage compound **5**, #1,3,5-Trimethoxybenzene as standard.

## 7. Cage-to-Cage Scrambling

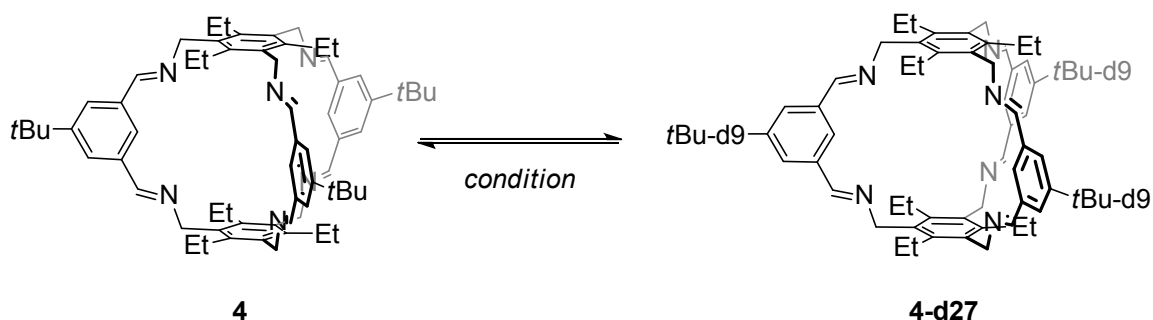

Without TFA

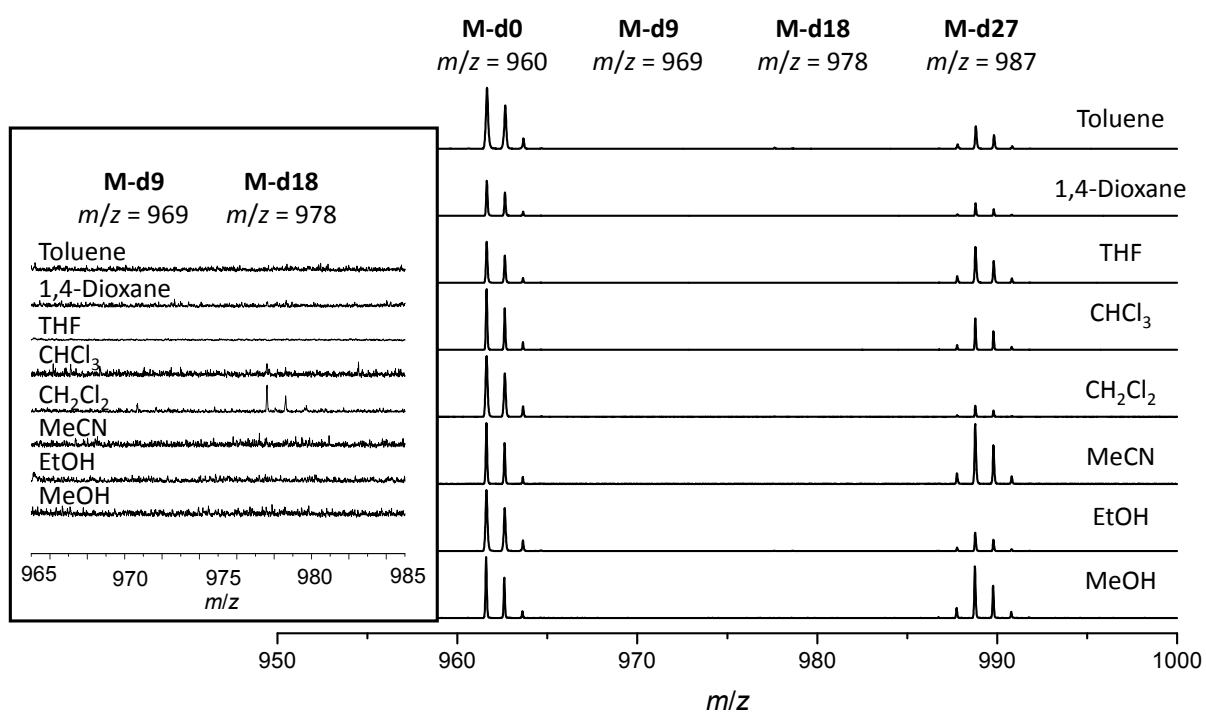

**Figure S54.** MS MALDI (TOF, DCTB) spectra of the reactions a, b, c, d, e, f, g, h taken out of the homogeneous reaction mixture after 7d before addition of water.

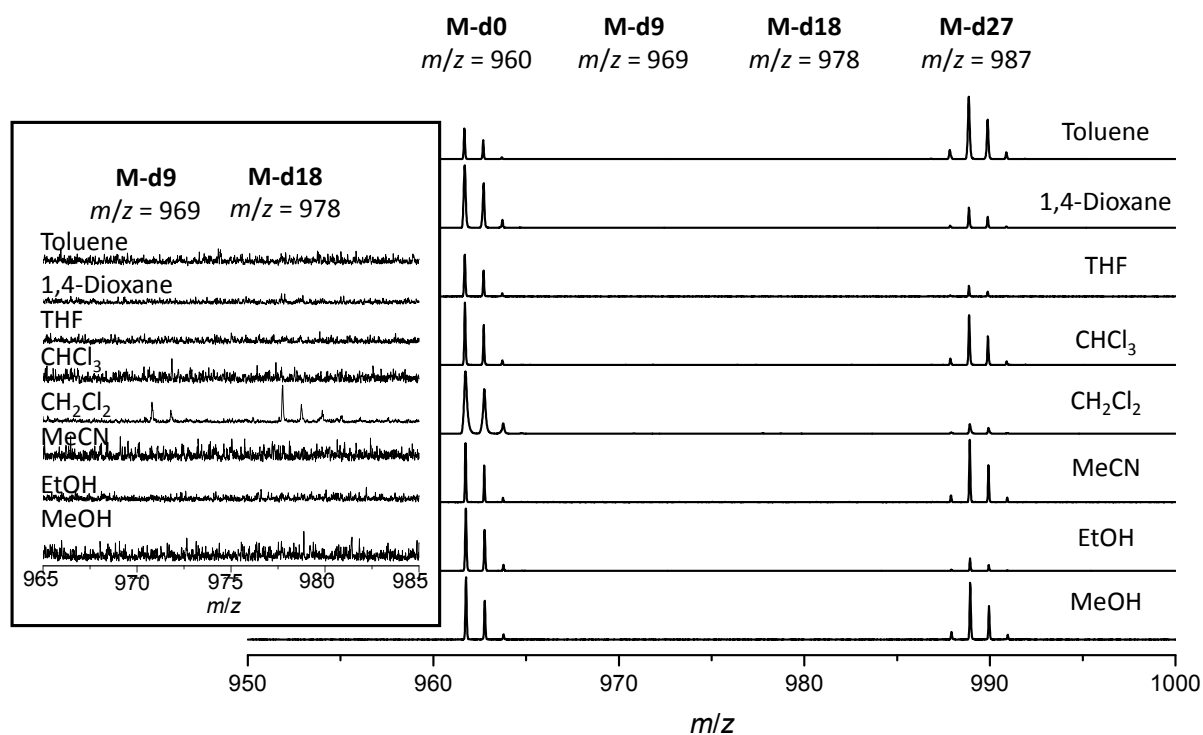

**Figure S55.** MS MALDI (TOF, DCTB) spectra of the reactions a, b, c, d, e, f, g, h taken out of the homogeneous reaction mixture after 7 days after addition of water.

### With TFA

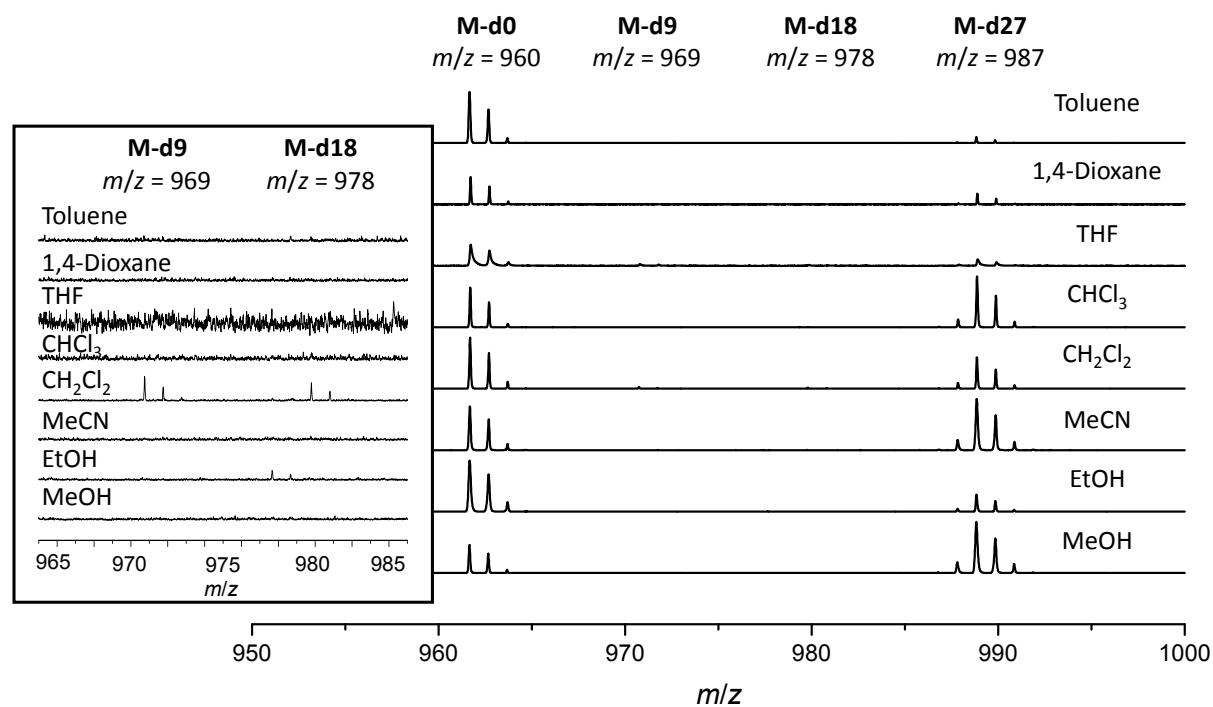

**Figure S56.** MS MALDI (TOF, DCTB) spectra of the reaction a, b, c, d, e, f, g, h taken out of the homogeneous reaction mixture after 7d.

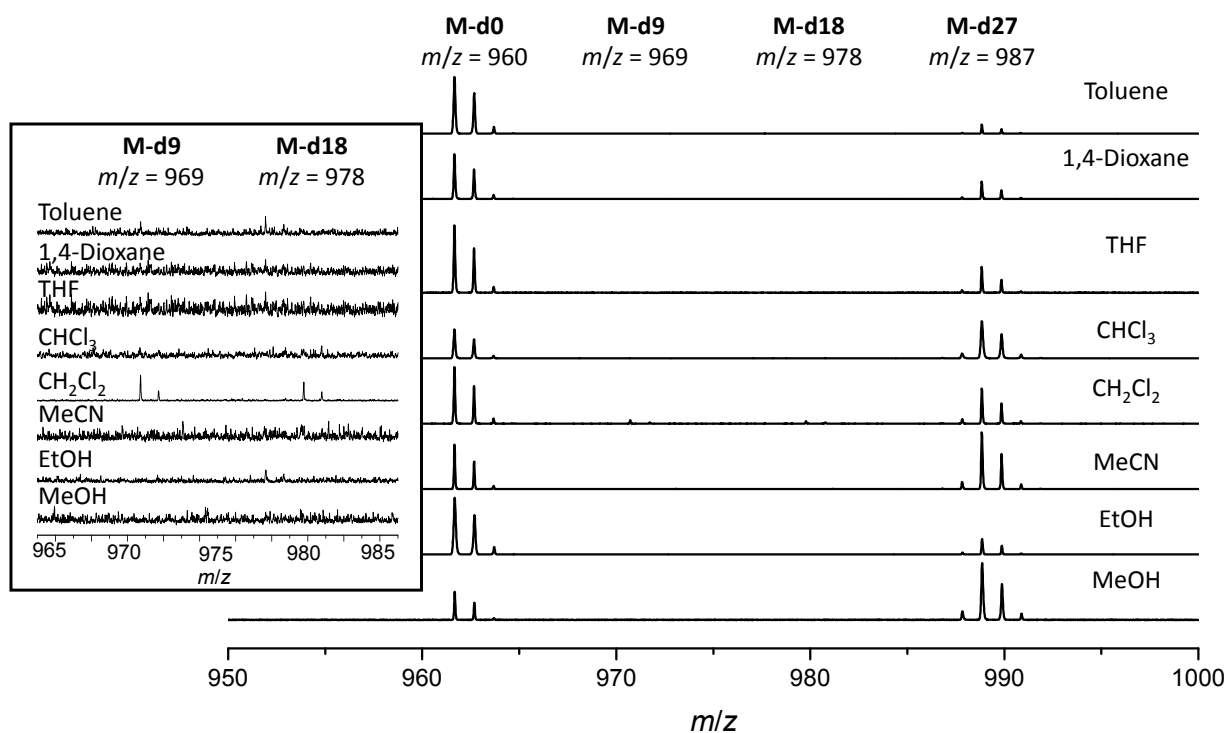

**Figure S57.** MS MALDI (TOF, DCTB) spectra of the reaction a, b, c, d, e, f, g, h taken out of the homogeneous reaction mixture after 7d.

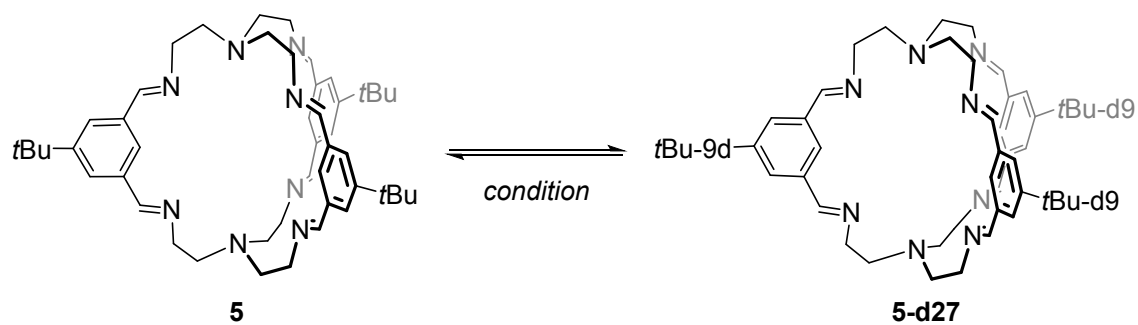

**Without TFA**

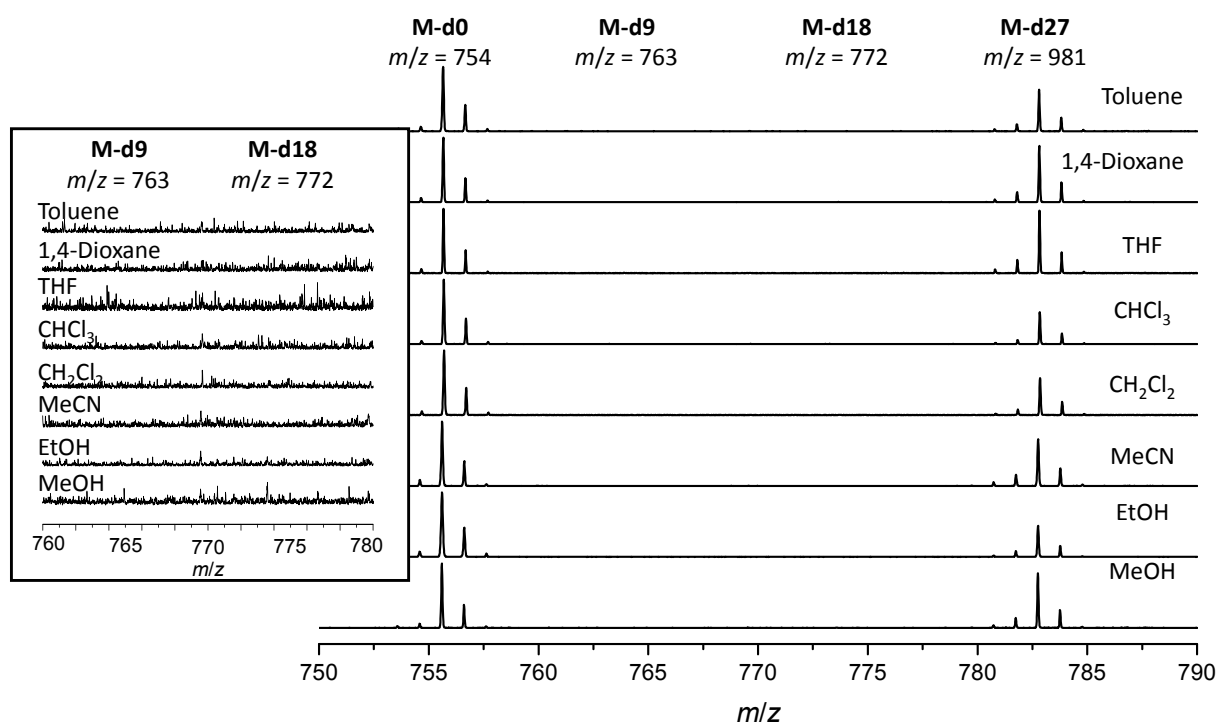

**Figure S58.** MS MALDI (TOF, DCTB) spectra of the reaction a, b, c, d, e, f, g, h taken out of the homogeneous reaction mixture after 7d.

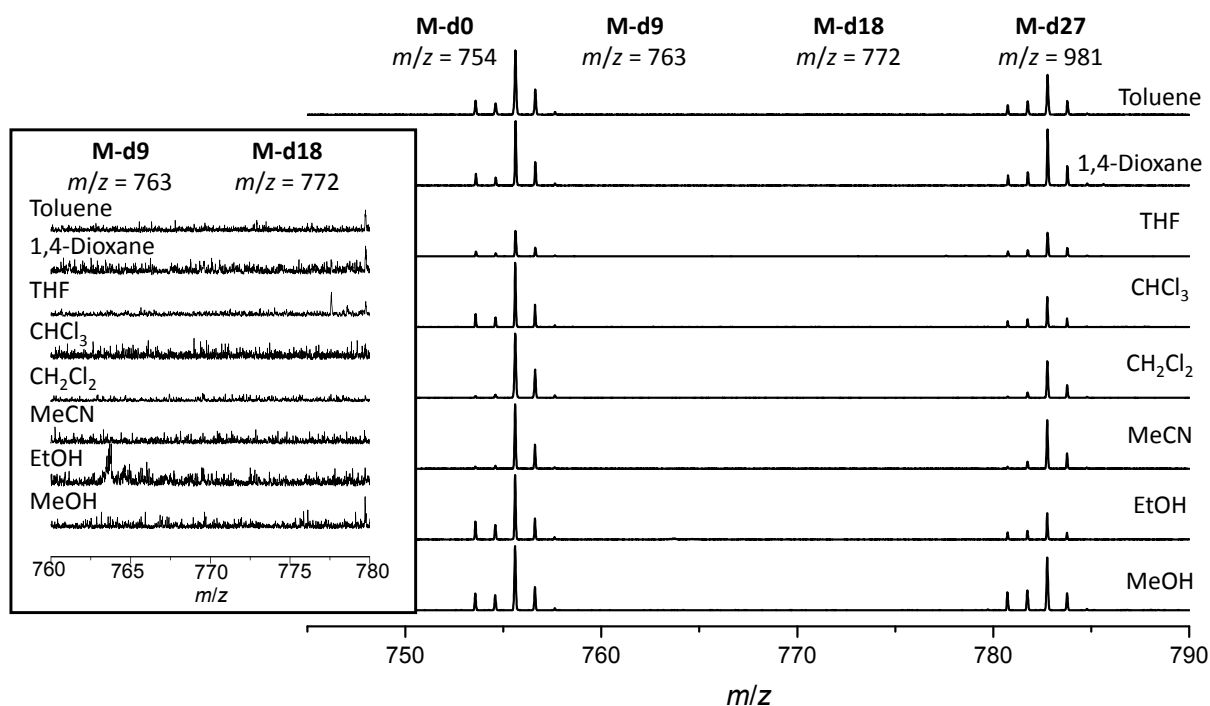

**Figure S59.** MS MALDI (TOF, DCTB) spectra of the reaction a, b, c, d, e, f, g, h taken out of the homogeneous reaction mixture after 7d.

### With TFA

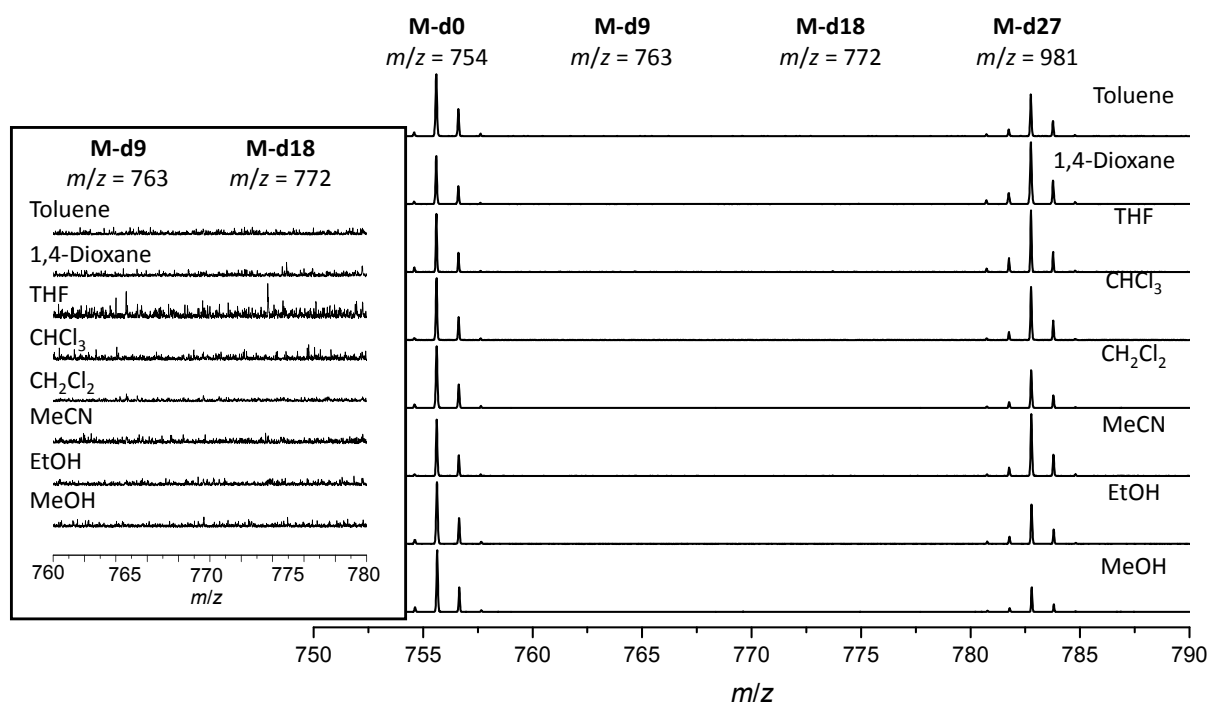

**Figure S60.** MS MALDI (TOF, DCTB) spectra of the reaction a, b, c, d, e, f, g, h taken out of the homogeneous reaction mixture after 7d.



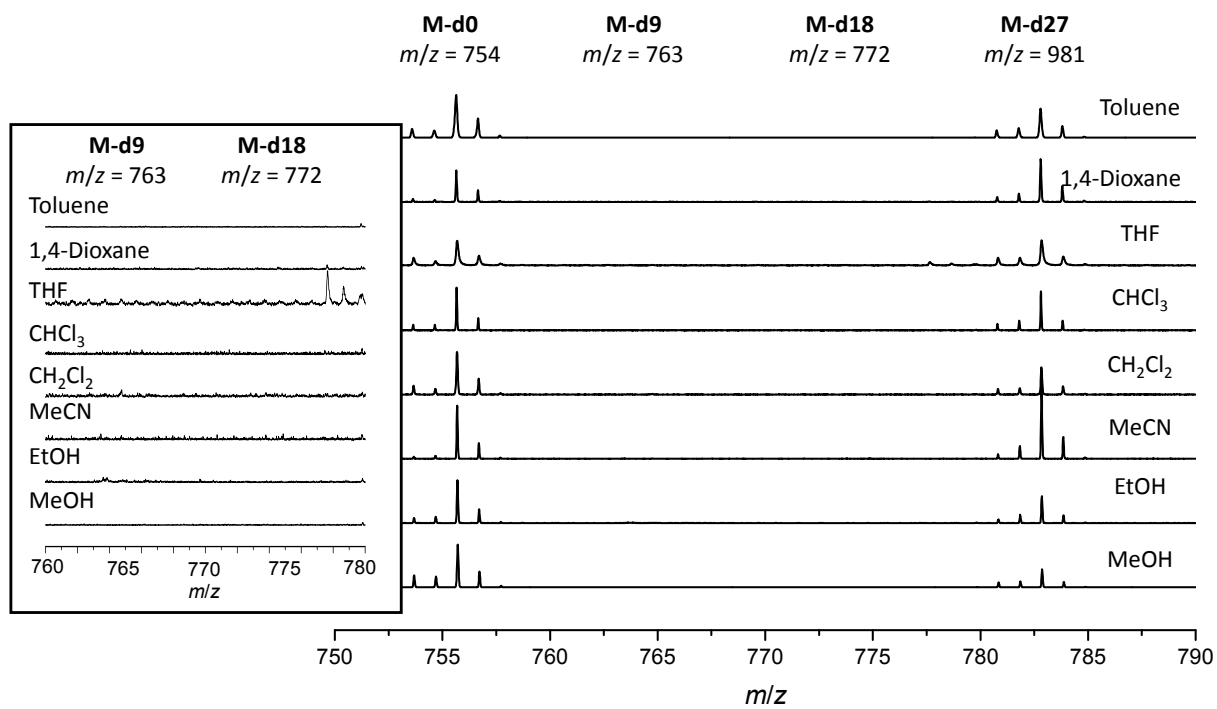

**Figure S61.** MS MALDI (TOF, DCTB) spectra of the reaction a, b, c, d, e, f, g, h taken out of the homogeneous reaction mixture after 7d.

## 8. Aldehyde Exchange

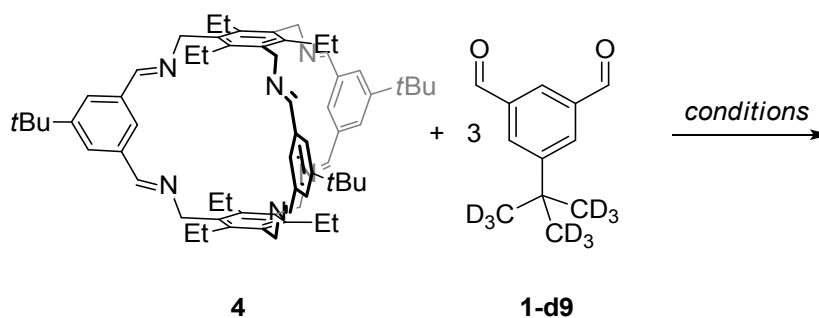

Without TFA

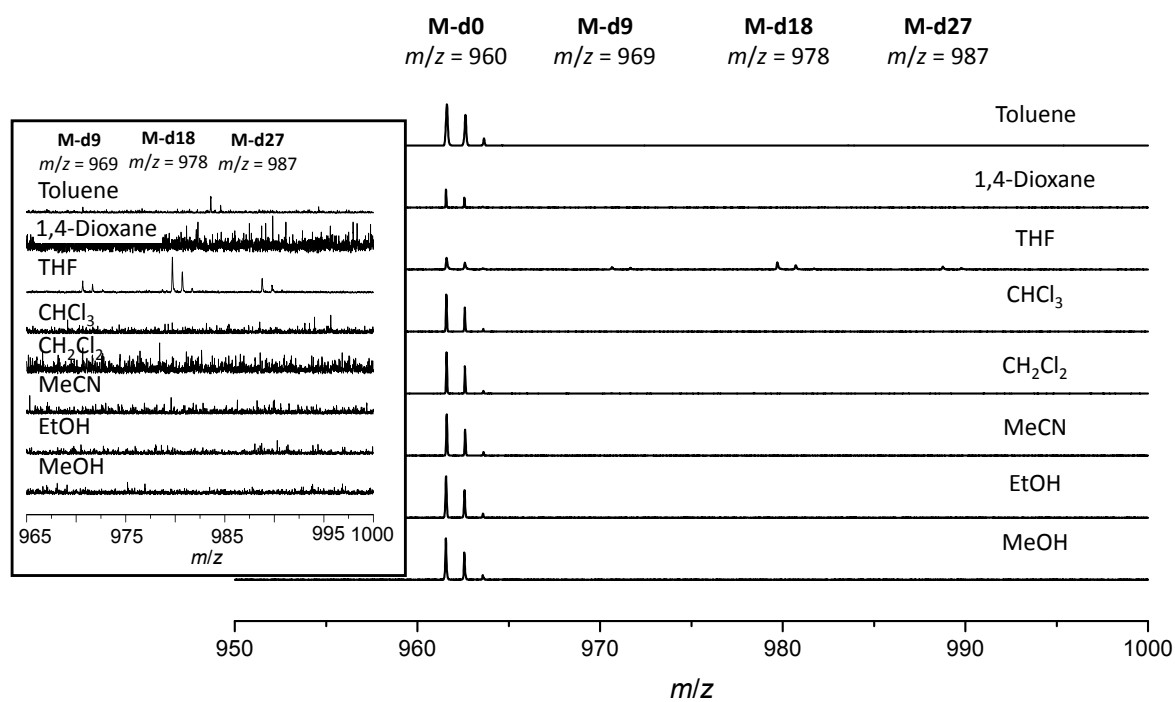

**Figure S62.** MS MALDI (TOF, DCTB) spectra of the reaction a, b, c, d, e, f, g, h taken out of the homogeneous reaction solution after 7d.

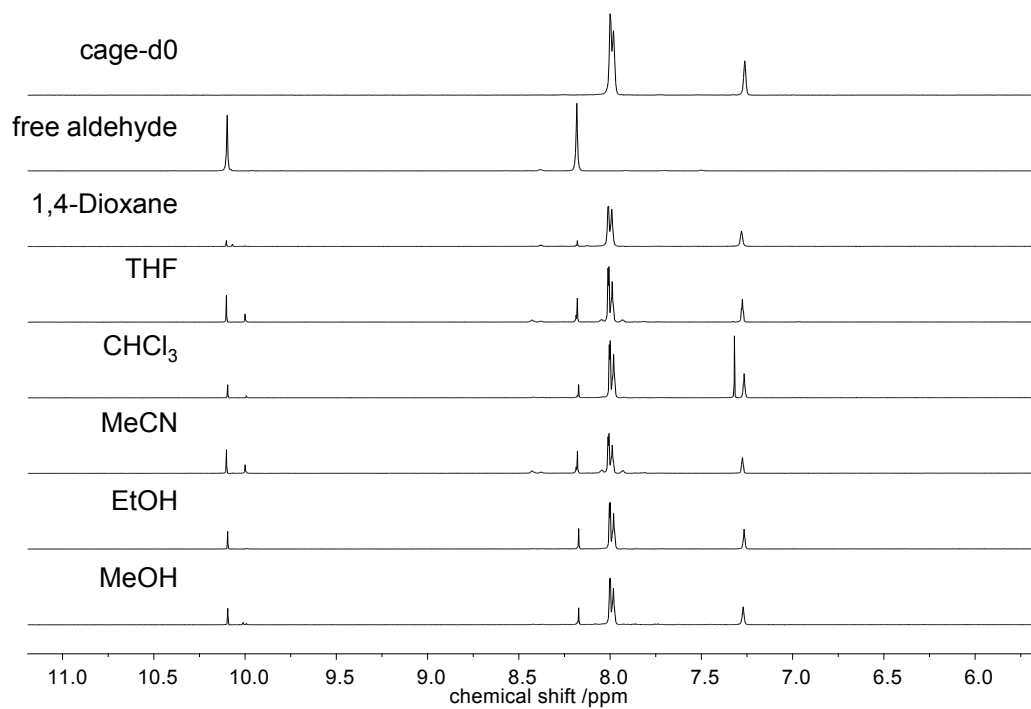

**Figure S63.** <sup>1</sup>H NMR spectra (CD<sub>2</sub>Cl<sub>2</sub>, 300 MHz; region  $\delta$ =11.0 ppm – 6.00 ppm) from the isolated precipitates (reaction a, b, c, e, f, g; reaction time: 7d).

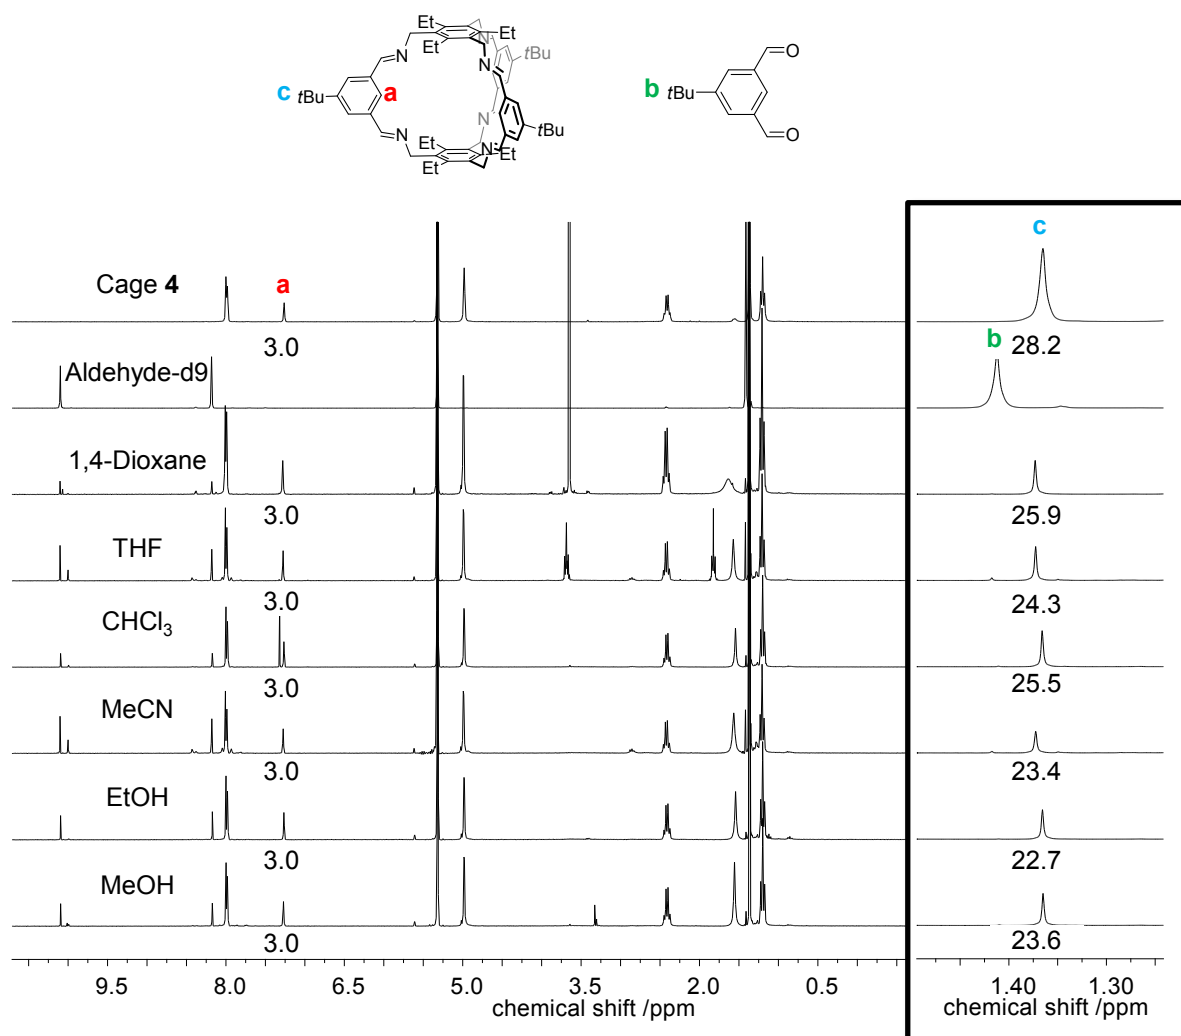

**Figure S64.**  $^1\text{H}$  NMR spectra ( $\text{CD}_2\text{Cl}_2$ , 300 MHz) from the isolated precipitates (reaction a, b, c, e, f, g; reaction time: 7d). Integrals of Signals at  $\delta = 7.27$  ppm and  $\delta = 1.37$  ppm are given.

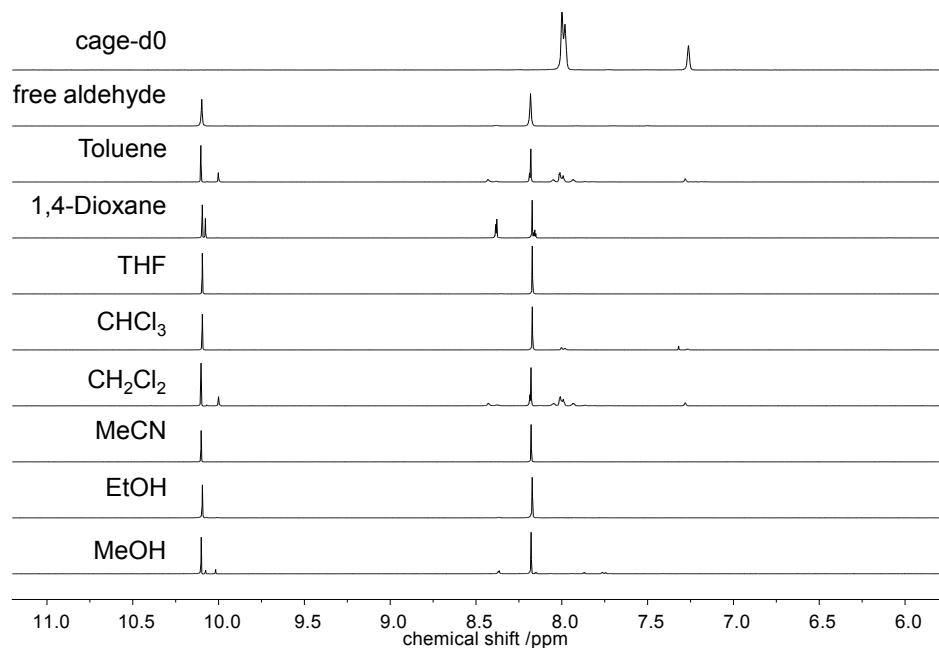

**Figure S65.**  $^1\text{H}$  NMR spectra ( $\text{CD}_2\text{Cl}_2$ , 300 MHz; region  $\delta=11.0$  ppm – 6.00 ppm) from the isolated solid from the mother liquor (reaction a, b, c, d, e, f, g, h; reaction time: 7d)..

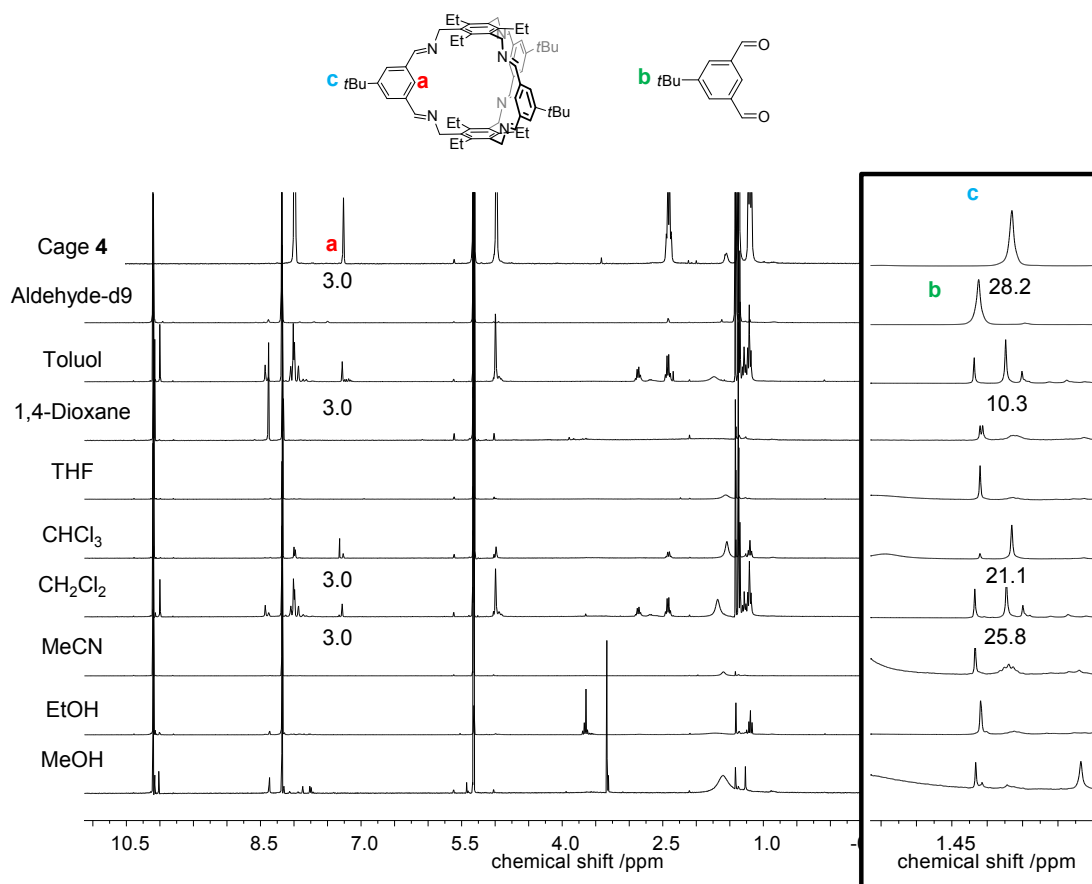

**Figure S66.**  $^1\text{H}$  NMR spectra ( $\text{CD}_2\text{Cl}_2$ , 300 MHz;) from the mother liquor (reaction a, b, c, e, f, g; reaction time: 7d). Integrals for signals at  $\delta = 7.27$  ppm and  $\delta = 1.37$  ppm are given.

With TFA

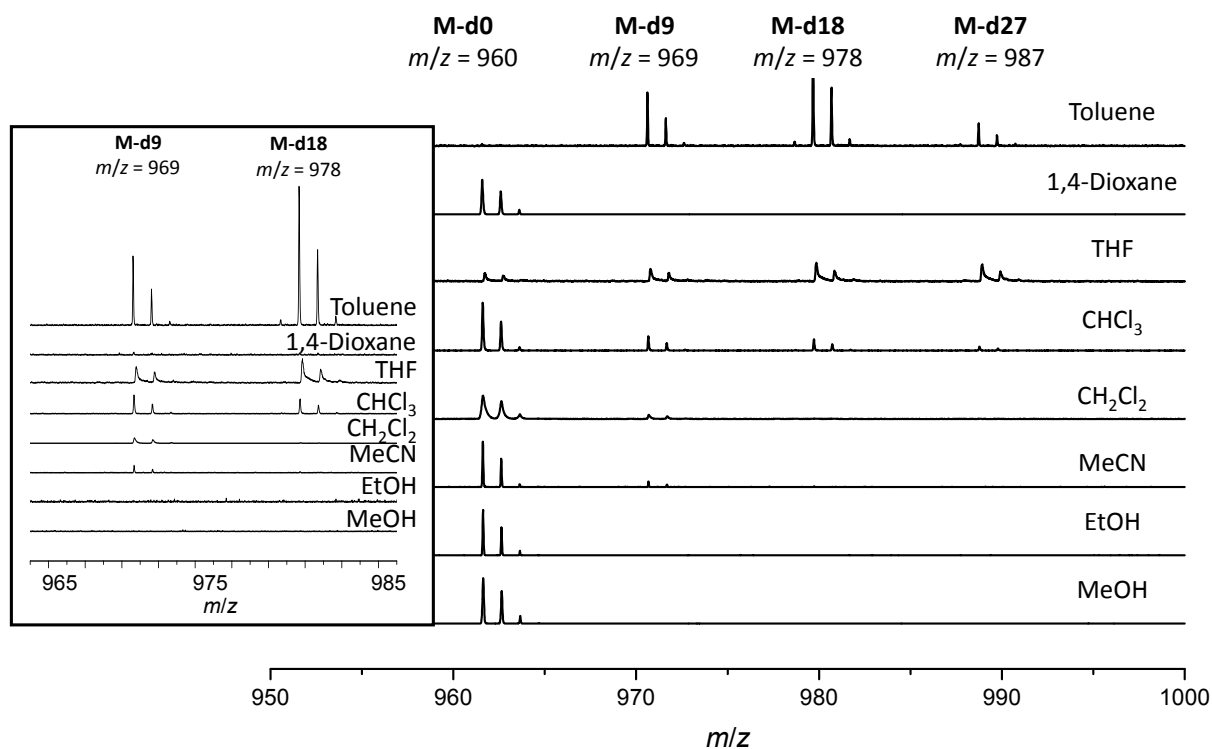

**Figure S67.** MS MALDI (TOF, DCTB) spectra of the reaction a, b, c, d, e, f, g, h taken out of the homogeneous reaction solution after 7d.

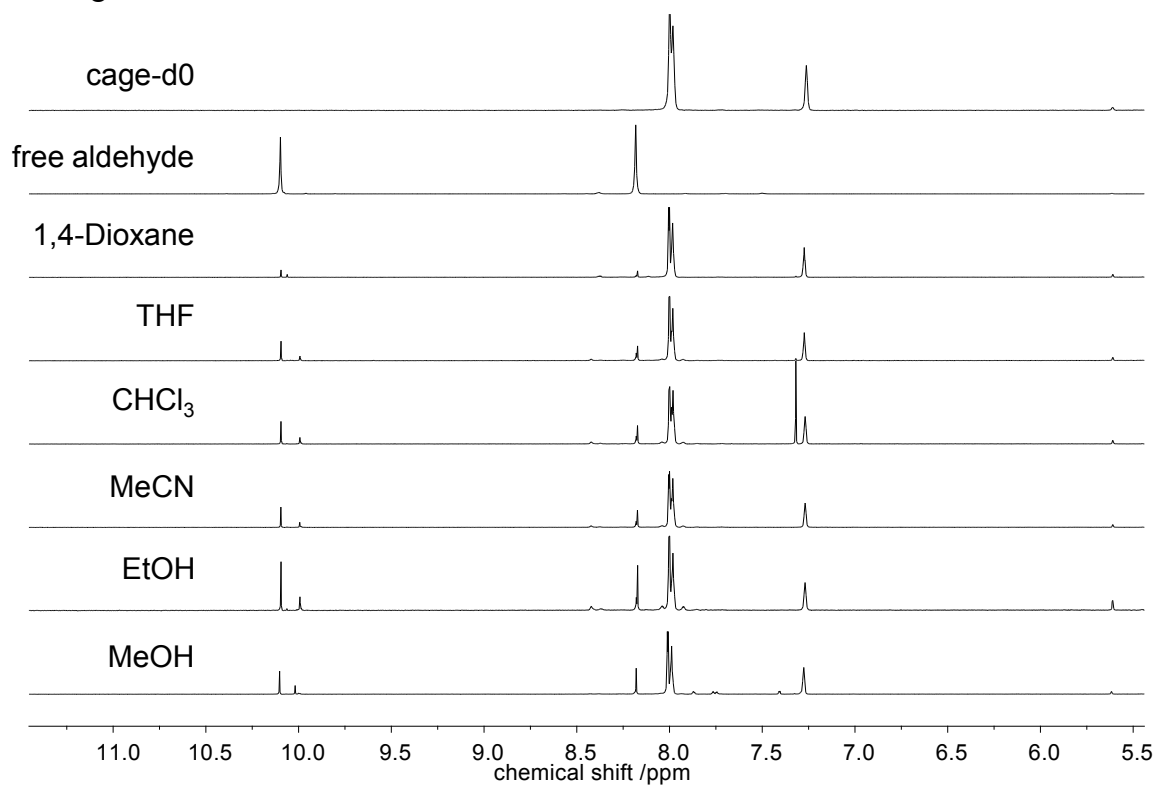

**Figure S68.**  $^1\text{H}$  NMR spectra (CD<sub>2</sub>Cl<sub>2</sub>, 300 MHz; region  $\delta = 11.0$  ppm – 6.00 ppm) from the isolated precipitate (reaction a, b, c, e, f, g; reaction time: 7d).

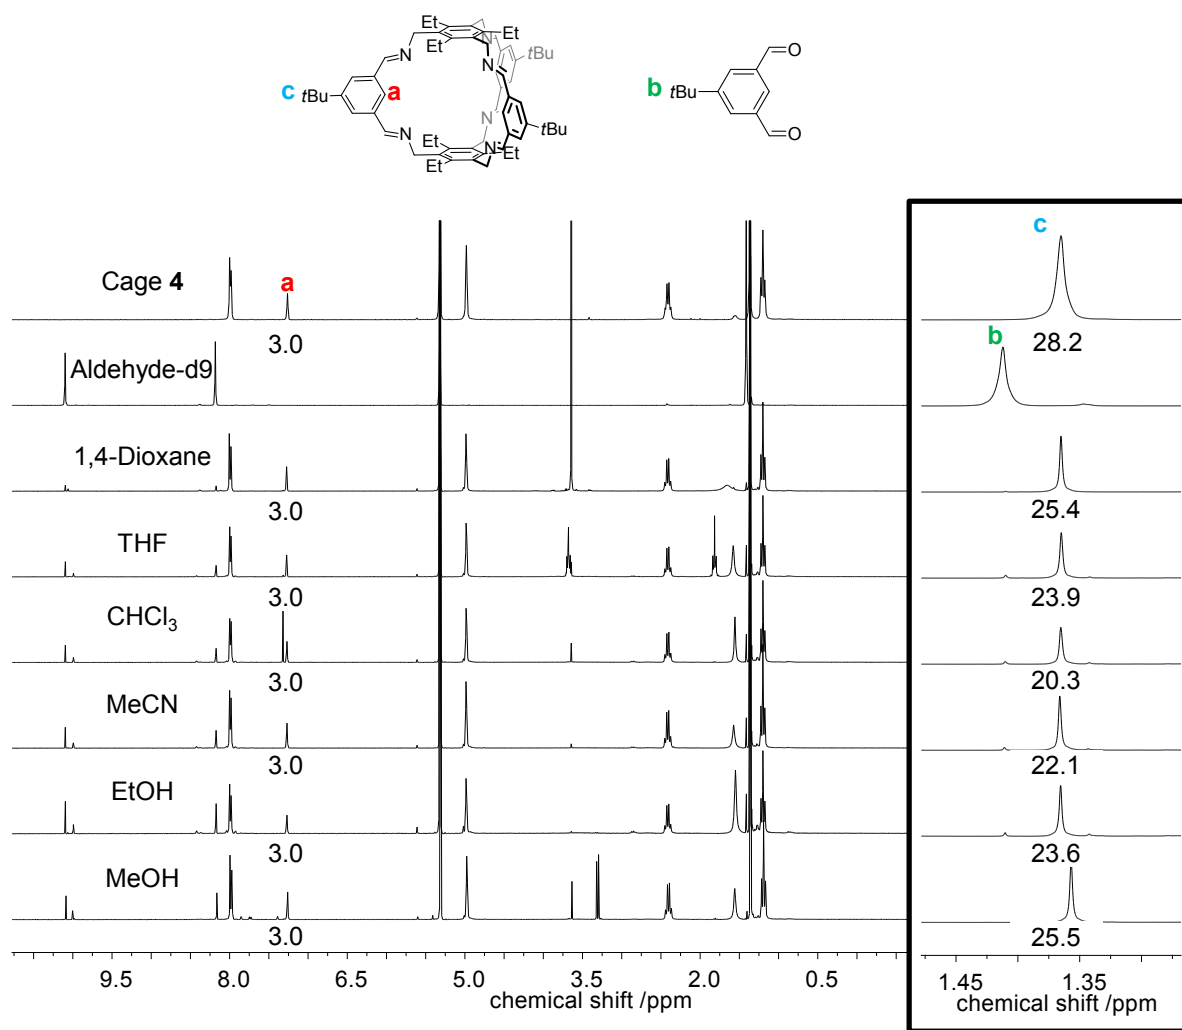

**Figure S69.**  $^1\text{H}$  NMR spectra (CD $_2$ Cl $_2$ , 300 MHz) from the isolated precipitates (reaction a, b, c, e, f, g; reaction time: 7d). Integrals of signals at  $\delta = 7.27$  ppm and  $\delta = 1.37$  ppm are given.

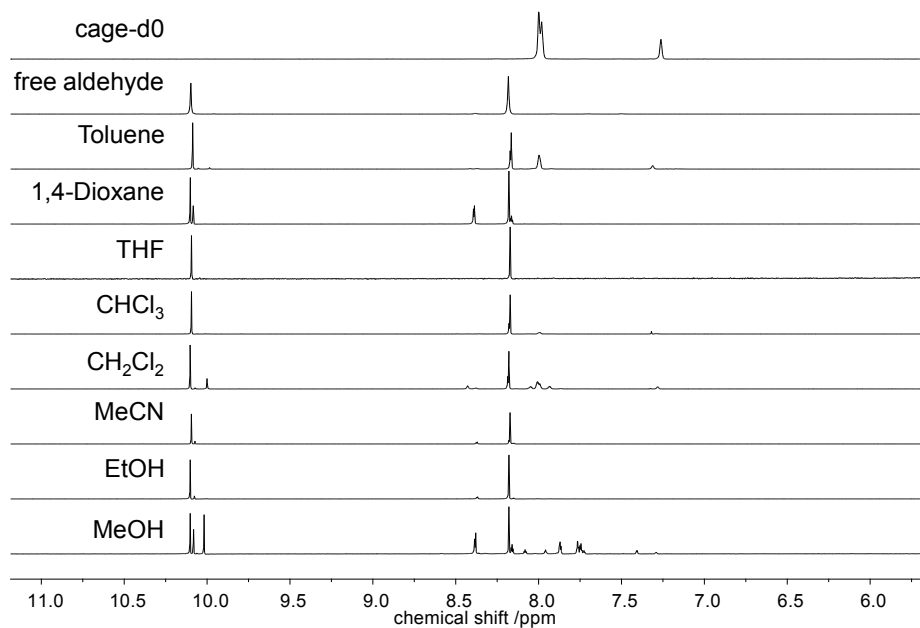

**Figure S70.**  $^1\text{H}$  NMR spectra ( $\text{CD}_2\text{Cl}_2$ , 300 MHz; region  $\delta=11.0$  ppm – 6.00 ppm) from the isolated solid from the mother liquor (reaction a, b, c, d, e, f, g, h; reaction time: 7d)..

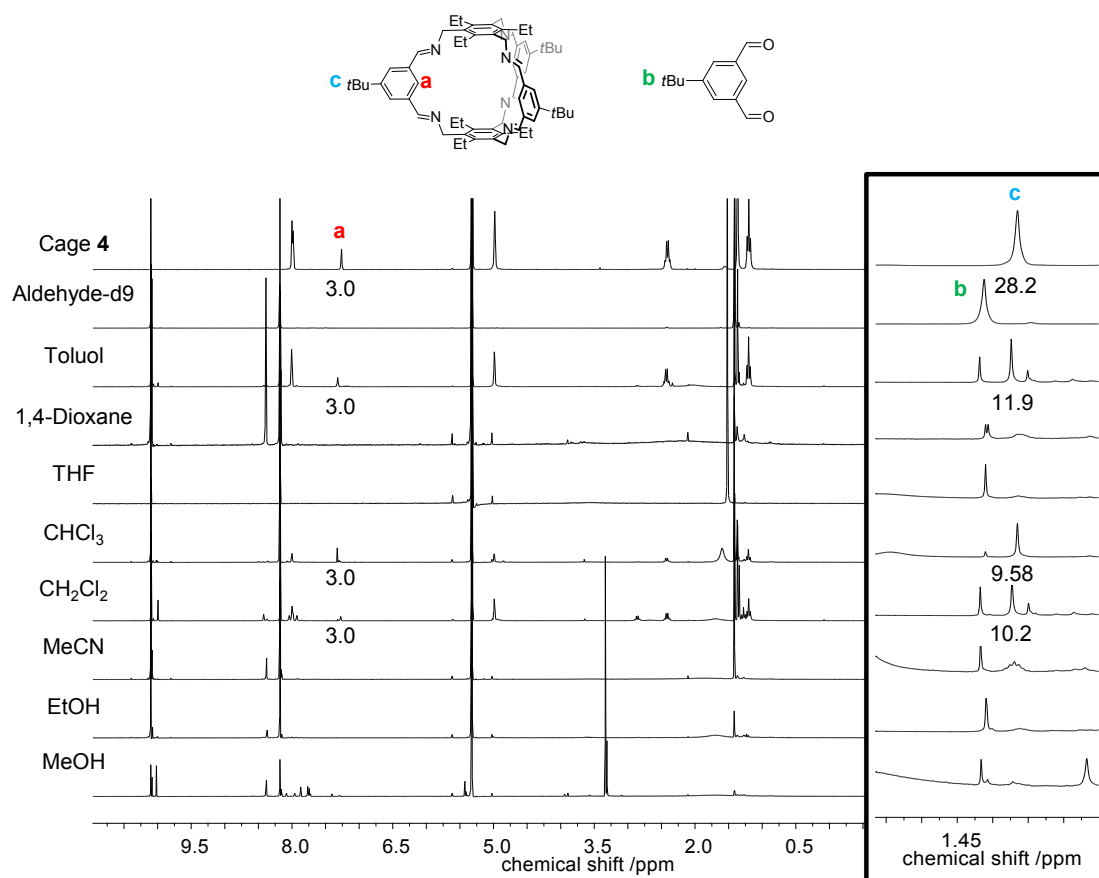

**Figure S71.**  $^1\text{H}$  NMR spectra ( $\text{CD}_2\text{Cl}_2$ , 300 MHz) from the mother liquor (reaction a, b, c, e, f, g; reaction time: 7d). Integrals for signals at  $\delta = 7.27$  ppm and  $\delta = 1.37$  ppm are given.



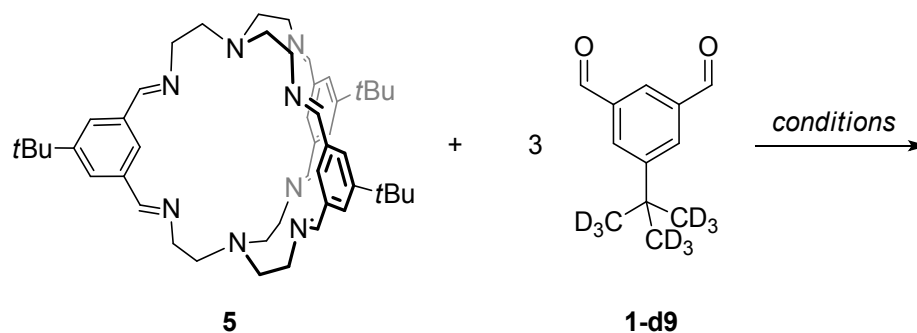

**Without TFA**

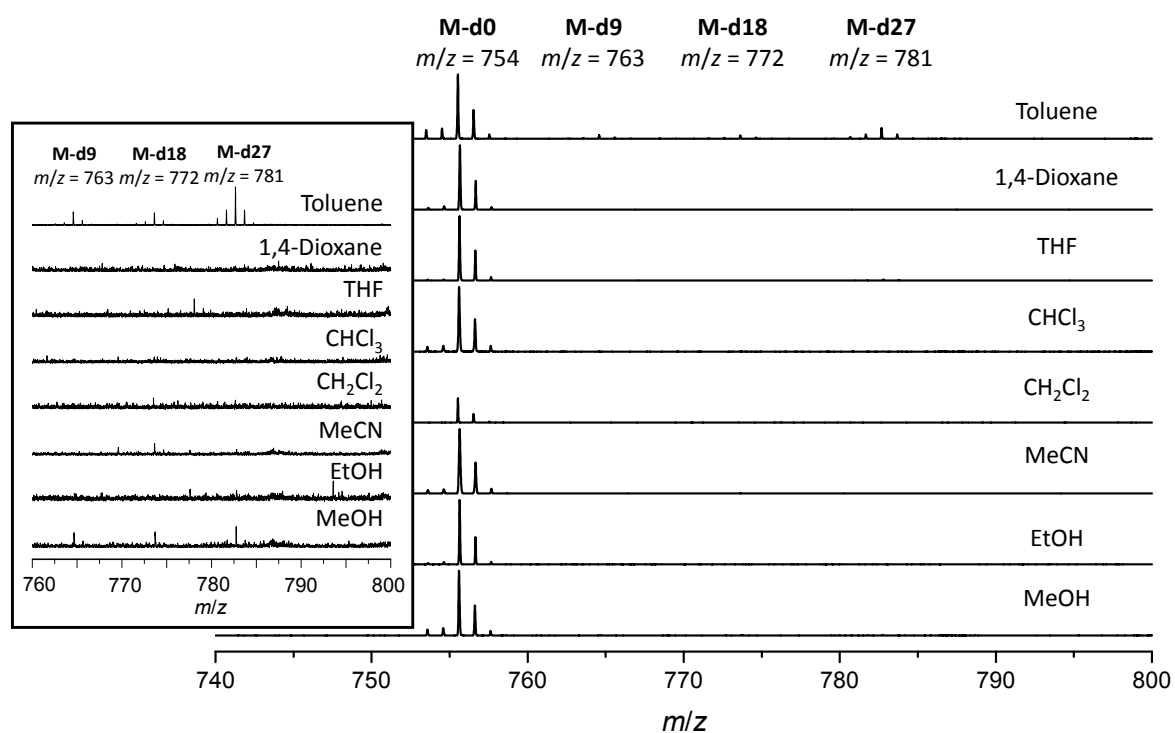

**Figure S72.** MS MALDI (TOF, DCTB) spectra of the reaction a, b, c, d, e, f, g, h taken out of the homogeneous reaction solution after 7d.

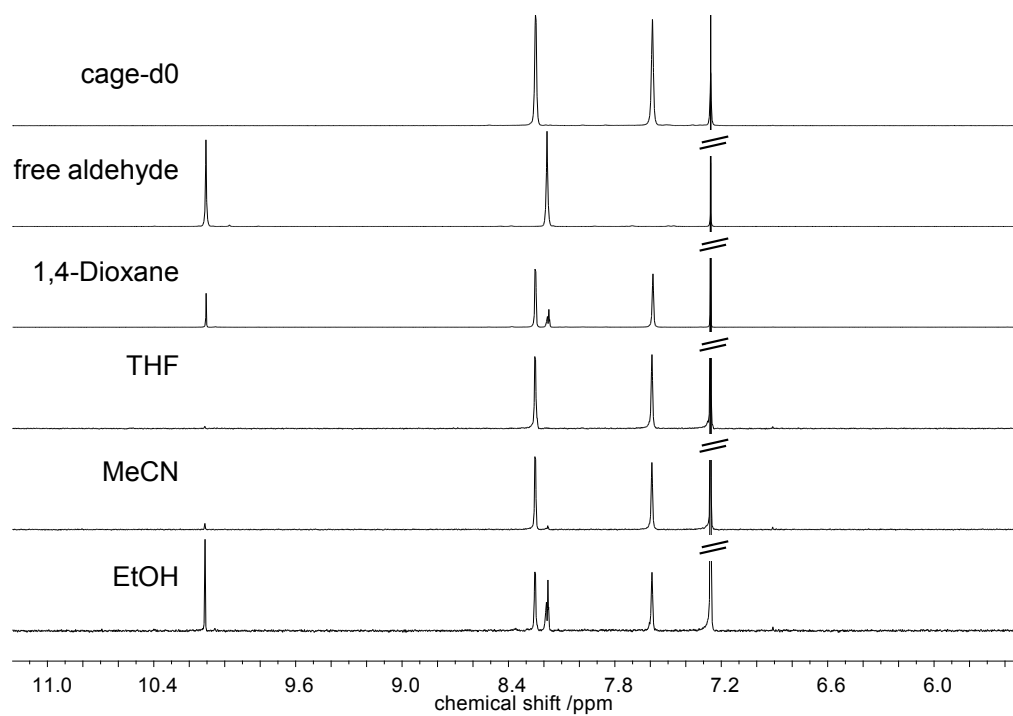

**Figure S73.** <sup>1</sup>H NMR spectra (CDCl<sub>3</sub>, 300 MHz; region  $\delta$ =11.0 ppm – 6.00 ppm) from the isolated precipitate (reaction b, c, f, g; reaction time: 7d).

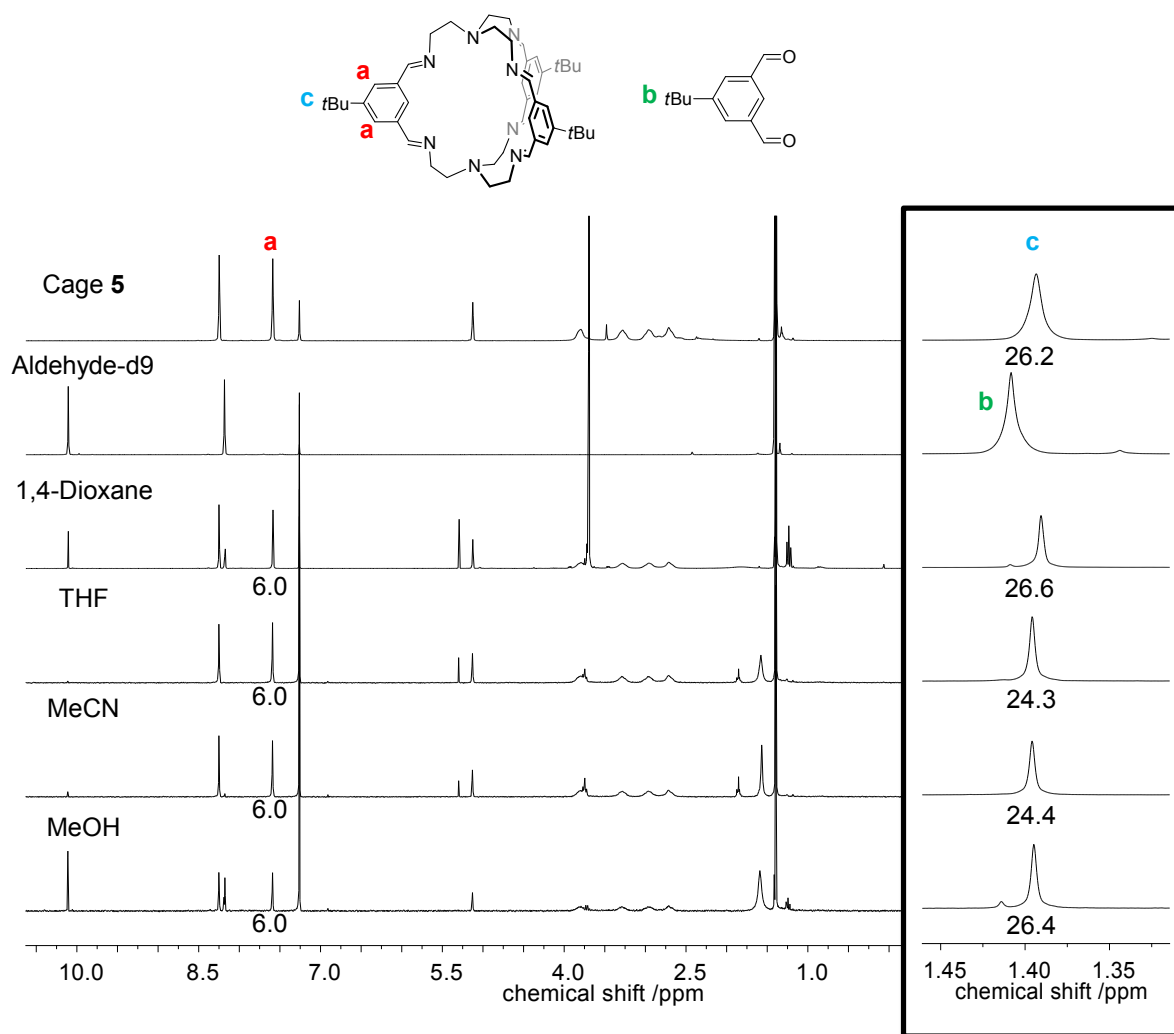

**Figure S74.** <sup>1</sup>H NMR spectra (CDCl<sub>3</sub>, 300 MHz) from the isolated precipitates (reaction a, b, c, e, f, g; reaction time: 7d). Integrals of signals at  $\delta = 7.59$  ppm and  $\delta = 1.40$  ppm are given.

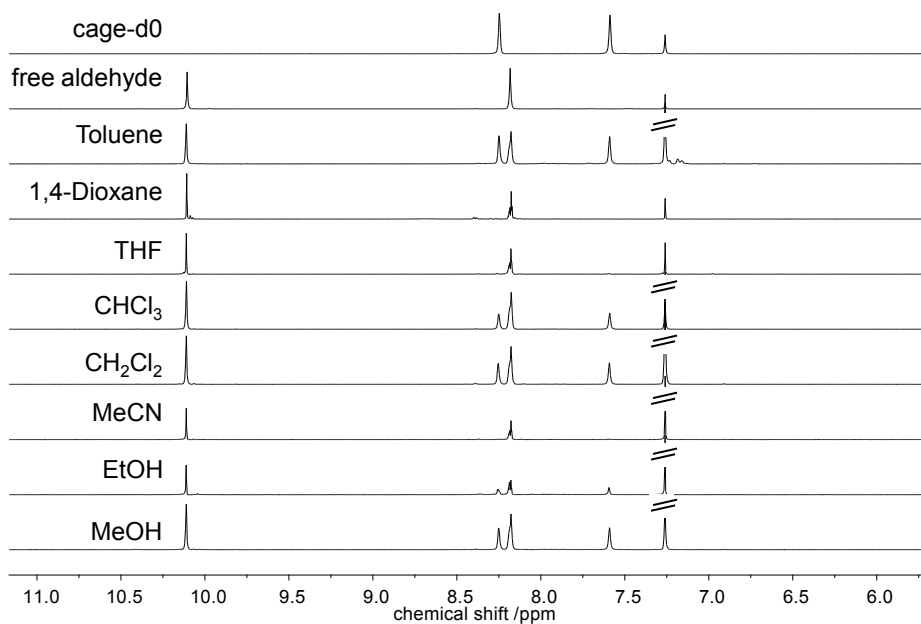

**Figure S75.**  $^1\text{H}$  NMR spectra ( $\text{CDCl}_3$ , 300 MHz; region  $\delta=11.0$  ppm – 6.00 ppm) from the solid from the mother liquor (reaction a, b, c, d, e, f, g, h; reaction time: 7d).

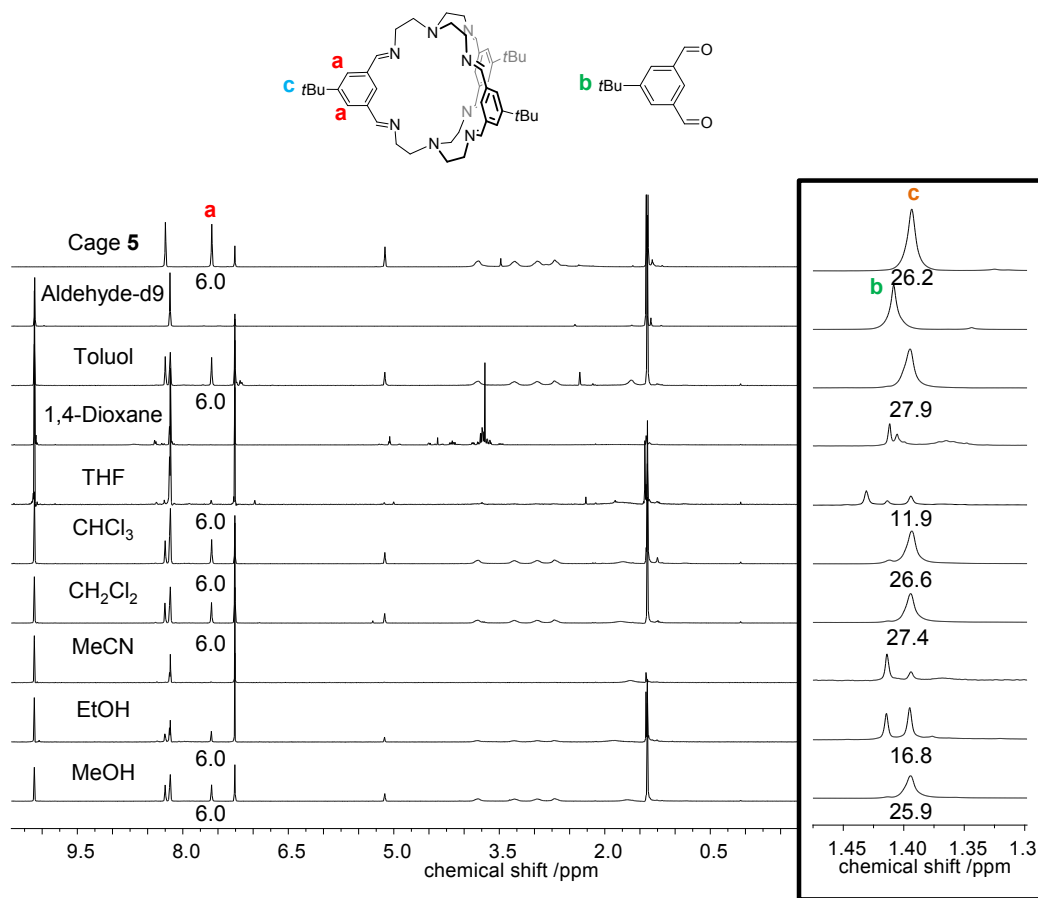

**Figure S76.**  $^1\text{H}$  NMR spectra ( $\text{CDCl}_3$ , 300 MHz) from the mother liquor (reaction a, b, c, e, f, g; reaction time: 7d). Integrals of signals at  $\delta = 7.59$  ppm and  $\delta = 1.40$  ppm are given.

With TFA

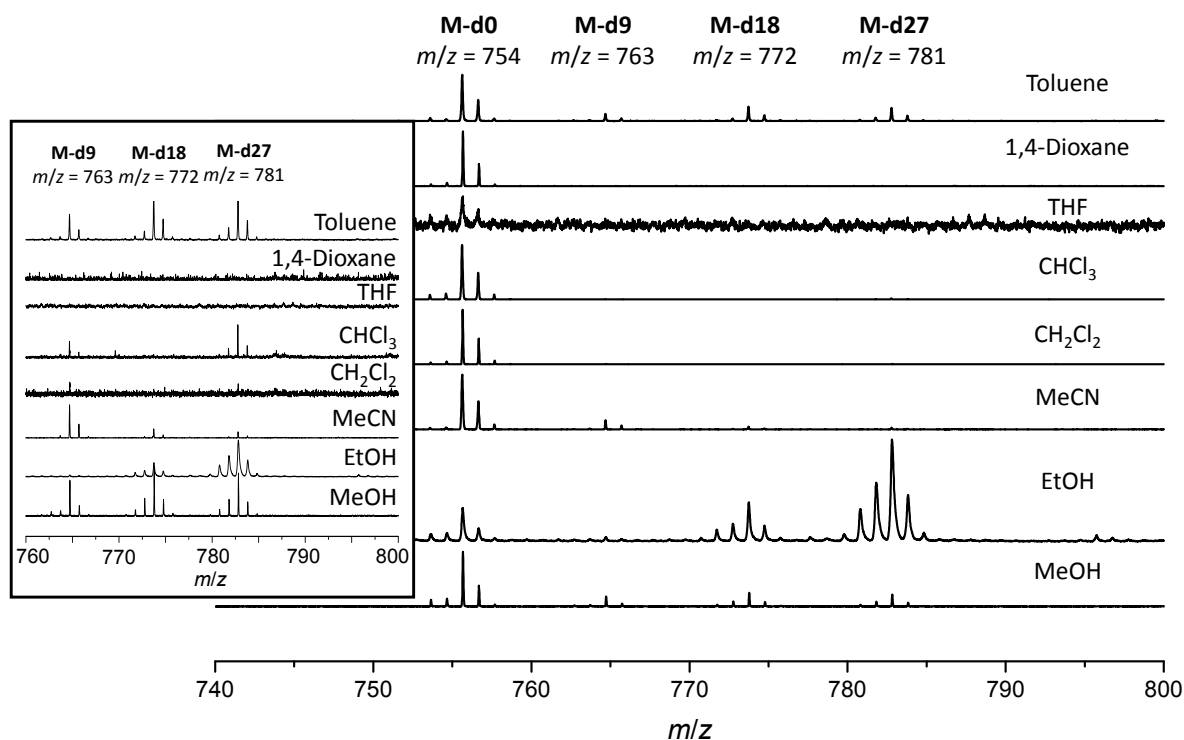

**Figure S77.** MS MALDI (TOF, DCTB) spectra of the reaction a, b, c, d, e, f, g, h taken out of the homogeneous reaction solution after 7d.

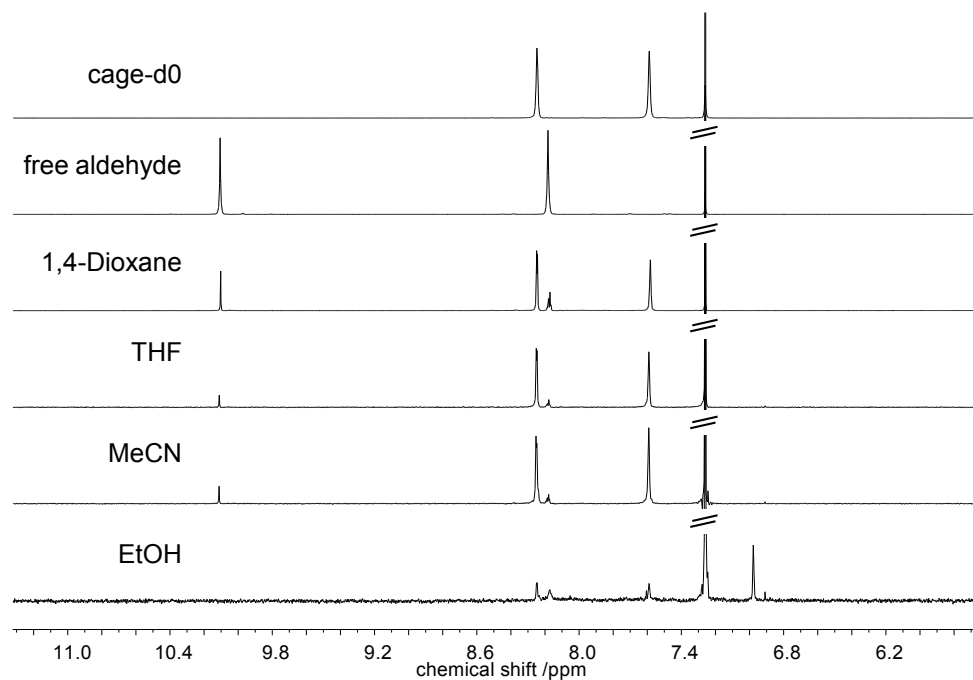

**Figure S78.**  $^1\text{H}$  NMR spectra (CDCl<sub>3</sub>, 300 MHz; region  $\delta = 11.0$  ppm – 6.00 ppm) from the isolated precipitate (reaction b, c, f, g; reaction time: 7d).

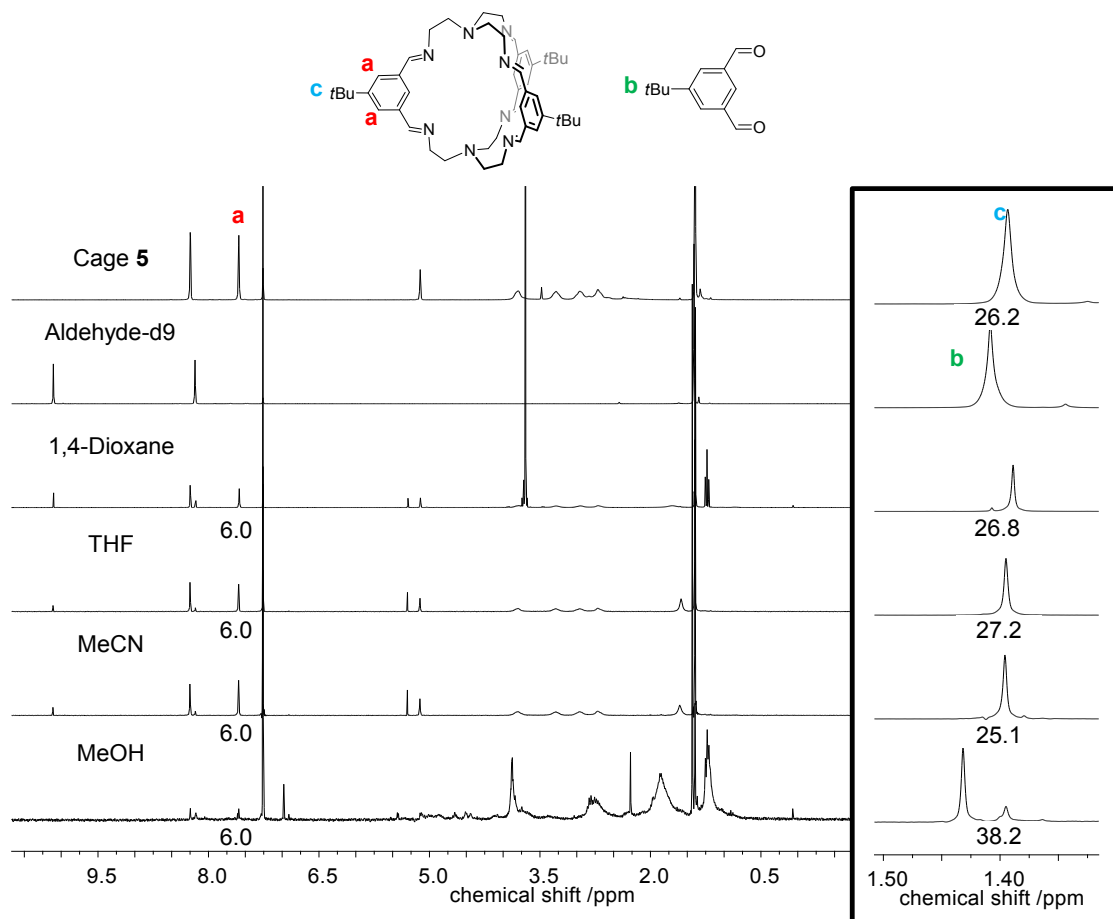

**Figure S79.**  $^1\text{H}$  NMR spectra ( $\text{CDCl}_3$ , 300 MHz) from the isolated precipitates (reaction a, b, c, e, f, g; reaction time: 7d). Integrals of signals at  $\delta = 7.59$  ppm and  $\delta = 1.40$  ppm are given.

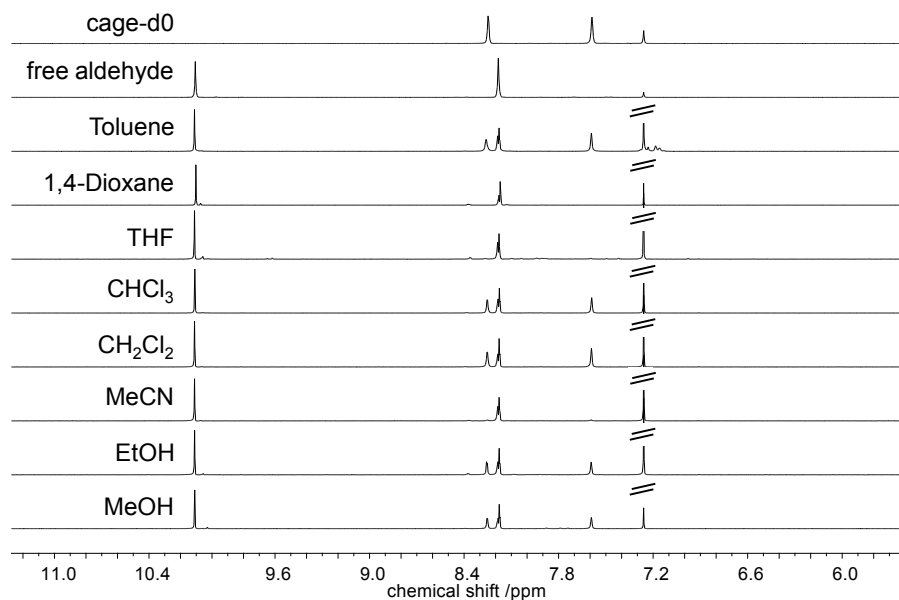

**Figure S80.**  $^1\text{H}$  NMR spectra ( $\text{CDCl}_3$ , 300 MHz; region  $\delta = 11.0$  ppm – 6.00 ppm) from the solid from the mother liquor (reaction a, b, c, d, e, f, g, h; reaction time: 7d).

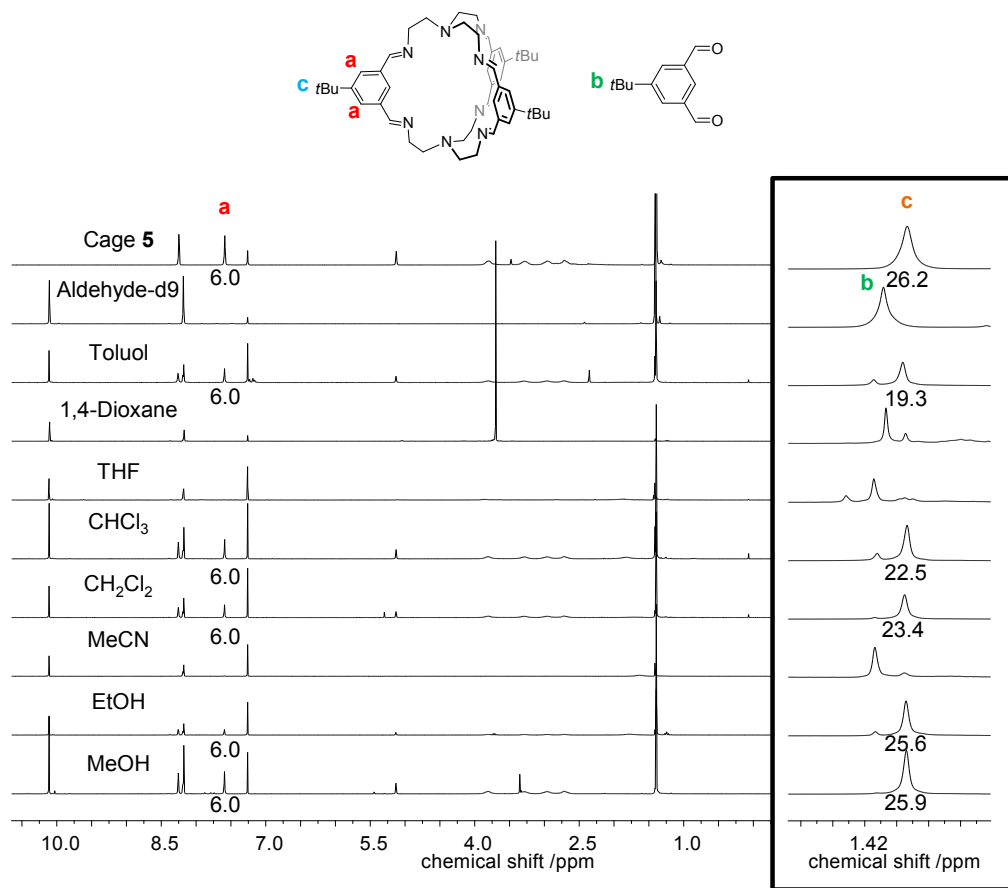

**Figure S81.**  $^1\text{H}$  NMR spectra (CDCl<sub>3</sub>, 300 MHz) from the mother liquor (reaction a, b, c, e, f, g; reaction time: 7d). Integrals of signals at  $\delta = 7.59$  ppm and  $\delta = 1.40$  ppm are given.

## 9. Amine Exchange

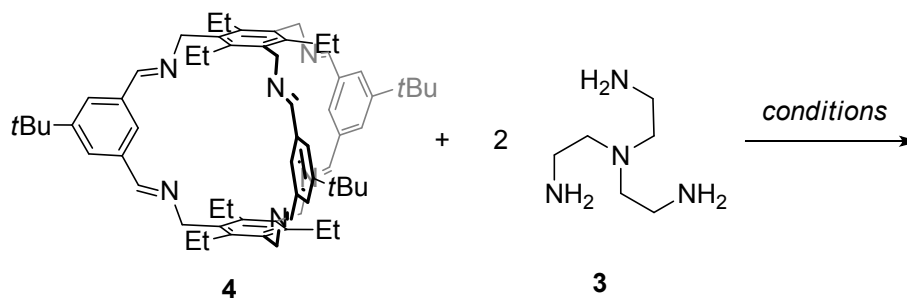

Without TFA

**Table S5.** Summary where scrambling was detected from the recorded data.

| entry | solvent                         | Exchange of amine observed in MALDI MS | Cage found in |                | Exchange of amine observed in <sup>1</sup> H NMR |       |
|-------|---------------------------------|----------------------------------------|---------------|----------------|--------------------------------------------------|-------|
|       |                                 |                                        | mother liquor | solid          | mother liquor                                    | solid |
| a     | MeOH                            | ✓                                      | ✓             | ✓              | ✓ (11%)                                          | ✗     |
| b     | EtOH                            | ✓                                      | ✗             | ✓              | ✗                                                | ✗     |
| c     | MeCN                            | ✓                                      | ✗             | ✓              | ✗                                                | ✗     |
| d     | CH <sub>2</sub> Cl <sub>2</sub> | ✓                                      | ✓             | – <sup>1</sup> | ✓ (36%)                                          | ✗     |
| e     | CHCl <sub>3</sub>               | ✓                                      | ✓             | ✓              | ✗                                                | ✗     |
| f     | THF                             | ✓                                      | ✗             | ✓              | ✗                                                | ✗     |
| g     | 1,4-Dioxane                     | ✓                                      | ✗             | ✓              | ✗                                                | ✗     |
| h     | Toluene                         | ✓                                      | ✓             | – <sup>1</sup> | ✗                                                | ✗     |

<sup>1</sup> cage stayed in solution.



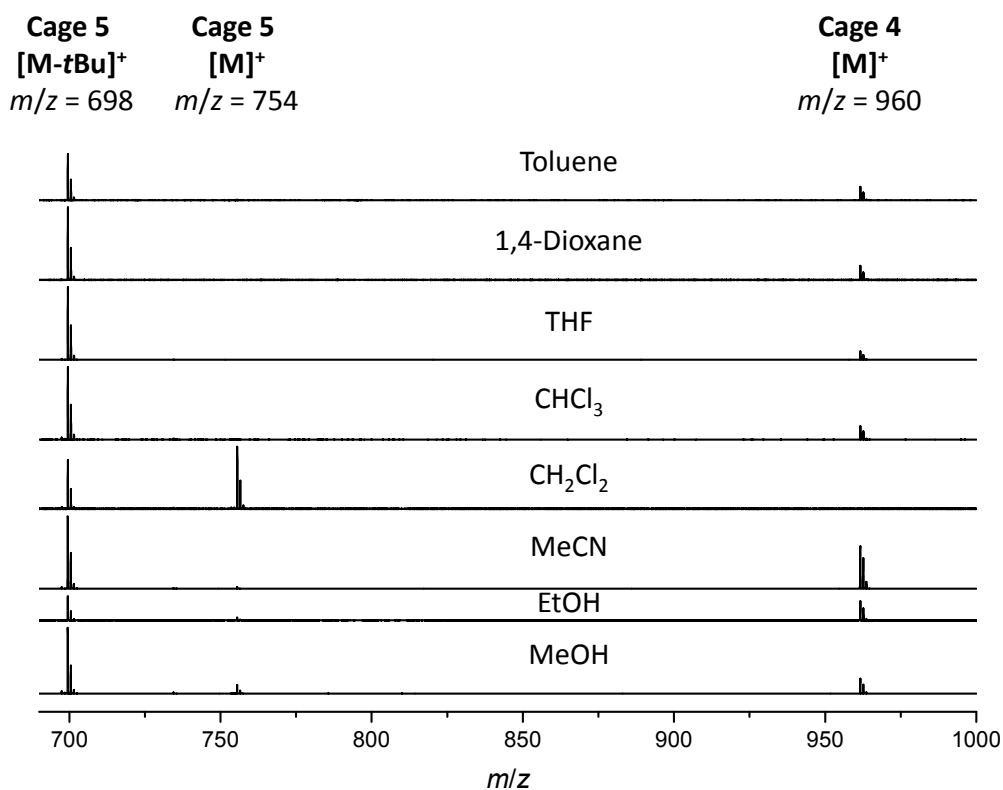

**Figure S82.** MS MALDI (TOF, DCTB) spectra of the reactions a, b, c, d, e, f, g, h taken out of the reaction mixture after 7d. An exchange of amines can be observed with all solvents.

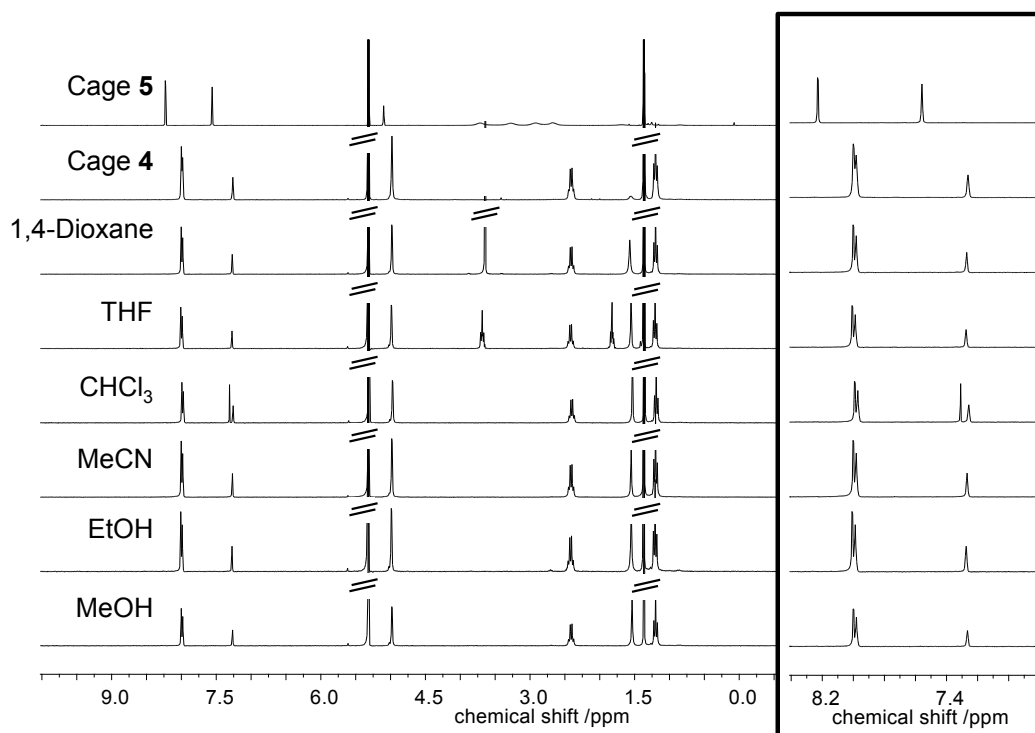

**Figure S83.**  $^1\text{H}$  NMR spectra ( $\text{CD}_2\text{Cl}_2$ , 300 MHz) from the isolated precipitate (reaction a, b, c, e, f, g; reaction time: 7d).

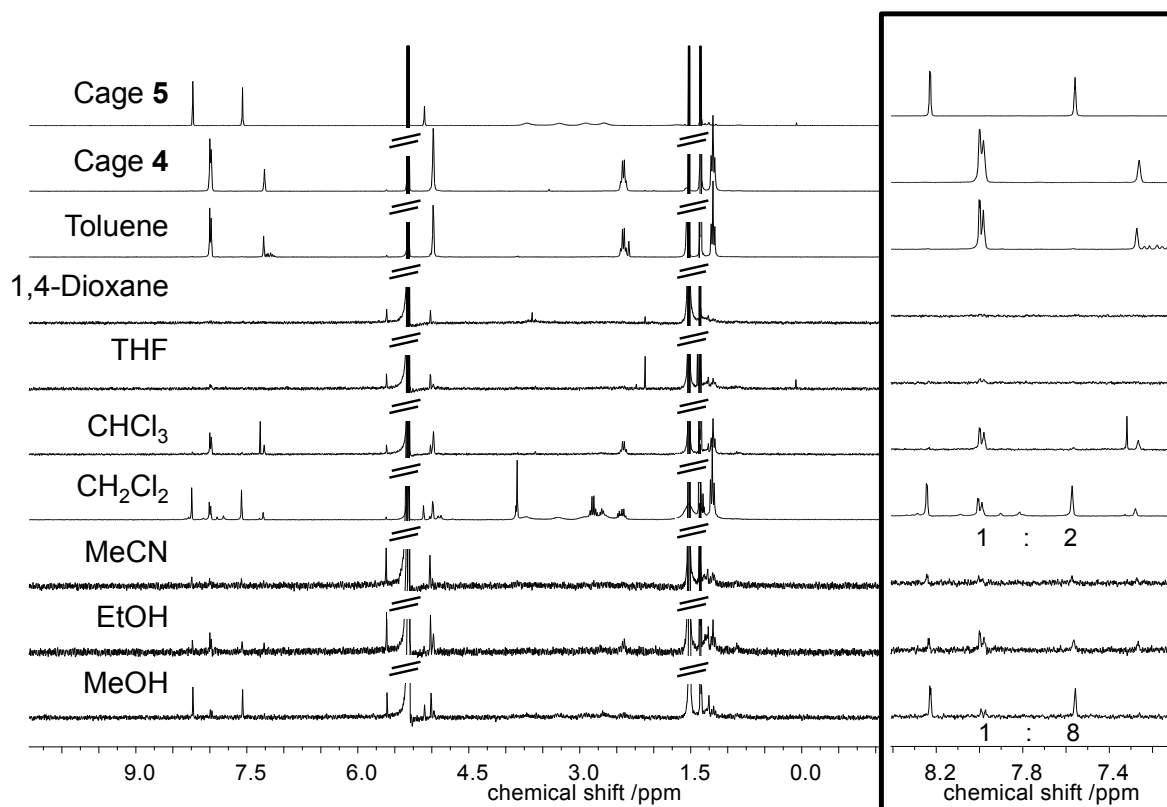

**Figure S84.**  $^1\text{H}$  NMR spectra ( $\text{CD}_2\text{Cl}_2$ , 300 MHz) from the mother liquor residue (reaction a, b, c, d, e, f, g, h; reaction time: 7d). Relative integrals are given.

with TFA

**Table S6.** Summary where scrambling was detected from the recorded data.

| entry | solvent                  | Exchange of aldehydes observed in MALDI MS | Cage found in  |                | Exchange of aldehydes observed in $^1\text{H}$ NMR |                |
|-------|--------------------------|--------------------------------------------|----------------|----------------|----------------------------------------------------|----------------|
|       |                          |                                            | mother liquor  | solid          | mother liquor                                      | solid          |
| a     | MeOH                     | ✓                                          | ✓ <sup>2</sup> | ✓              | ✓                                                  | ✗              |
| b     | EtOH                     | ✓                                          | ✓              | ✓              | ✗                                                  | ✗              |
| c     | MeCN                     | ✓                                          | ✓ <sup>2</sup> | ✓              | ✓ (71%)                                            | ✓ (17%)        |
| d     | $\text{CH}_2\text{Cl}_2$ | ✓                                          | ✓              | ✓              | ✓ (55%)                                            | ✓ (59%)        |
| e     | $\text{CHCl}_3$          | ✓                                          | ✓              | ✓              | ✓ (29%)                                            | ✗              |
| f     | THF                      | ✓ <sup>3</sup>                             | ✗              | ✓              | ✗                                                  | ✗              |
| g     | 1,4-Dioxane              | ✓                                          | ✗              | ✓              | ✗                                                  | ✗              |
| h     | Toluene                  | ✓                                          | ✓              | – <sup>1</sup> | ✓ (33%)                                            | – <sup>1</sup> |

<sup>1</sup> cage stayed in solution. <sup>2</sup> in traces. <sup>3</sup> very unclean.

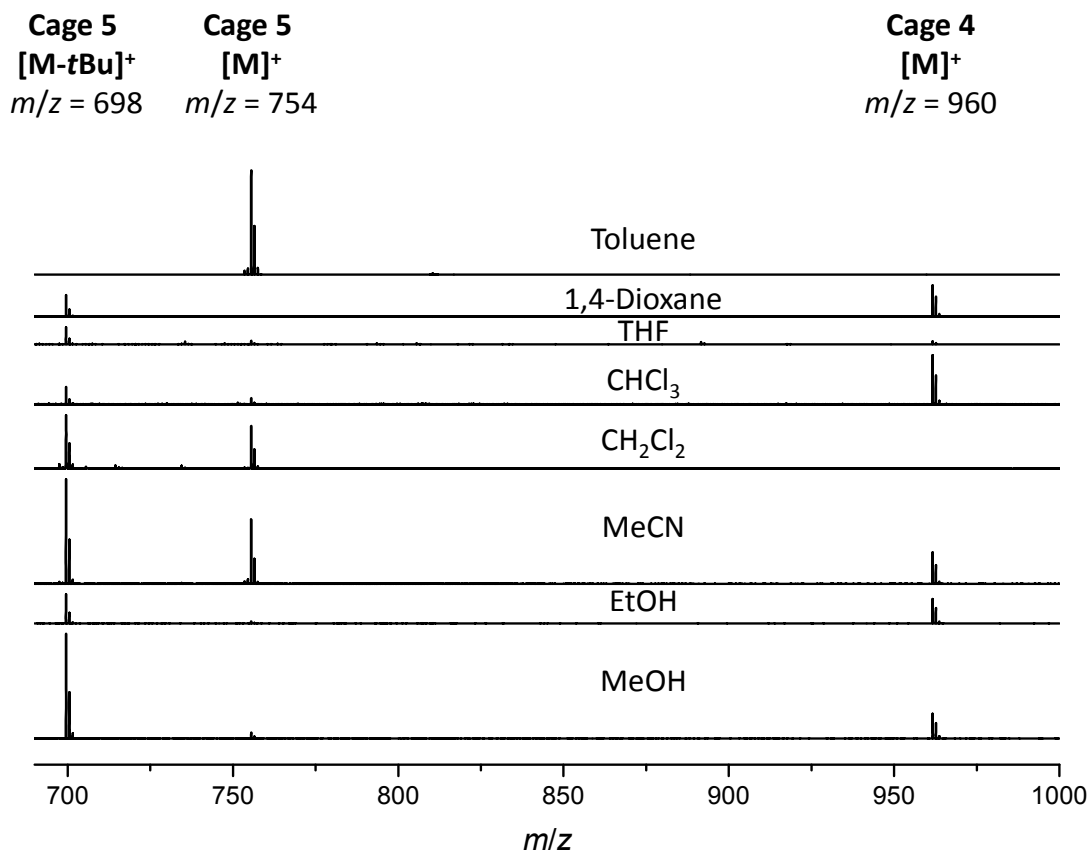

**Figure S85.** MS MALDI (TOF, DCTB) spectra of the reactions a, b, c, d, e, f, g, h taken out of the homogeneous reaction mixture after 7d.

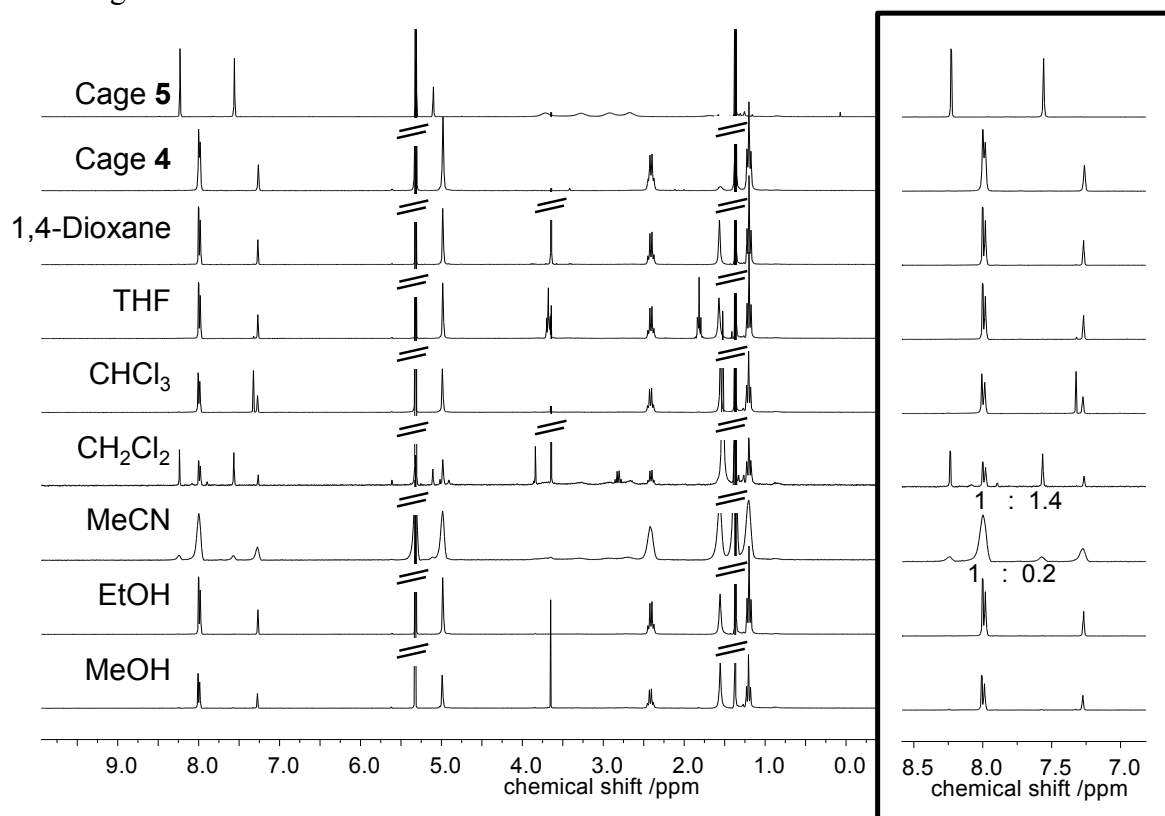

**Figure S86.** <sup>1</sup>H NMR spectra (CD<sub>2</sub>Cl<sub>2</sub>, 300 MHz) from the isolated precipitate (reaction a, b, c, d, e, f, g; reaction time: 7d).

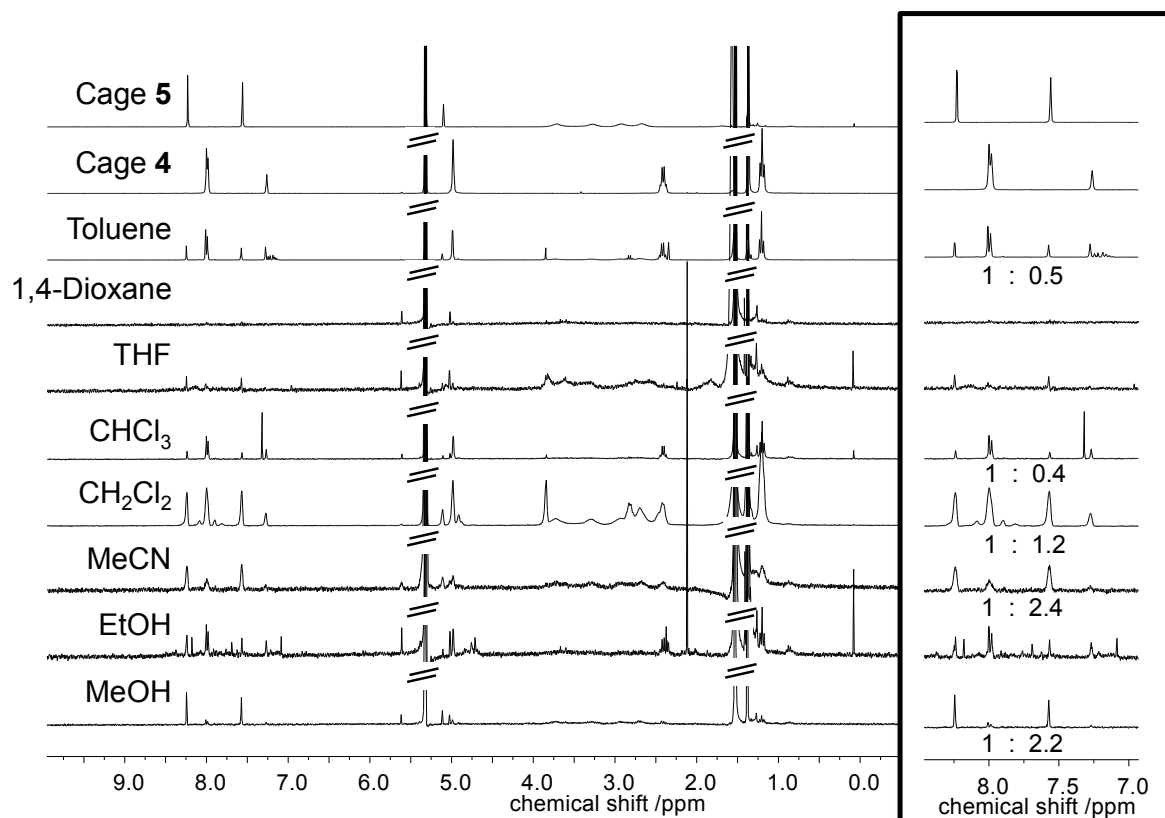

**Figure S87.** <sup>1</sup>H NMR spectra (CD<sub>2</sub>Cl<sub>2</sub>, 300 MHz) from the solid from the mother liquor (reaction a, b, c, d, e, f, g, h; reaction time: 7d). Relative integrals are given.

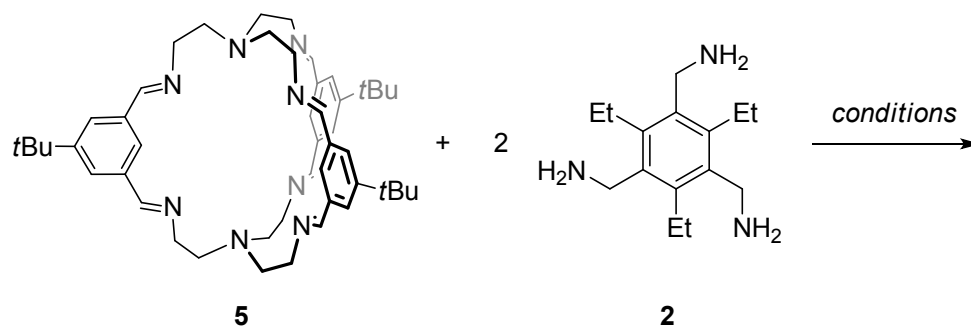

### Without TFA

**Table S7.** Summary where scrambling was detected from the recorded data.

| entry | solvent                         | Exchange of amines observed in MALDI MS | Cage found in |                | Exchange of amines observed in <sup>1</sup> H NMR |                |
|-------|---------------------------------|-----------------------------------------|---------------|----------------|---------------------------------------------------|----------------|
|       |                                 |                                         | mother liquor | solid          | mother liquor                                     | solid          |
| a     | MeOH                            | ✓                                       | ✓             | ✓              | ✗                                                 | ✓ (47%)        |
| b     | EtOH                            | ✗                                       | ✓             | - <sup>1</sup> | ✗                                                 | - <sup>1</sup> |
| c     | MeCN                            | ✗                                       | ✓             | ✓              | ✗                                                 | ✓ (7%)         |
| d     | CH <sub>2</sub> Cl <sub>2</sub> | ✗                                       | ✓             | - <sup>1</sup> | ✗                                                 | - <sup>1</sup> |
| e     | CHCl <sub>3</sub>               | ✗                                       | ✓             | - <sup>1</sup> | ✗                                                 | - <sup>1</sup> |
| f     | THF                             | ✗                                       | ✓             | ✓              | ✗                                                 | ✗              |
| g     | 1,4-Dioxane                     | ✗                                       | ✓             | ✗              | ✗                                                 | ✗              |
| h     | Toluene                         | ✗                                       | ✓             | - <sup>1</sup> | ✗                                                 | - <sup>1</sup> |

<sup>1</sup> cage stayed in solution.

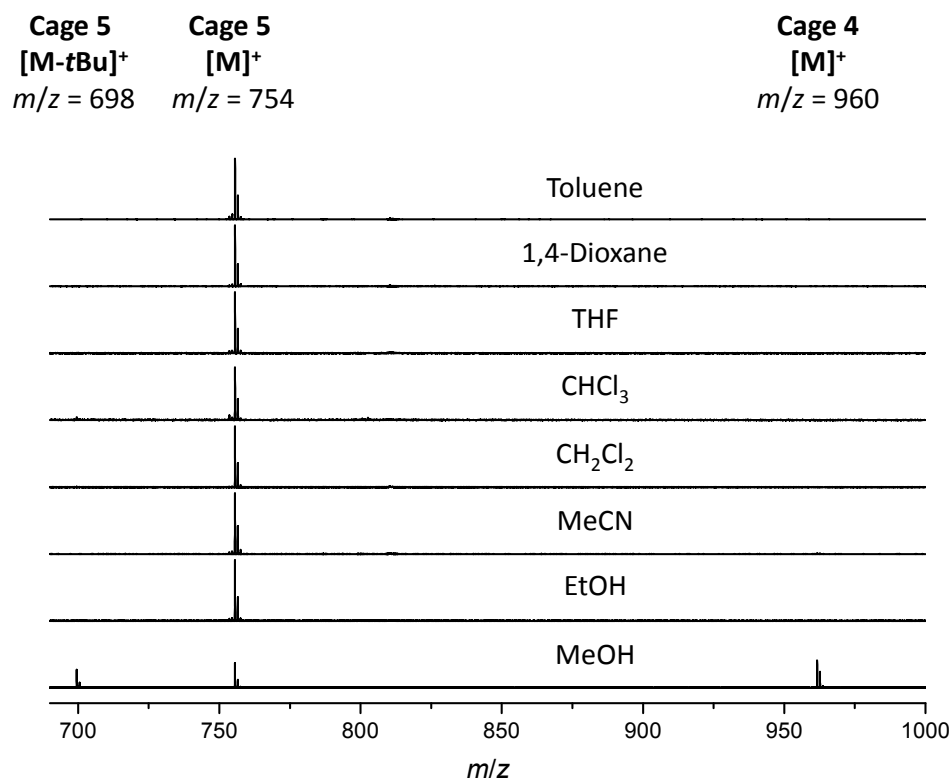

**Figure S88.** MS MALDI (TOF, DCTB) spectra of the reaction a, b, c, d, e, f, g, h taken out of the homogeneous reaction solution after 7d. An exchange of amines can be observed with methanol.

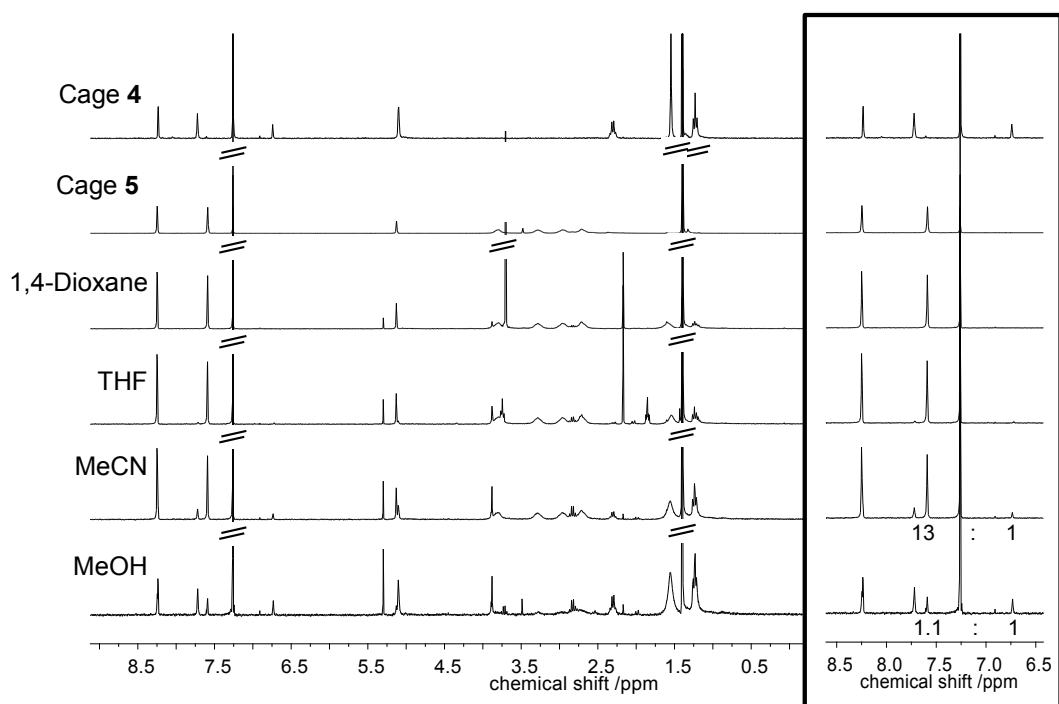

**Figure S89.**  $^1H$  NMR spectra (CDCl<sub>3</sub>, 300 MHz). from the isolated precipitate (reaction a, c, f, g; reaction time: 7d).

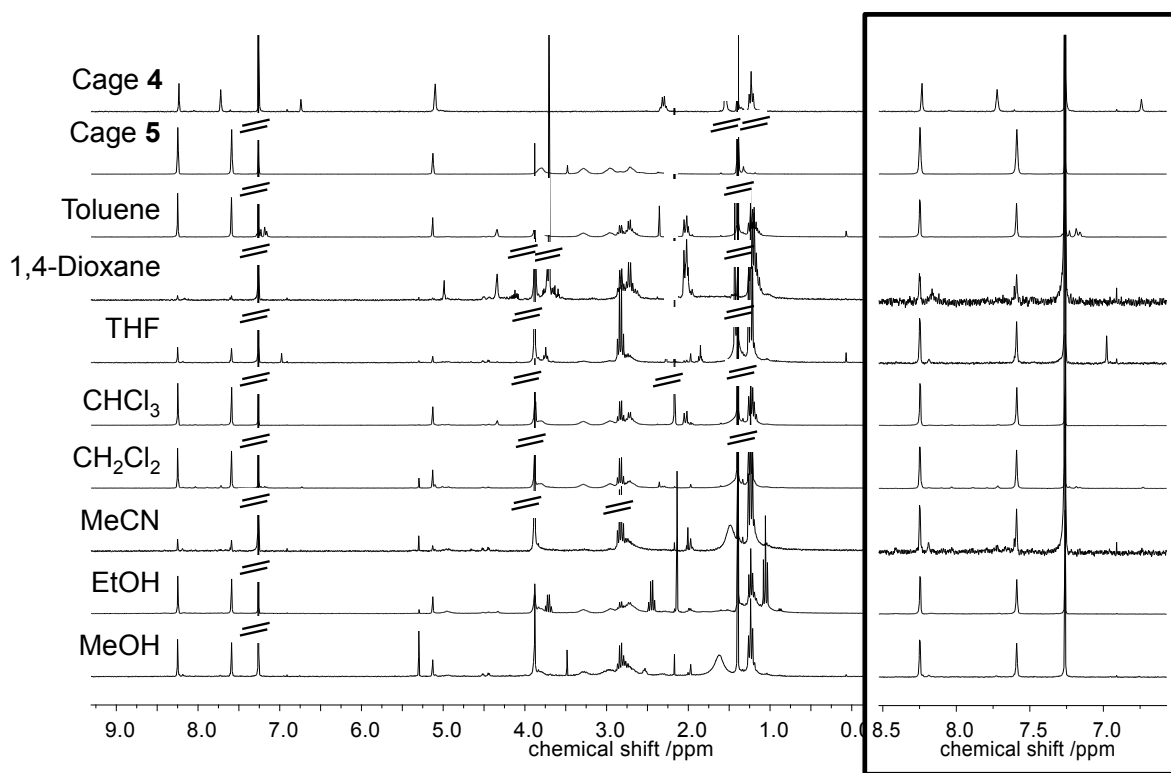

**Figure S90.**  $^1\text{H}$  NMR spectra ( $\text{CDCl}_3$ , 300 MHz) from the isolated solid from the mother liquor (reaction a, b, c, d, e, f, g, h; reaction time: 7d).

with TFA

**Table S8.** Summary where scrambling was detected from the recorded data.

| entry | solvent                  | Exchange of amines observed in MALDI MS | Cage found in |                | Exchange of amines observed in $^1\text{H}$ NMR |                |
|-------|--------------------------|-----------------------------------------|---------------|----------------|-------------------------------------------------|----------------|
|       |                          |                                         | Mother liquor | solid          | Mother liquor                                   | solid          |
| a     | MeOH                     | ✓                                       | ✓             | ✓              | ✗                                               | ✓ (100%)       |
| b     | EtOH                     | ✗                                       | ✓             | - <sup>1</sup> | ✗                                               | - <sup>1</sup> |
| c     | MeCN                     | ✗                                       | ✓             | ✓              | ✗                                               | ✓ (13%)        |
| d     | $\text{CH}_2\text{Cl}_2$ | ✗                                       | ✓             | - <sup>1</sup> | ✗                                               | - <sup>1</sup> |
| e     | $\text{CHCl}_3$          | ✗                                       | ✓             | - <sup>1</sup> | ✗                                               | - <sup>1</sup> |
| f     | THF                      | ✗                                       | ✓             | ✓              | ✗                                               | ✗              |
| g     | 1,4-Dioxane              | ✗                                       | ✓             | ✗              | ✗                                               | - <sup>1</sup> |
| h     | Toluene                  | ✗                                       | ✓             | - <sup>1</sup> | ✗                                               | - <sup>1</sup> |

<sup>1</sup> cage stayed in solution.

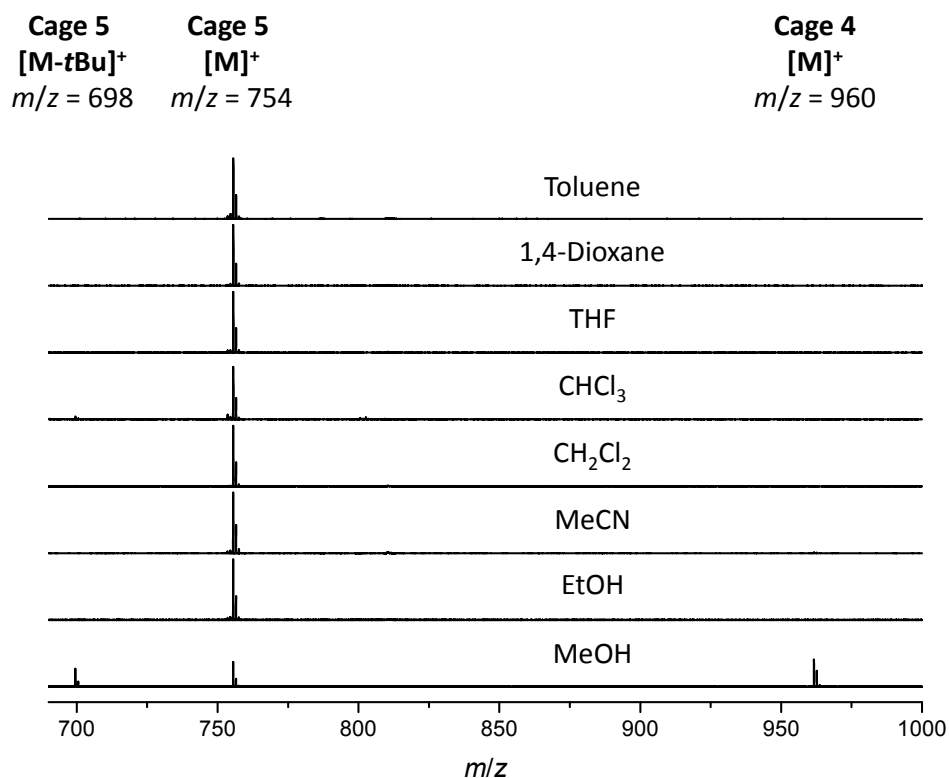

**Figure S91.** MS MALDI (TOF, DCTB) spectra of the reaction a, b, c, d, e, f, g, h taken out of the homogeneous reaction solution after 7d. An exchange of amines can be observed in methanol.

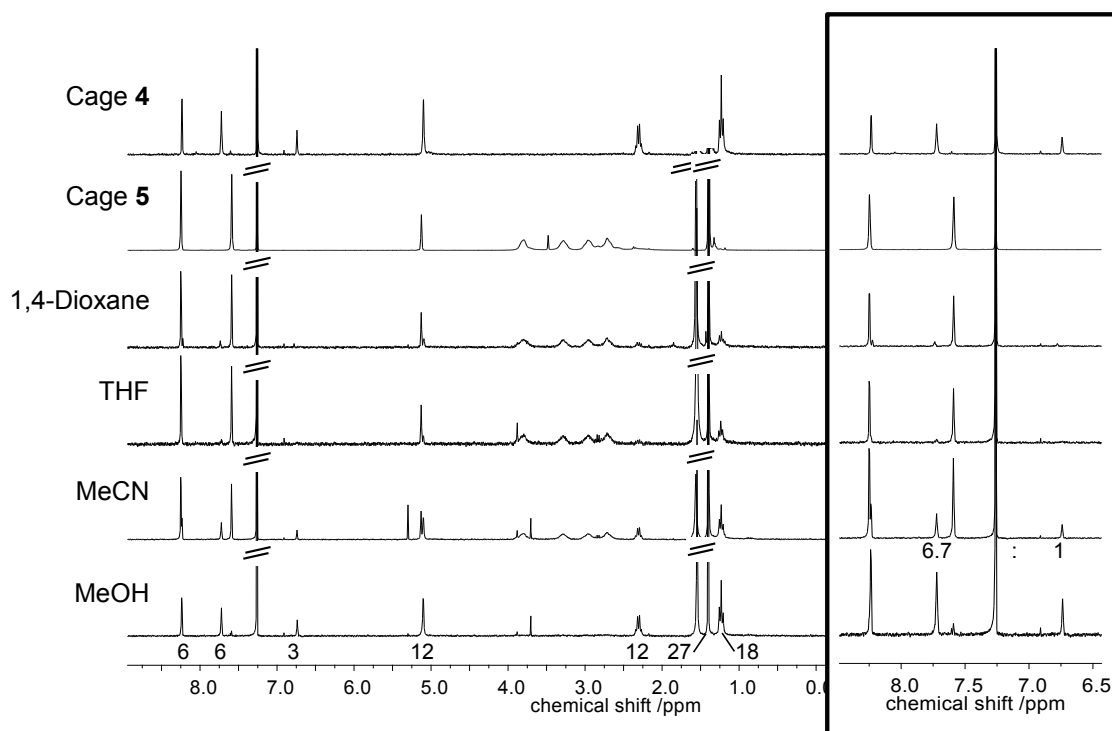

**Figure S92.**  $^1\text{H}$  NMR spectra ( $\text{CDCl}_3$ , 300 MHz) from the isolated precipitate (reaction a, c, f, g; reaction time: 7d).



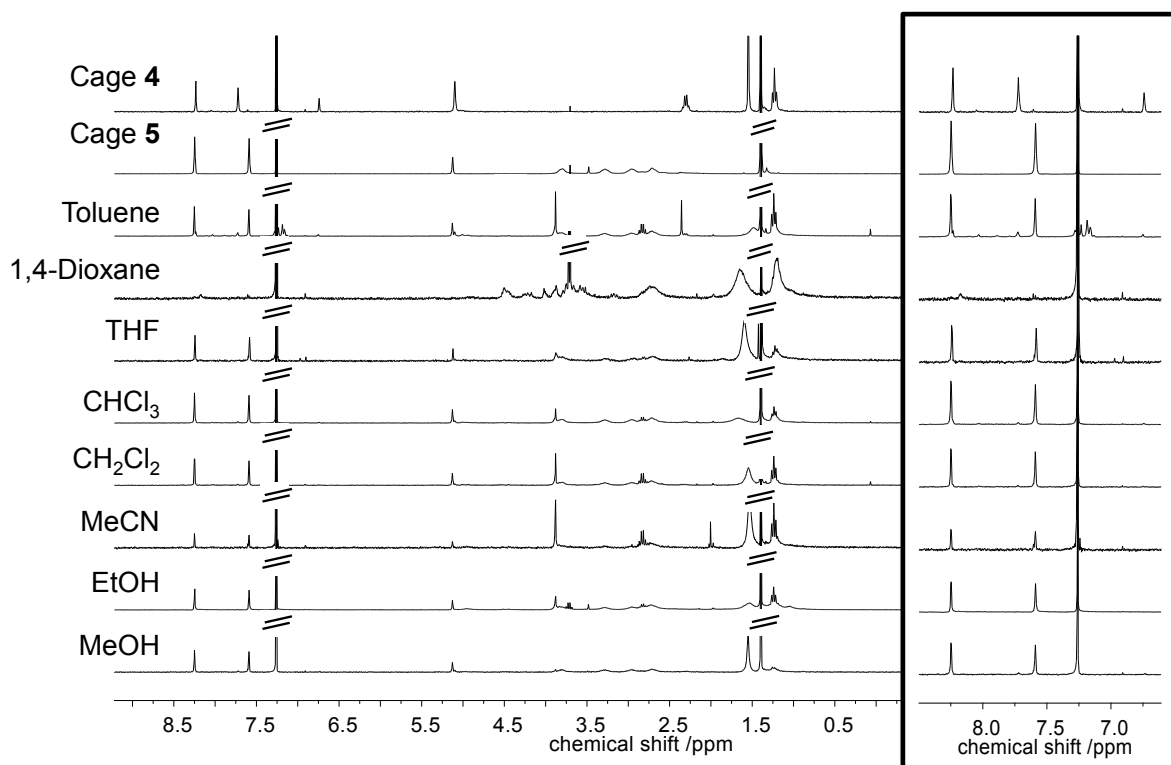

**Figure S93.**  $^1\text{H}$  NMR spectra ( $\text{CDCl}_3$ , 300 MHz) from the mother liquor residue (reaction a, b, c, d, e, f, g, h; reaction time: 7d).

## 10. Estimating Thermodynamic Data for Amine Exchange

In dichloromethane- $d_2$

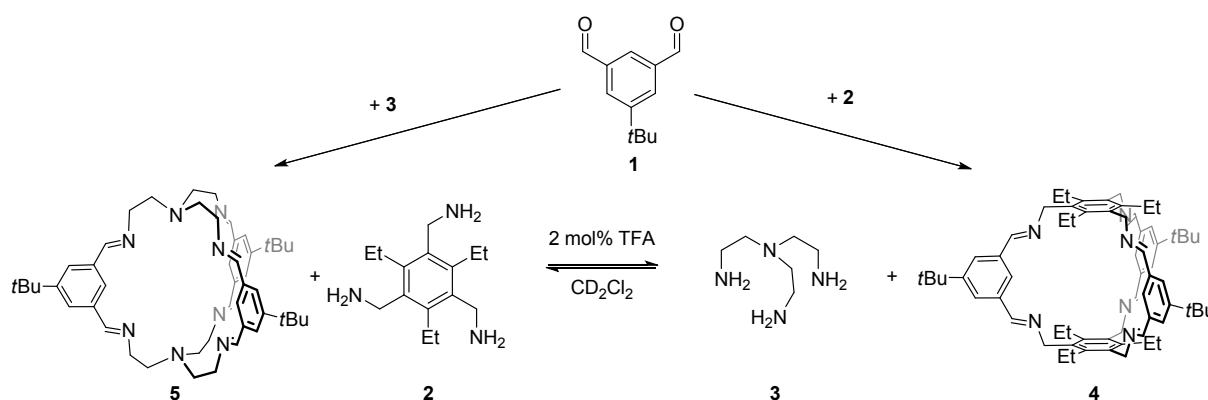

**Scheme S1** Dynamic transformation of cage **5** to **4** and vice versa with TFA as a catalyst.

**Table S9.** Integrals of diagnostic signals of compound **2**, **3**, **4**, **5** found in the reaction solution.

| entry | <sup>1</sup> H NMR integrals |                        |                        |                        | Normed integrals       |                        |                        |                        |
|-------|------------------------------|------------------------|------------------------|------------------------|------------------------|------------------------|------------------------|------------------------|
|       | Cage 4                       | Cage 5                 | Amine 2                | Amine 3                | Cage 4                 | Cage 5                 | Amine 2                | Amine 3                |
|       | δ= 7.28<br>ppm<br>(3H)       | δ= 7.58<br>ppm<br>(6H) | δ= 3.84<br>ppm<br>(6H) | δ= 2.71<br>ppm<br>(6H) | δ= 7.28<br>ppm<br>(1H) | δ= 7.58<br>ppm<br>(1H) | δ= 3.84<br>ppm<br>(1H) | δ= 2.71<br>ppm<br>(1H) |
| A     | 0.25                         | 1.00                   | 1.21                   | 0.77                   | 0.08                   | 0.17                   | 0.20                   | 0.13                   |
| B     | 0.29                         | 1.00                   | 1.71                   | 0.84                   | 0.10                   | 0.17                   | 0.29                   | 0.14                   |
| C     | 0.47                         | 1.00                   | 4.32                   | 1.87                   | 0.16                   | 0.17                   | 0.72                   | 0.31                   |
| D     | 0.46                         | 1.00                   | 5.70                   | 2.18                   | 0.15                   | 0.17                   | 0.95                   | 0.36                   |
| E     | 0.48                         | 1.00                   | 8.82                   | 4.36                   | 0.16                   | 0.17                   | 1.47                   | 0.73                   |
| F     | 0.91                         | 1.00                   | 1.73                   | 0.77                   | 0.30                   | 0.17                   | 0.29                   | 0.13                   |
| G     | 0.20                         | 1.00                   | 1.48                   | 1.17                   | 0.07                   | 0.17                   | 0.25                   | 0.20                   |
| H     | 0.14                         | 1.00                   | 1.21                   | 1.16                   | 0.05                   | 0.17                   | 0.20                   | 0.19                   |

**Table S10.** Calculation of equilibrium concentration of compounds **4**, **3**, **5**, **2** in the reactions solution.

| entry | used molar amounts for synthesis |                |                | Calculated molar amounts from <sup>1</sup> H NMR spectrum |                |               |                |
|-------|----------------------------------|----------------|----------------|-----------------------------------------------------------|----------------|---------------|----------------|
|       | Aldehyde <b>1</b>                | Amine <b>2</b> | Amine <b>3</b> | Cage <b>4</b>                                             | Amine <b>3</b> | Cage <b>5</b> | Amine <b>2</b> |
|       | μmol                             | μmol           | μmol           | μmol                                                      | μmol           | μmol          | μmol           |
| A     | 13.6                             | 8.40           | 8.90           | 1.51                                                      | 2.86           | 3.02          | 5.38           |
| B     | 13.6                             | 11.6           | 8.90           | 1.66                                                      | 3.16           | 2.87          | 8.27           |
| C     | 13.6                             | 17.3           | 8.90           | 2.20                                                      | 4.23           | 2.34          | 12.9           |
| D     | 13.6                             | 20.1           | 8.90           | 2.17                                                      | 4.18           | 2.36          | 15.8           |
| E     | 13.6                             | 25.7           | 8.90           | 2.22                                                      | 4.27           | 2.31          | 21.3           |
| F     | 11.2                             | 4.80           | 12.6           | 2.71                                                      | 1.82           | 1.49          | 5.78           |
| G     | 9.00                             | 9.60           | 12.1           | 1.15                                                      | 3.84           | 2.88          | 6.90           |
| H     | 4.80                             | 9.60           | 13.2           | 0.96                                                      | 2.73           | 3.44          | 2.88           |

$$K = \frac{[\text{cage 5}] * [\text{amine 2}]^2}{[\text{cage 4}] * [\text{amine 3}]^2} \quad \text{(I)}$$

$$\Delta G_{eq} = -RT * \ln (K_{eq}) \quad \text{(II)}$$

**Table S11.** Calculated equilibrium constants ( $K_{eq}$ ) and Gibbs free energy ( $\Delta G_{eq}$ ) using equation **I** and **II** and the concentration of compound **2**, **3**, **4**, **5**.

## Cage 4 -&gt; Cage 5

| entry | $K_{\text{eq}}$ | $\Delta G_{\text{eq}}$<br>kJ·mol <sup>-1</sup> |
|-------|-----------------|------------------------------------------------|
| A     | 7.09            | -4.77                                          |
| B     | 11.8            | -6.02                                          |
| C     | 9.92            | -5.59                                          |
| D     | 15.5            | -6.67                                          |
| E     | 25,8            | -7.92                                          |
| F     | 5.53            | -4.17                                          |
| G     | 8.07            | -5.09                                          |
| H     | 3.98            | -3.36                                          |

The average equilibrium constant for transformation of cage 4 to cage 5 is  $K_{\text{eq}} = 11.0$  and thus  $\Delta G_{\text{eq}} = -5.83 \text{ kJ}\cdot\text{mol}^{-1}$ .

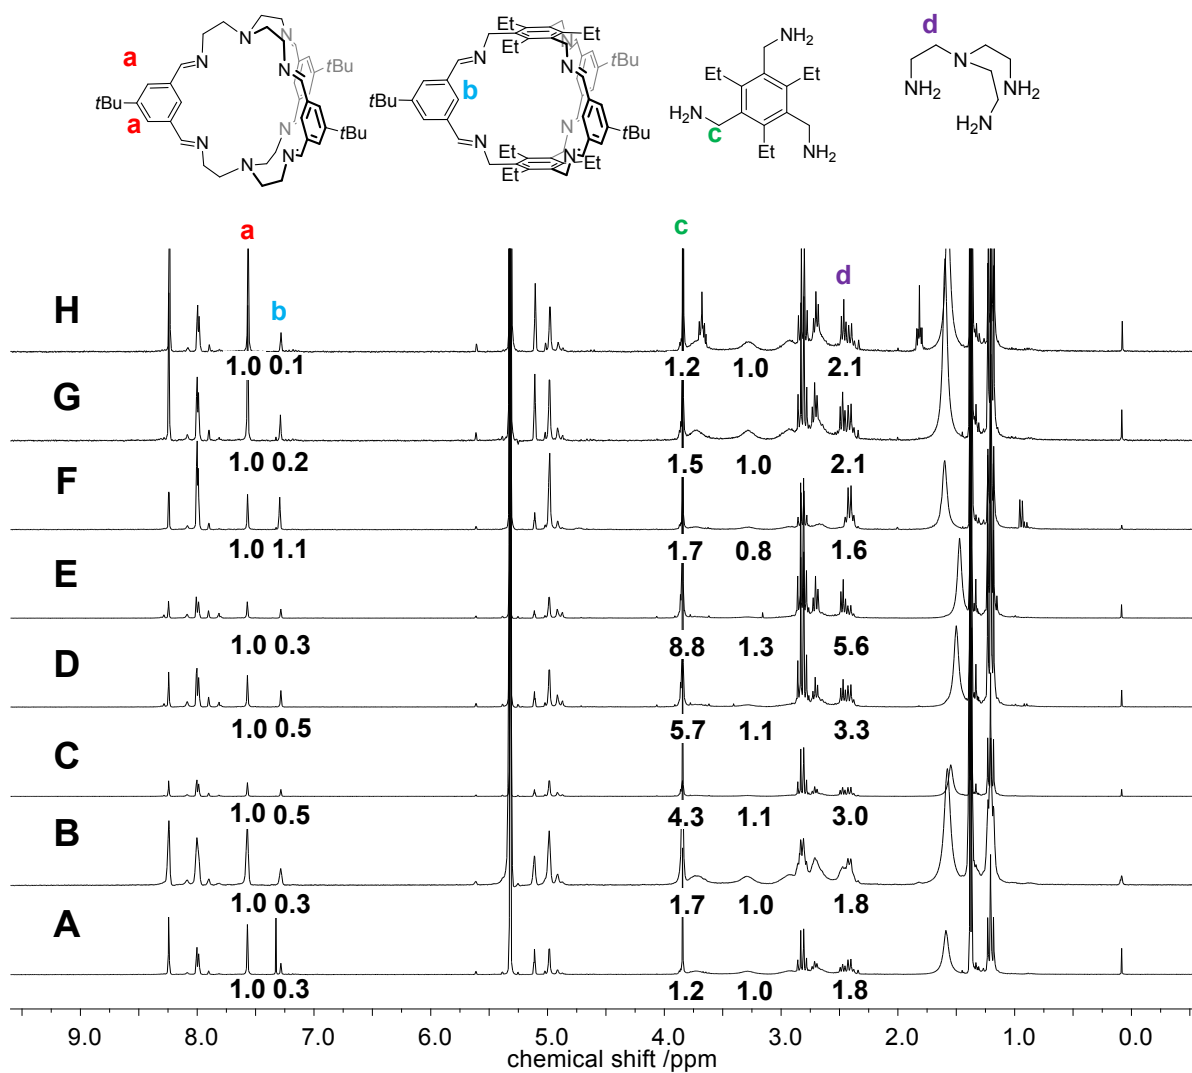

**Figure S94.**  $^1\text{H}$  NMR spectra (CD $_2$ Cl $_2$ , 300 MHz) for reactions A–H with integrated signals.

In toluene-*d*<sub>8</sub>

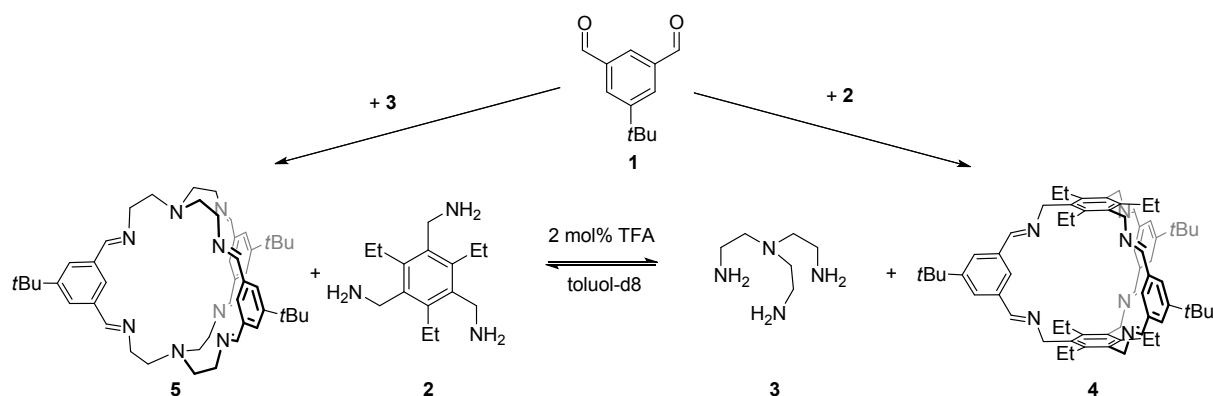

**Scheme S2** Dynamic transformation of cage **5** to **4** and vice versa with TFA as a catalyst.

**Table S12.** Integrals of diagnostic signals of compound **2**, **3**, **4**, **5** found in the reaction solution. <sup>1</sup>calculated as leftover after the reaction from the formation of cage **5**.

| entry | <sup>1</sup> H NMR integrals |                         |                         |                         | Normed integrals        |                         |                         |                         |
|-------|------------------------------|-------------------------|-------------------------|-------------------------|-------------------------|-------------------------|-------------------------|-------------------------|
|       | Cage <b>4</b>                | Cage <b>5</b>           | Amine <b>2</b>          | Amine <b>3</b>          | Cage <b>4</b>           | Cage <b>5</b>           | Amine <b>2</b>          | Amine <b>3</b>          |
|       | δ = 8.71<br>ppm<br>(3H)      | δ = 7.86<br>ppm<br>(6H) | δ = 3.74<br>ppm<br>(6H) | δ = 2.18<br>ppm<br>(6H) | δ = 8.71<br>ppm<br>(1H) | δ = 7.86<br>ppm<br>(1H) | δ = 3.74<br>ppm<br>(1H) | δ = 2.18<br>ppm<br>(1H) |
| A     | 1.00                         | 1.04                    | 0.31                    | 0.00 <sup>1</sup>       | 0.17                    | 0.17                    | 0.05                    | 0.00 <sup>1</sup>       |
| B     | 1.00                         | 0.84                    | 0.98                    | 0.00 <sup>1</sup>       | 0.17                    | 0.14                    | 0.16                    | 0.00 <sup>1</sup>       |
| C     | 1.00                         | 4.41                    | 1.81                    | 0.00 <sup>1</sup>       | 0.17                    | 0.74                    | 0.30                    | 0.00 <sup>1</sup>       |

**Table S13.** Calculation of equilibrium concentration of compounds **4**, **3**, **5**, **2** in the reactions solution. <sup>1</sup>calculated as leftover after the reaction from the formation of cage **5**.

| entry | used molar amounts for synthesis |                |                | Calculated molar amounts from <sup>1</sup> H NMR spectrum |                   |               |                |
|-------|----------------------------------|----------------|----------------|-----------------------------------------------------------|-------------------|---------------|----------------|
|       | Aldehyde <b>1</b>                | Amine <b>2</b> | Amine <b>3</b> | Cage <b>4</b>                                             | Amine <b>3</b>    | Cage <b>5</b> | Amine <b>2</b> |
|       | μmol                             | μmol           | μmol           | μmol                                                      | μmol              | μmol          | μmol           |
| A     | 13.6                             | 25.7           | 8.90           | 2.22                                                      | 4.28 <sup>1</sup> | 2.31          | 21.3           |
| B     | 11.2                             | 4.80           | 12.6           | 2.28                                                      | 0.97 <sup>1</sup> | 1.92          | 6.63           |
| H     | 9.20                             | 9.60           | 12.1           | 0.75                                                      | 3.02 <sup>1</sup> | 3.29          | 7.71           |

$$K = \frac{[\text{cage } \mathbf{5}] * [\text{amine } \mathbf{2}]^2}{[\text{cage } \mathbf{4}] * [\text{amine } \mathbf{3}]^2} \quad (\mathbf{I})$$

$$\Delta G_{eq} = -RT * \ln (K_{eq}) \quad \text{(II)}$$

**Table S14.** Calculated equilibrium constants ( $K_{eq}$ ) and Gibbs free energy ( $\Delta G_{eq}$ ) using equation I and II and the concentration of compound 2, 3, 4, 5.

Cage 5 -> Cage 4

| entry | $K_{eq}$ | $\Delta G_{eq}$<br>kJ·mol <sup>-1</sup> |
|-------|----------|-----------------------------------------|
| A     | 25.7     | -7.91                                   |
| B     | 39.7     | -8.97                                   |
| H     | 28.7     | -8.18                                   |

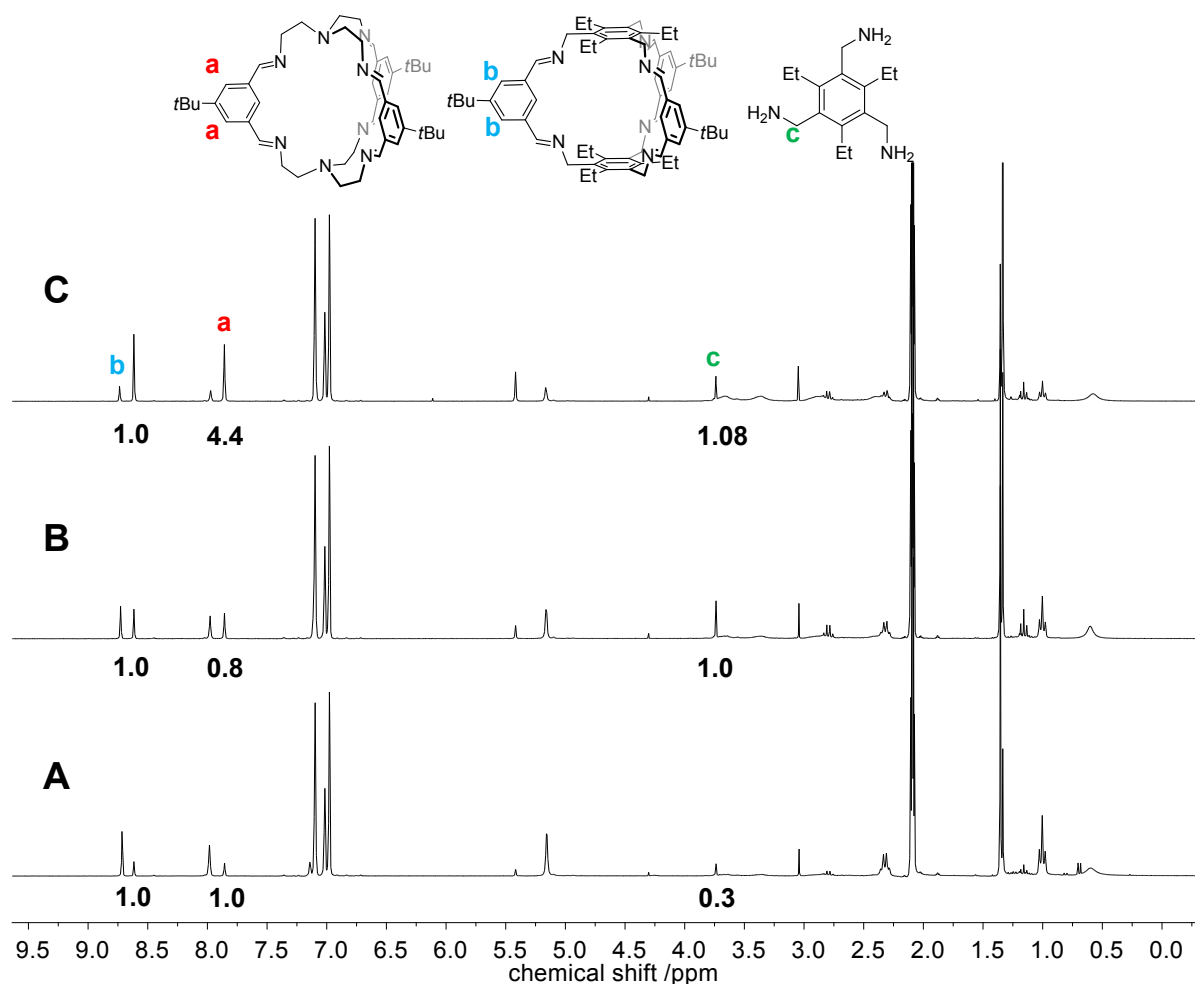

**Figure S95.** <sup>1</sup>H NMR spectra (Toluol-d<sub>8</sub>, 300 MHz) for reactions A–C with integrated signals.

### Solubility of cage 4 and 5

The solubility was determined by suspending a defined amount (ca. 8 mg) of the pure cages in a defined volume (ca. 2 mL) of the corresponding solvents and sonicate the slurry. Not dissolved cages was removed by filtration via a syringe filter and the solvent of the filtrate was removed in vacuum. The weight of the remaining residue was used to estimate the solubility in  $\text{mg}\cdot\text{mL}^{-1}$ .

**Table S15: Solubility of cage compounds 4 and 5 in various solvents.**

| Solvent                         | Solubility of Cage 4 <sup>1</sup> | Solubility of Cage 5 <sup>1</sup> |
|---------------------------------|-----------------------------------|-----------------------------------|
| MeOH                            | <1                                | 2                                 |
| EtOH                            | <1                                | 3                                 |
| MeCN                            | <1                                | <1                                |
| CH <sub>2</sub> Cl <sub>2</sub> | 5                                 | >15                               |
| CHCl <sub>3</sub>               | <1                                | 6                                 |
| THF                             | <1                                | 1                                 |
| 1,4-Dioxane                     | <1                                | <1                                |
| Toluene                         | >12                               | 9                                 |

<sup>1</sup>in  $\text{mg}\cdot\text{mL}^{-1}$
